# Supplementary material
Source: ML conference proceedings conference paper supplement (https://openreview.net/forum?id=jCctxI1BGF)
Supplement: supplementary_material [file visualization_process_based.pdf › submit_GraphTokenizer/submit_GraphTokenizer/vocabulary_visualization/visualization_process_based.pdf]

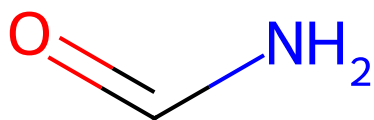

Token ID: 1297  
Sequence: NC=O

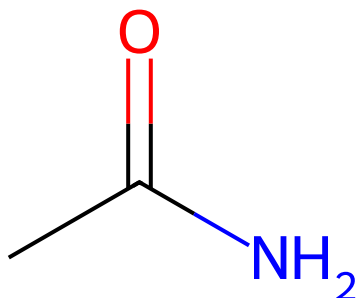

Token ID: 2262  
Sequence: CC(N)=O

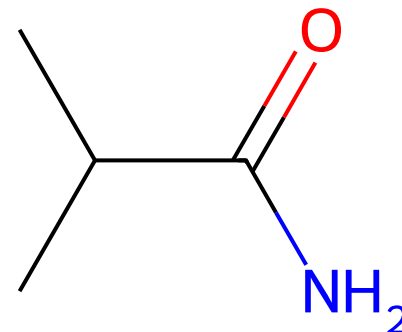

Token ID: 2876  
Sequence: CC(C)C(N)=O

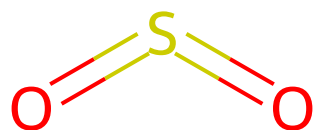

Token ID: 731  
Sequence: O=S=O

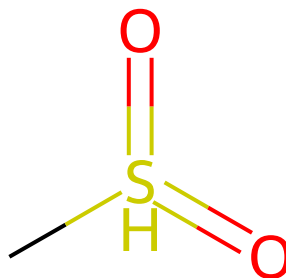

Token ID: 921  
Sequence: C[SH](=O)=O

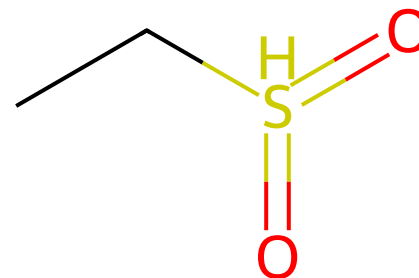

Token ID: 2908  
Sequence: CC[SH](=O)=O

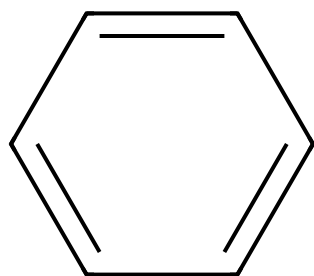

Token ID: 1201  
Sequence: c1ccccc1

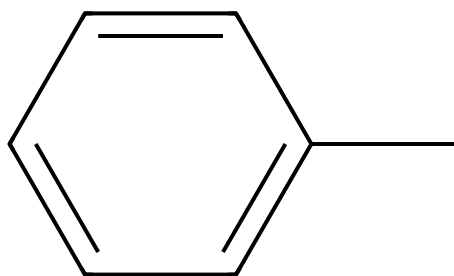

Token ID: 2132  
Sequence: Cc1ccccc1

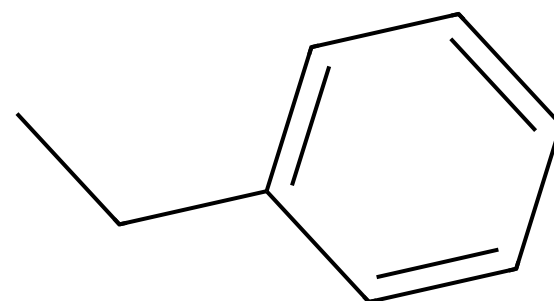

Token ID: 2163  
Sequence: CCc1ccccc1
