# Supplementary material
Source: ML conference proceedings conference paper supplement (https://openreview.net/forum?id=jCctxI1BGF)
Supplement: supplementary_material [file visualization_representative.pdf › submit_GraphTokenizer/submit_GraphTokenizer/vocabulary_visualization/visualization_representative.pdf]

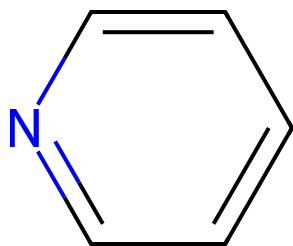

Token ID: 2524  
Sequence: c1ccncc1

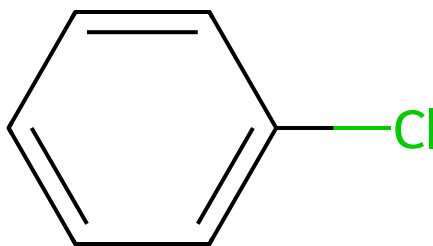

Token ID: 3116  
Sequence: Clc1ccccc1

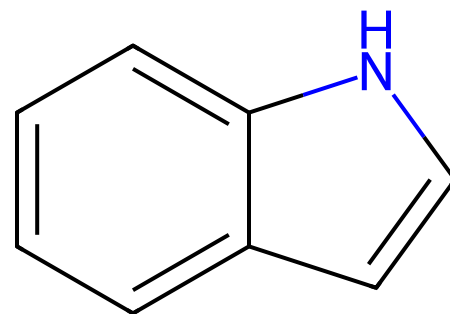

Token ID: 2977  
Sequence: c1ccc2[nH]ccc2c1

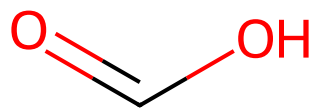

Token ID: 1057  
Sequence: O=CO

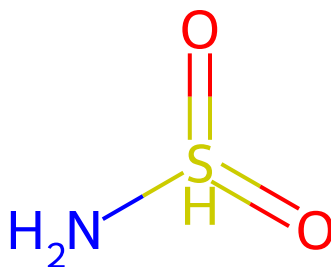

Token ID: 378  
Sequence: N[SH](=O)=O

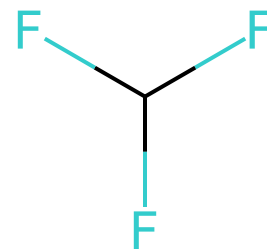

Token ID: 2119  
Sequence: FC(F)F

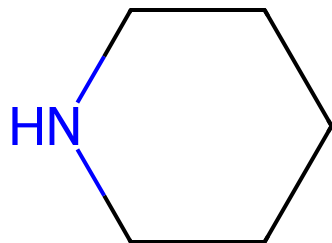

Token ID: 1544  
Sequence: C1CCNCC1

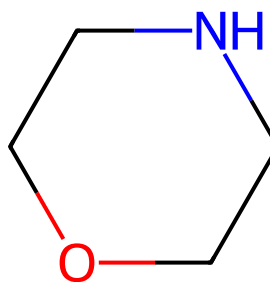

Token ID: 662  
Sequence: C1COCCN1

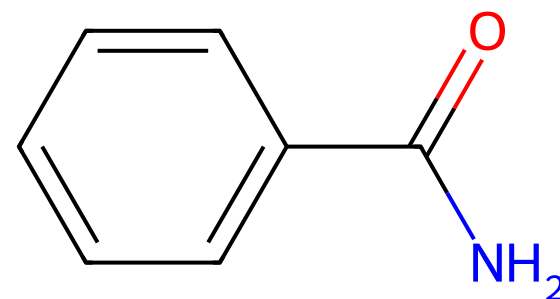

Token ID: 2059  
Sequence: NC(=O)c1ccccc1
