# Supplementary material
Source: ML conference proceedings conference paper supplement (https://openreview.net/forum?id=jCctxI1BGF)

# AQSQL Dataset - Serialization Speed Comparison

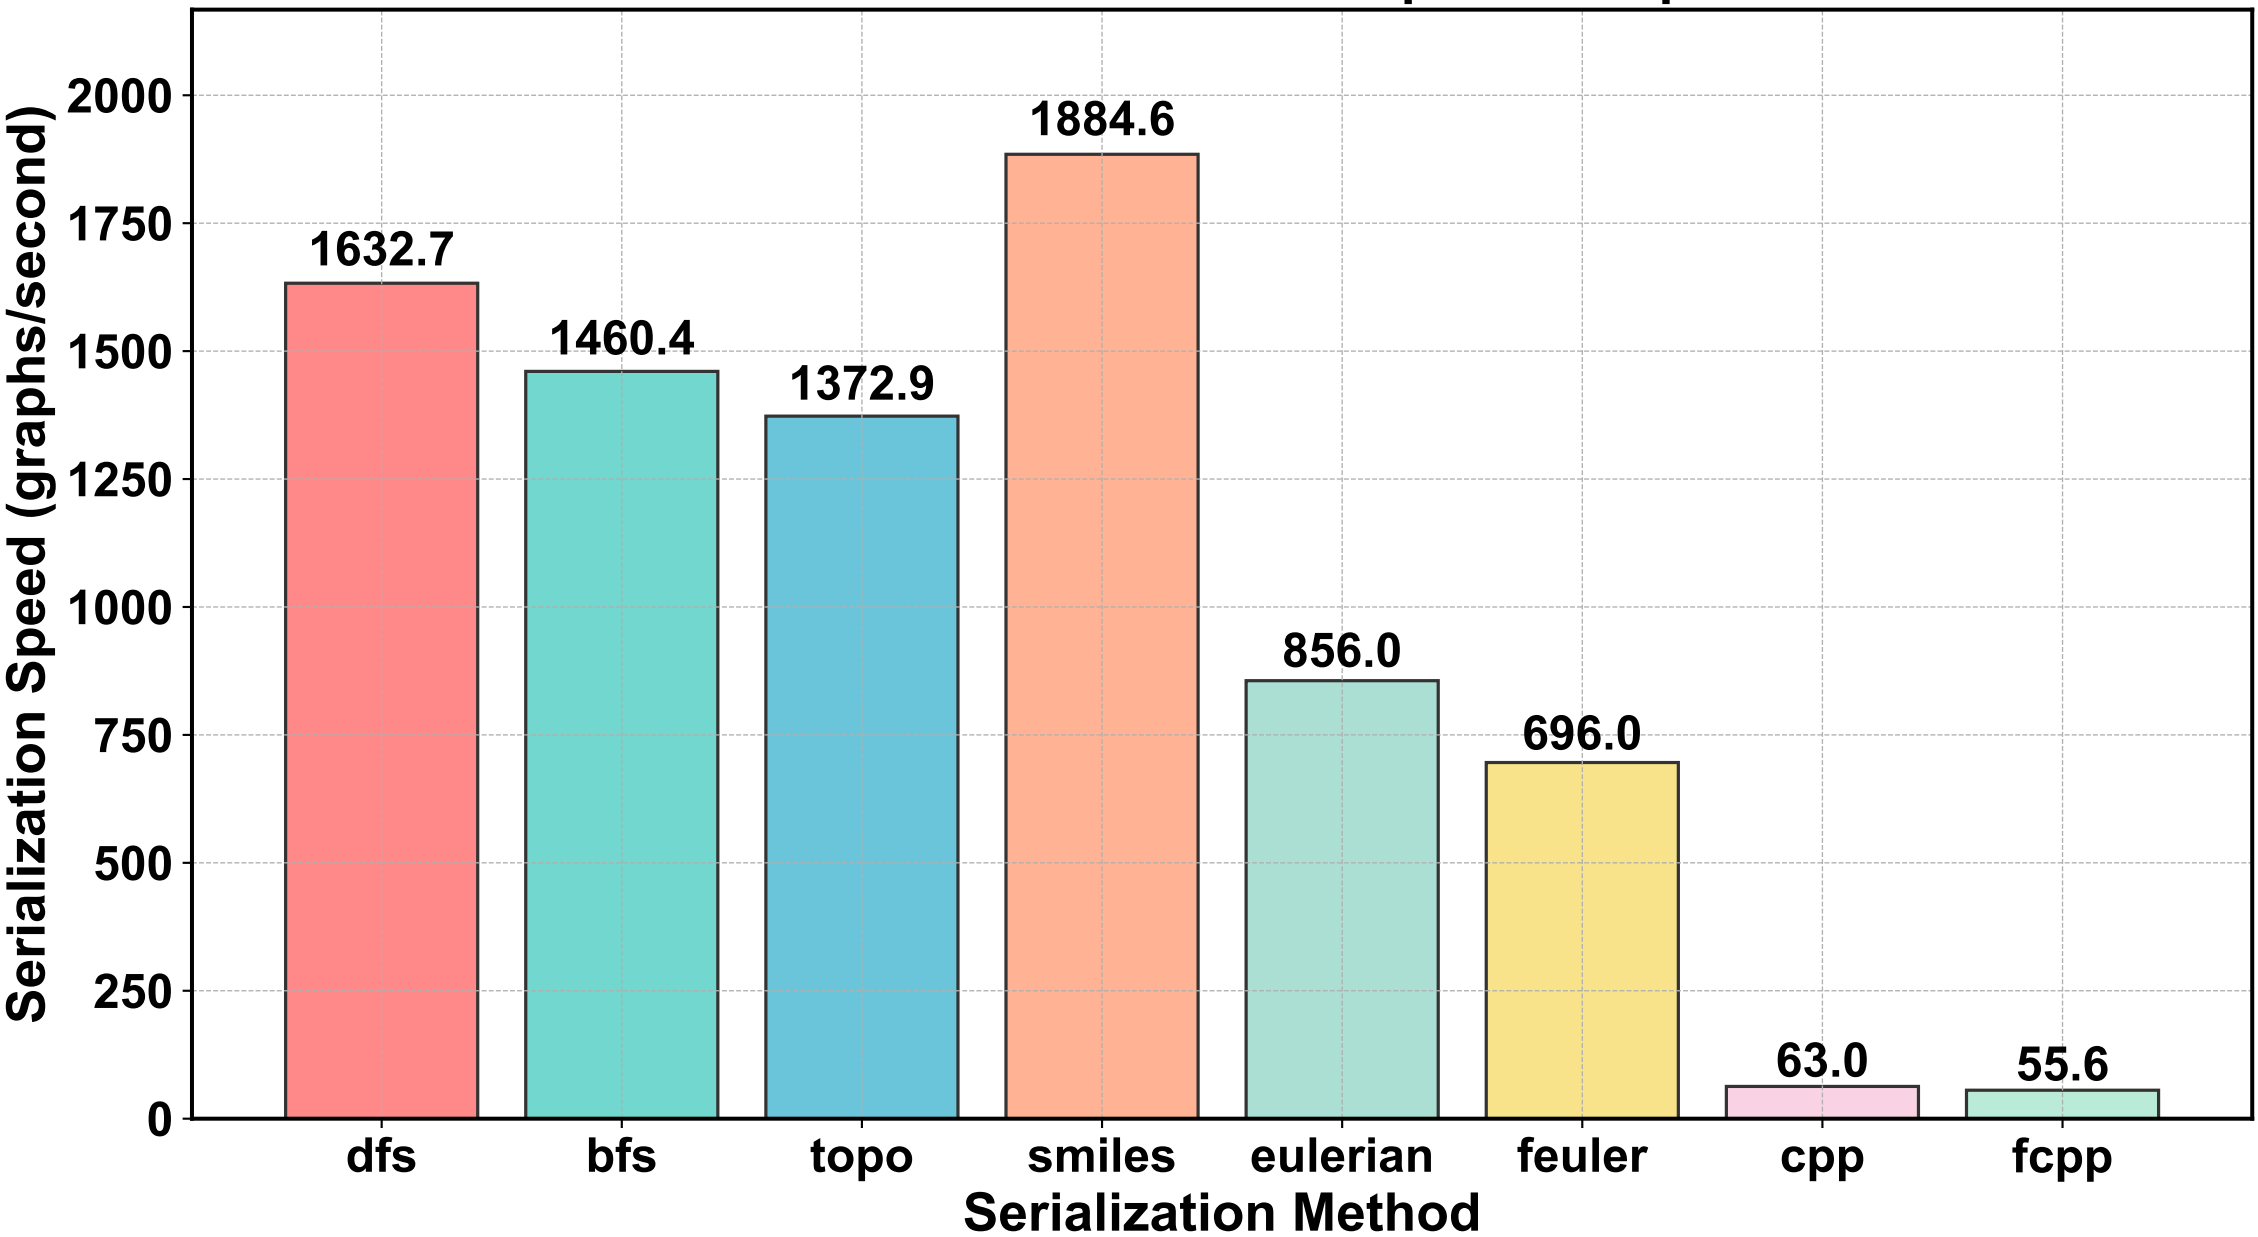

Supplement: supplementary_material [file AQSOL_serialization_speed.pdf › submit_GraphTokenizer/submit_GraphTokenizer/final/exp1_speed/serialize_time/AQSOL_serialization_speed.pdf]

**COILDEL Dataset - Serialization Speed Comparison**

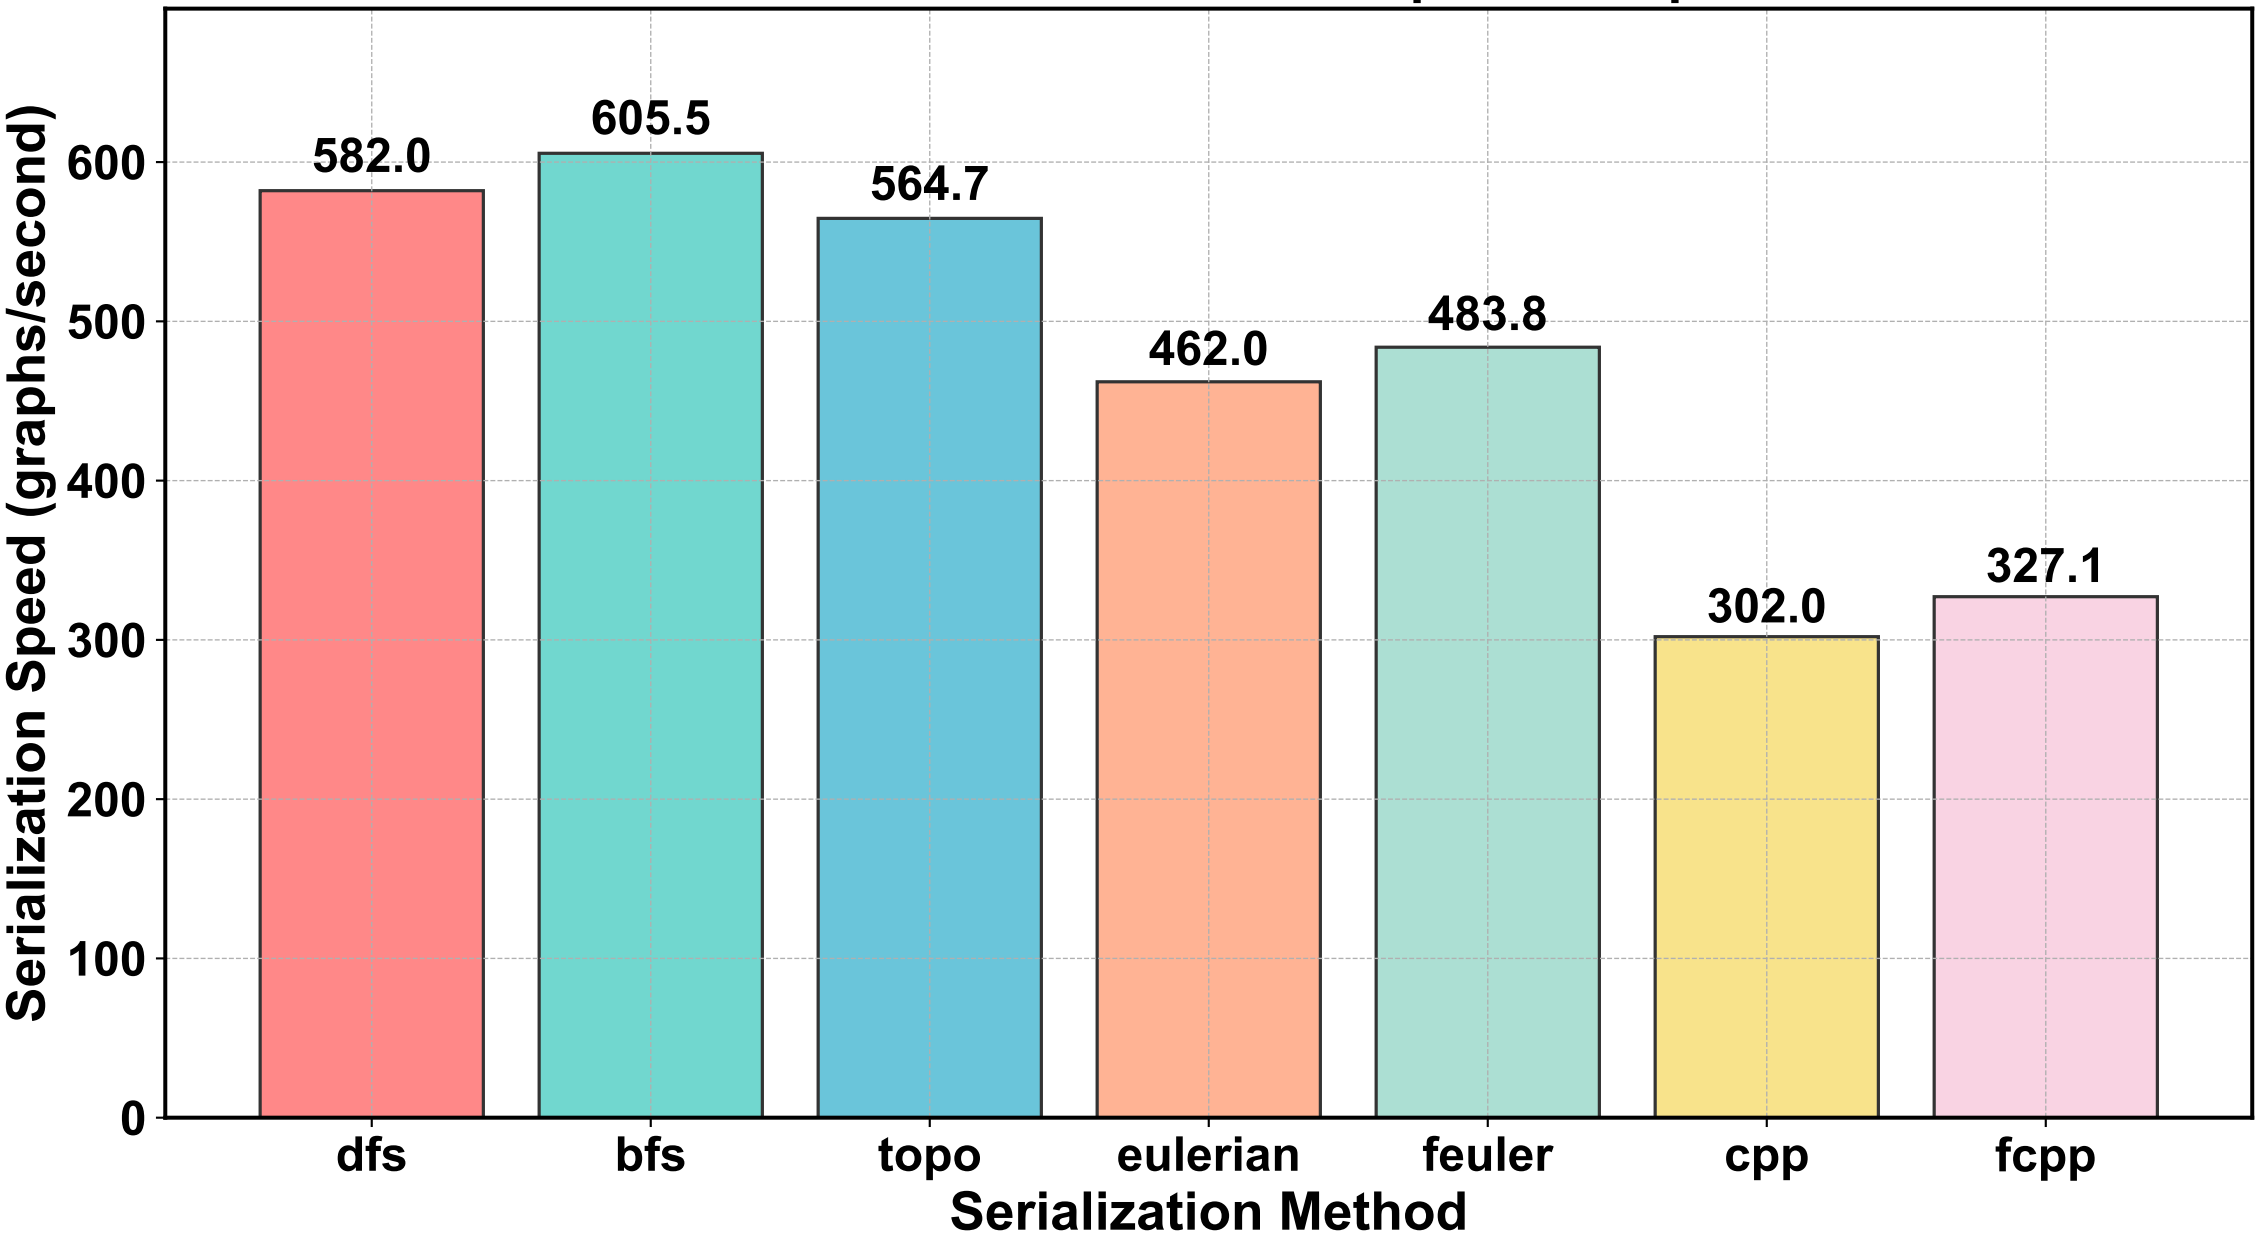

Supplement: supplementary_material [file COILDEL_serialization_speed.pdf › submit_GraphTokenizer/submit_GraphTokenizer/final/exp1_speed/serialize_time/COILDEL_serialization_speed.pdf]

**COLORS3 Dataset - Serialization Speed Comparison**

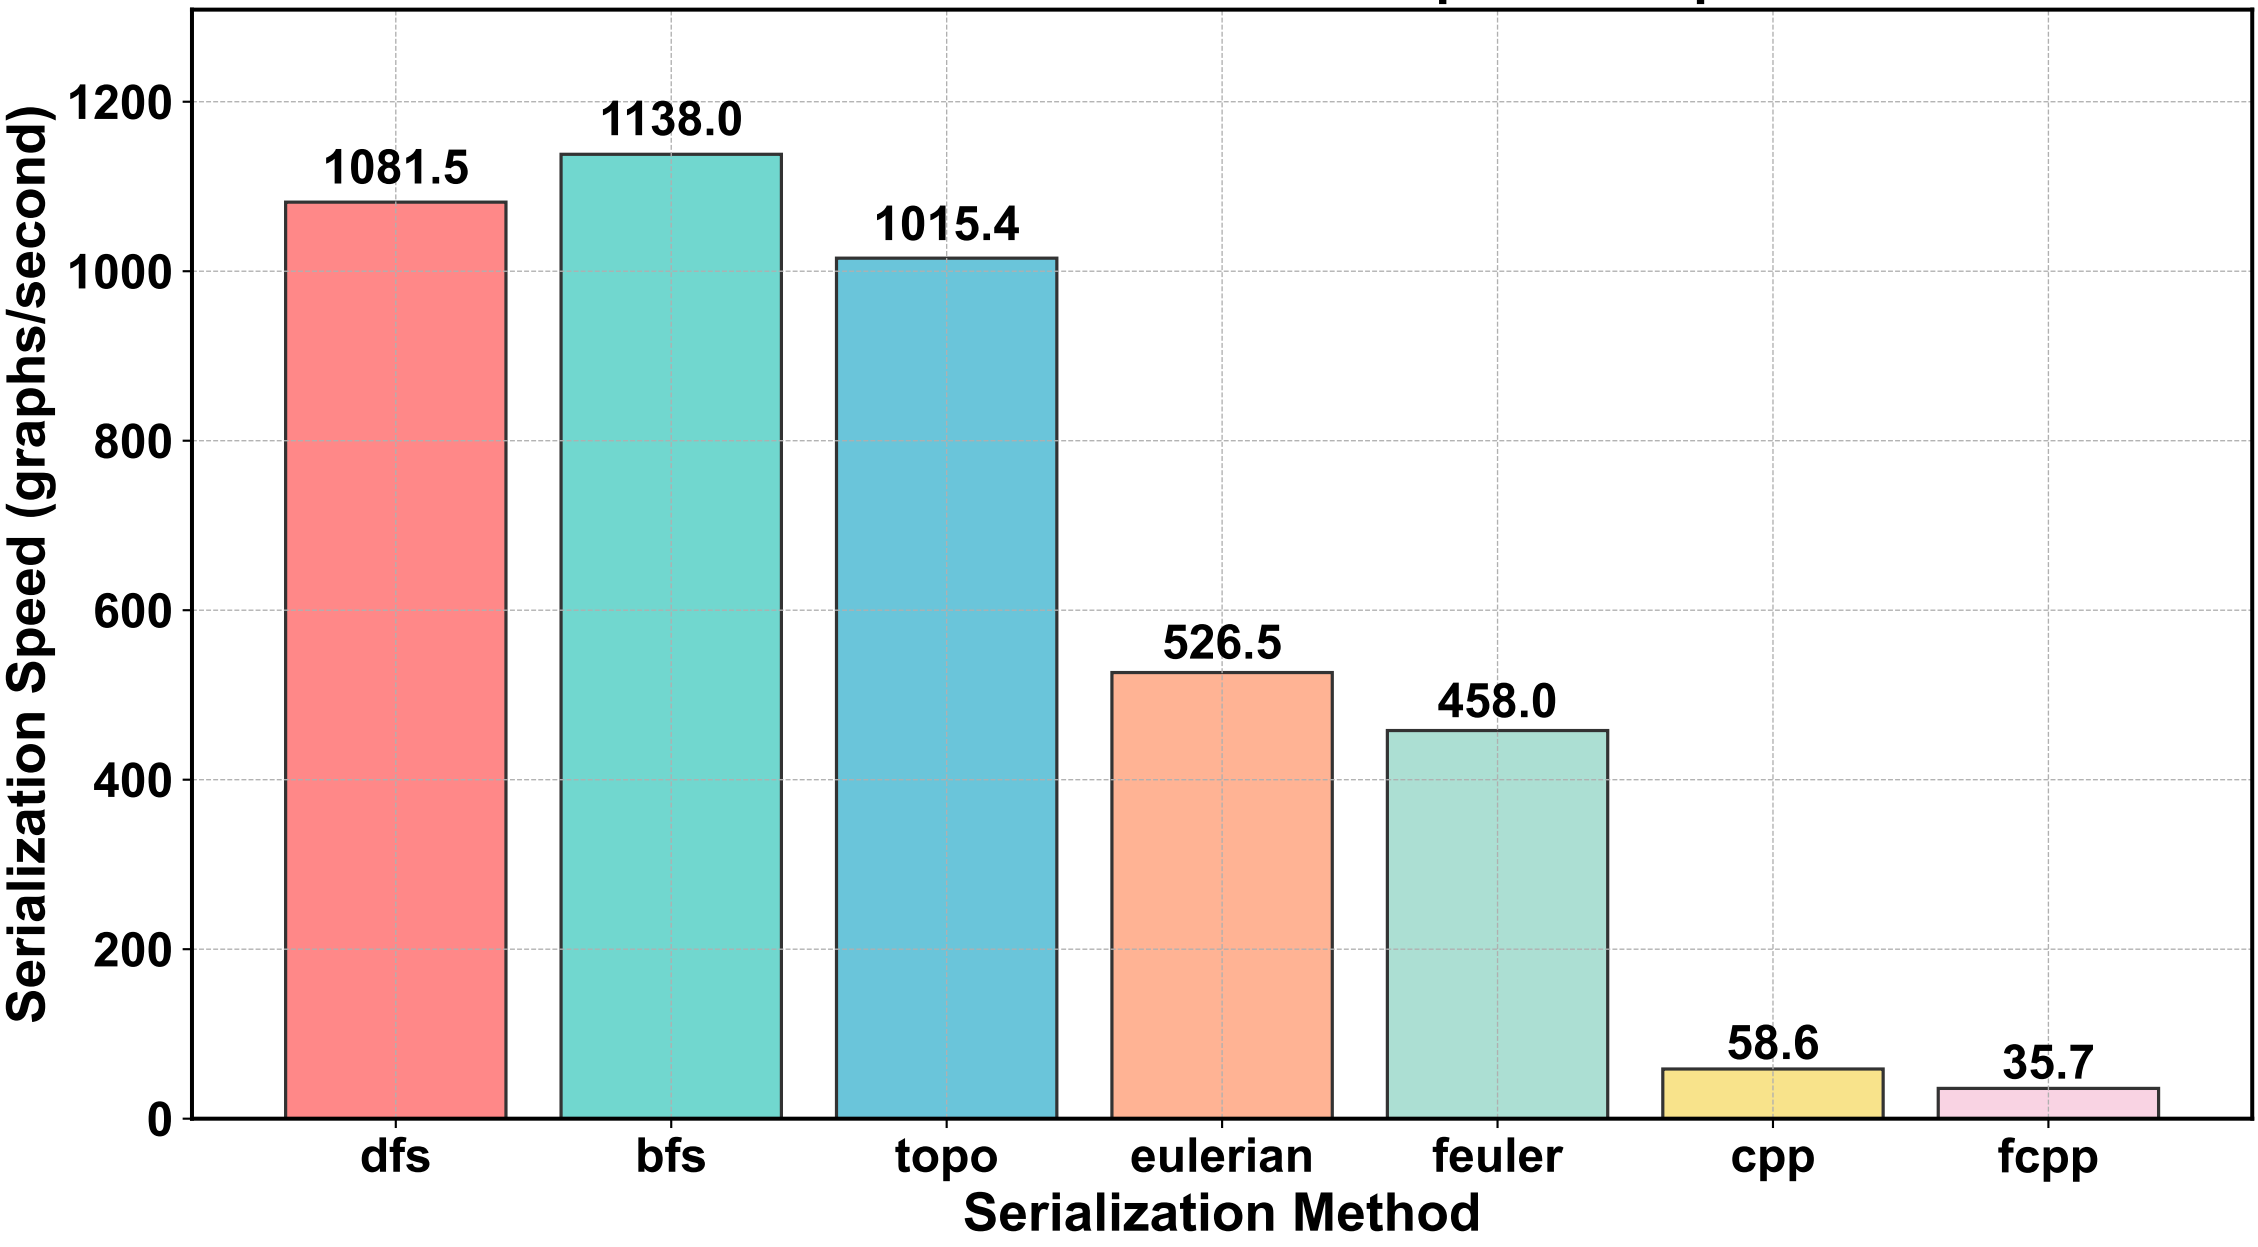

Supplement: supplementary_material [file COLORS3_serialization_speed.pdf › submit_GraphTokenizer/submit_GraphTokenizer/final/exp1_speed/serialize_time/COLORS3_serialization_speed.pdf]

**DBLP Dataset - Serialization Speed Comparison**

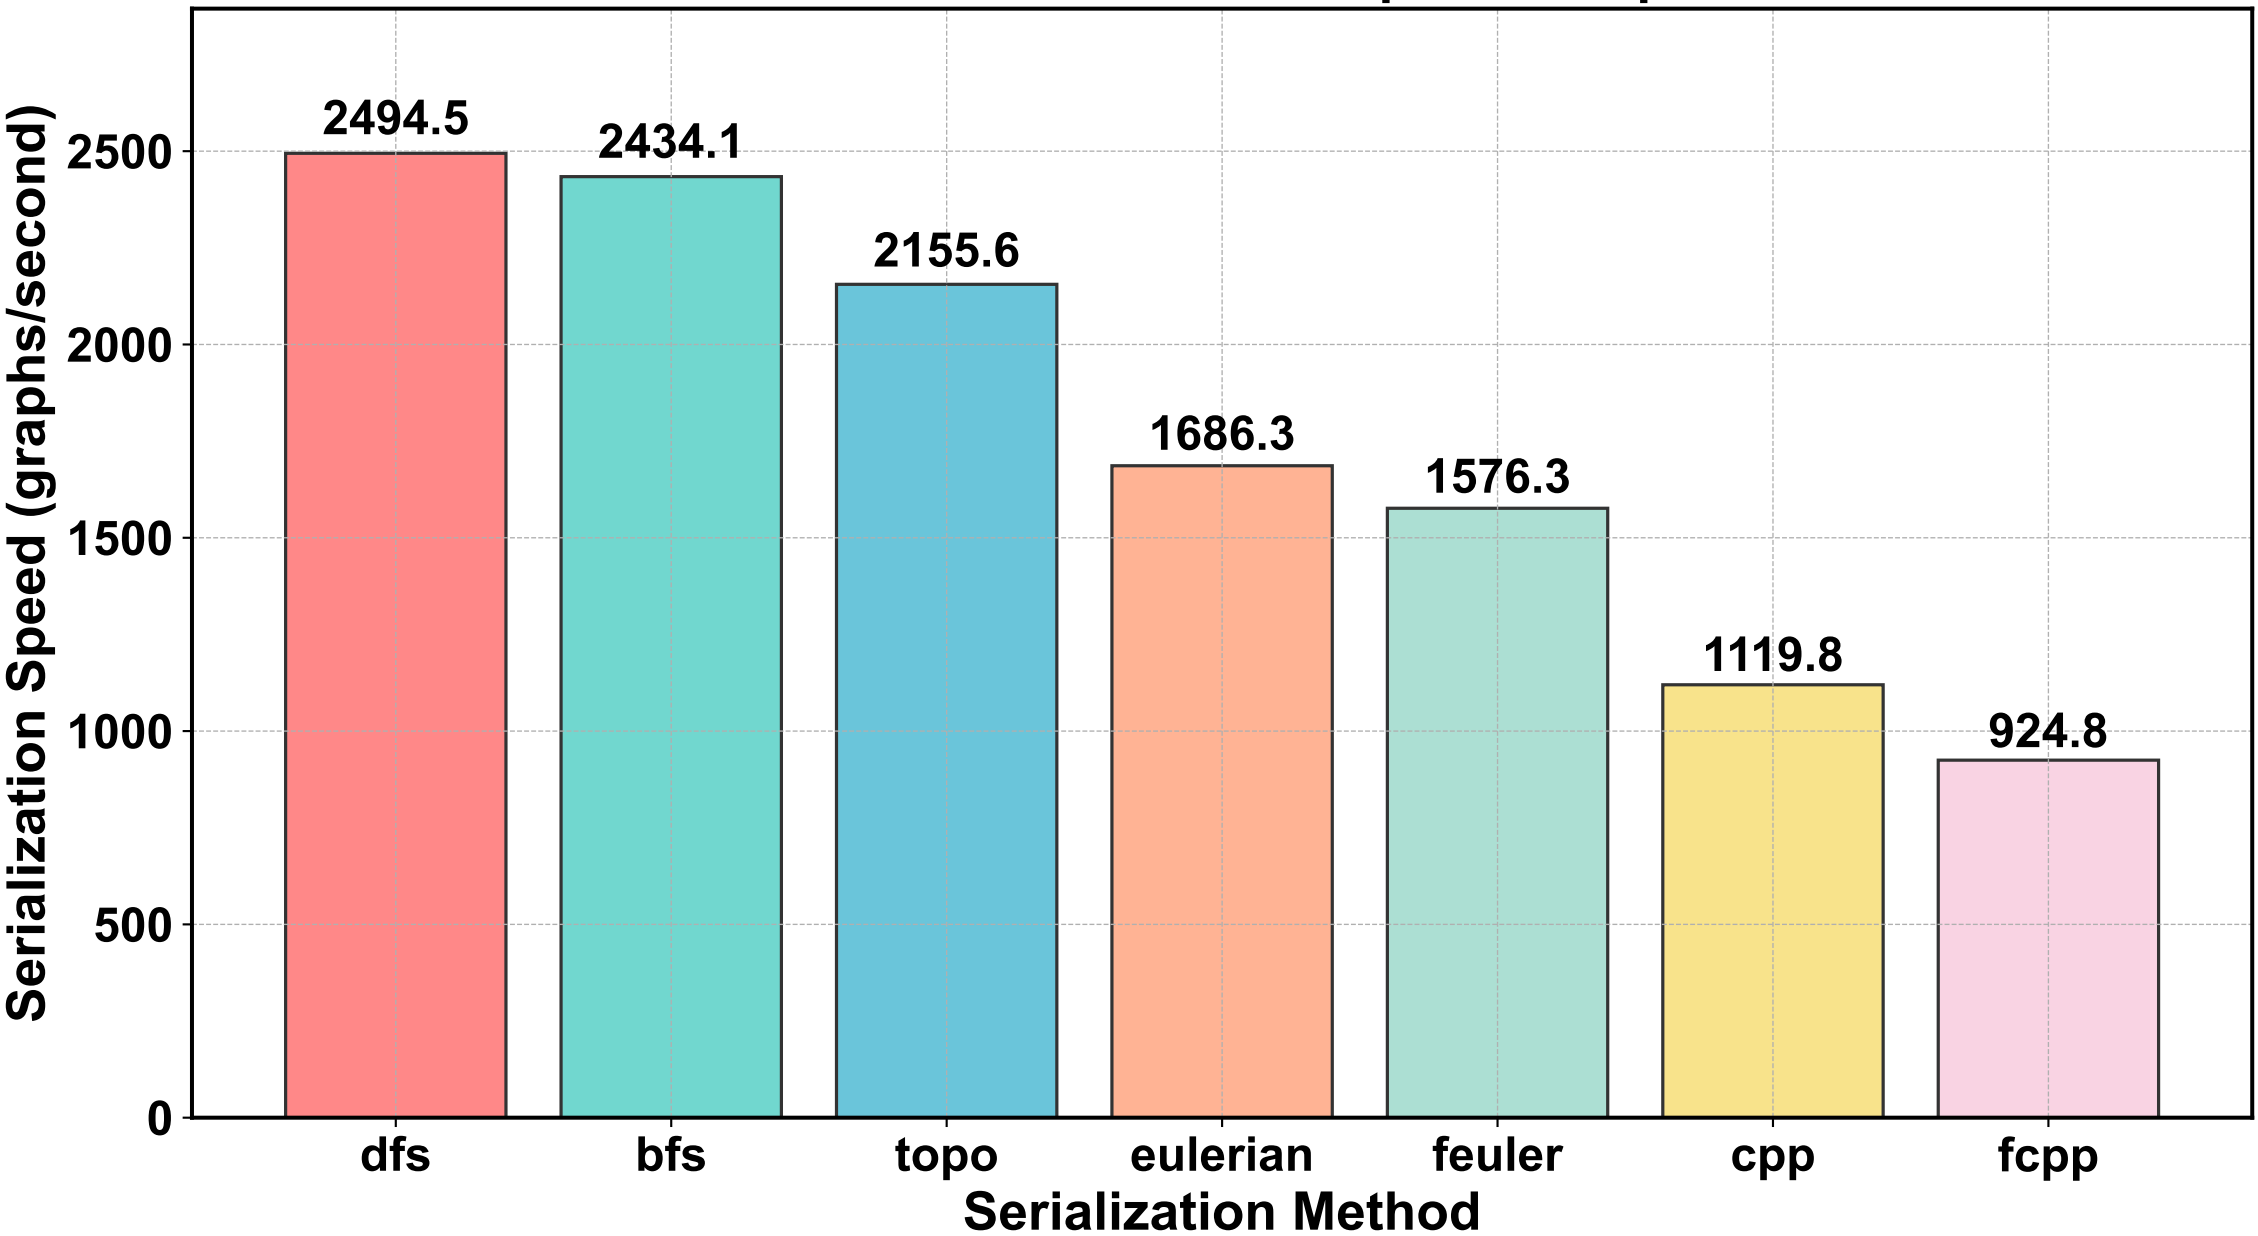

Supplement: supplementary_material [file DBLP_serialization_speed.pdf › submit_GraphTokenizer/submit_GraphTokenizer/final/exp1_speed/serialize_time/DBLP_serialization_speed.pdf]

**DD Dataset - Serialization Speed Comparison**

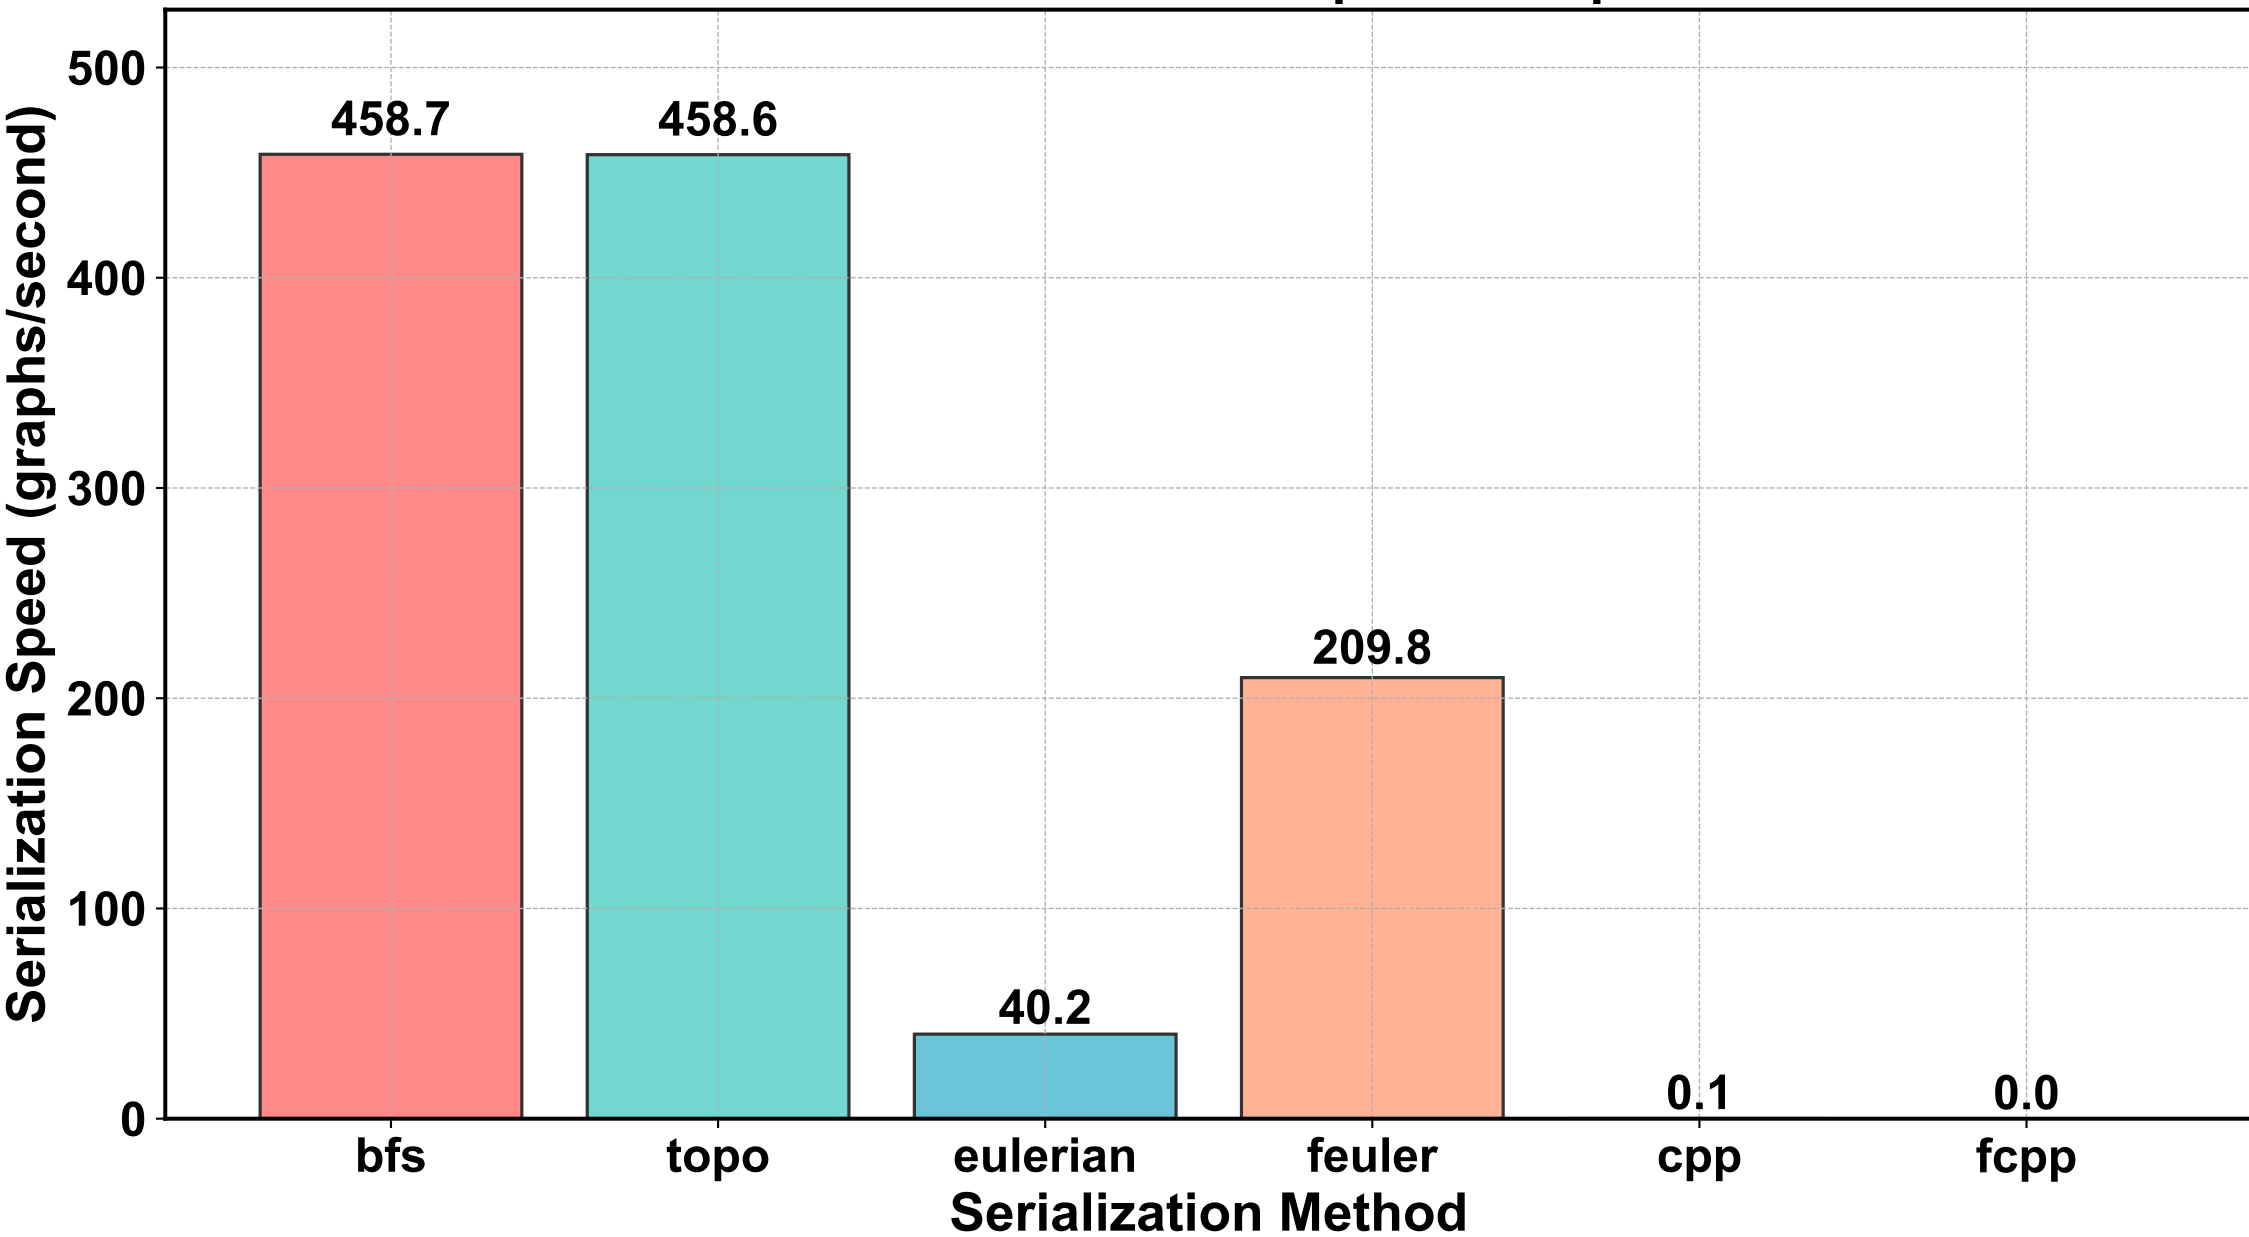

Supplement: supplementary_material [file DD_serialization_speed.pdf › submit_GraphTokenizer/submit_GraphTokenizer/final/exp1_speed/serialize_time/DD_serialization_speed.pdf]

**MOLHIV Dataset - Serialization Speed Comparison**

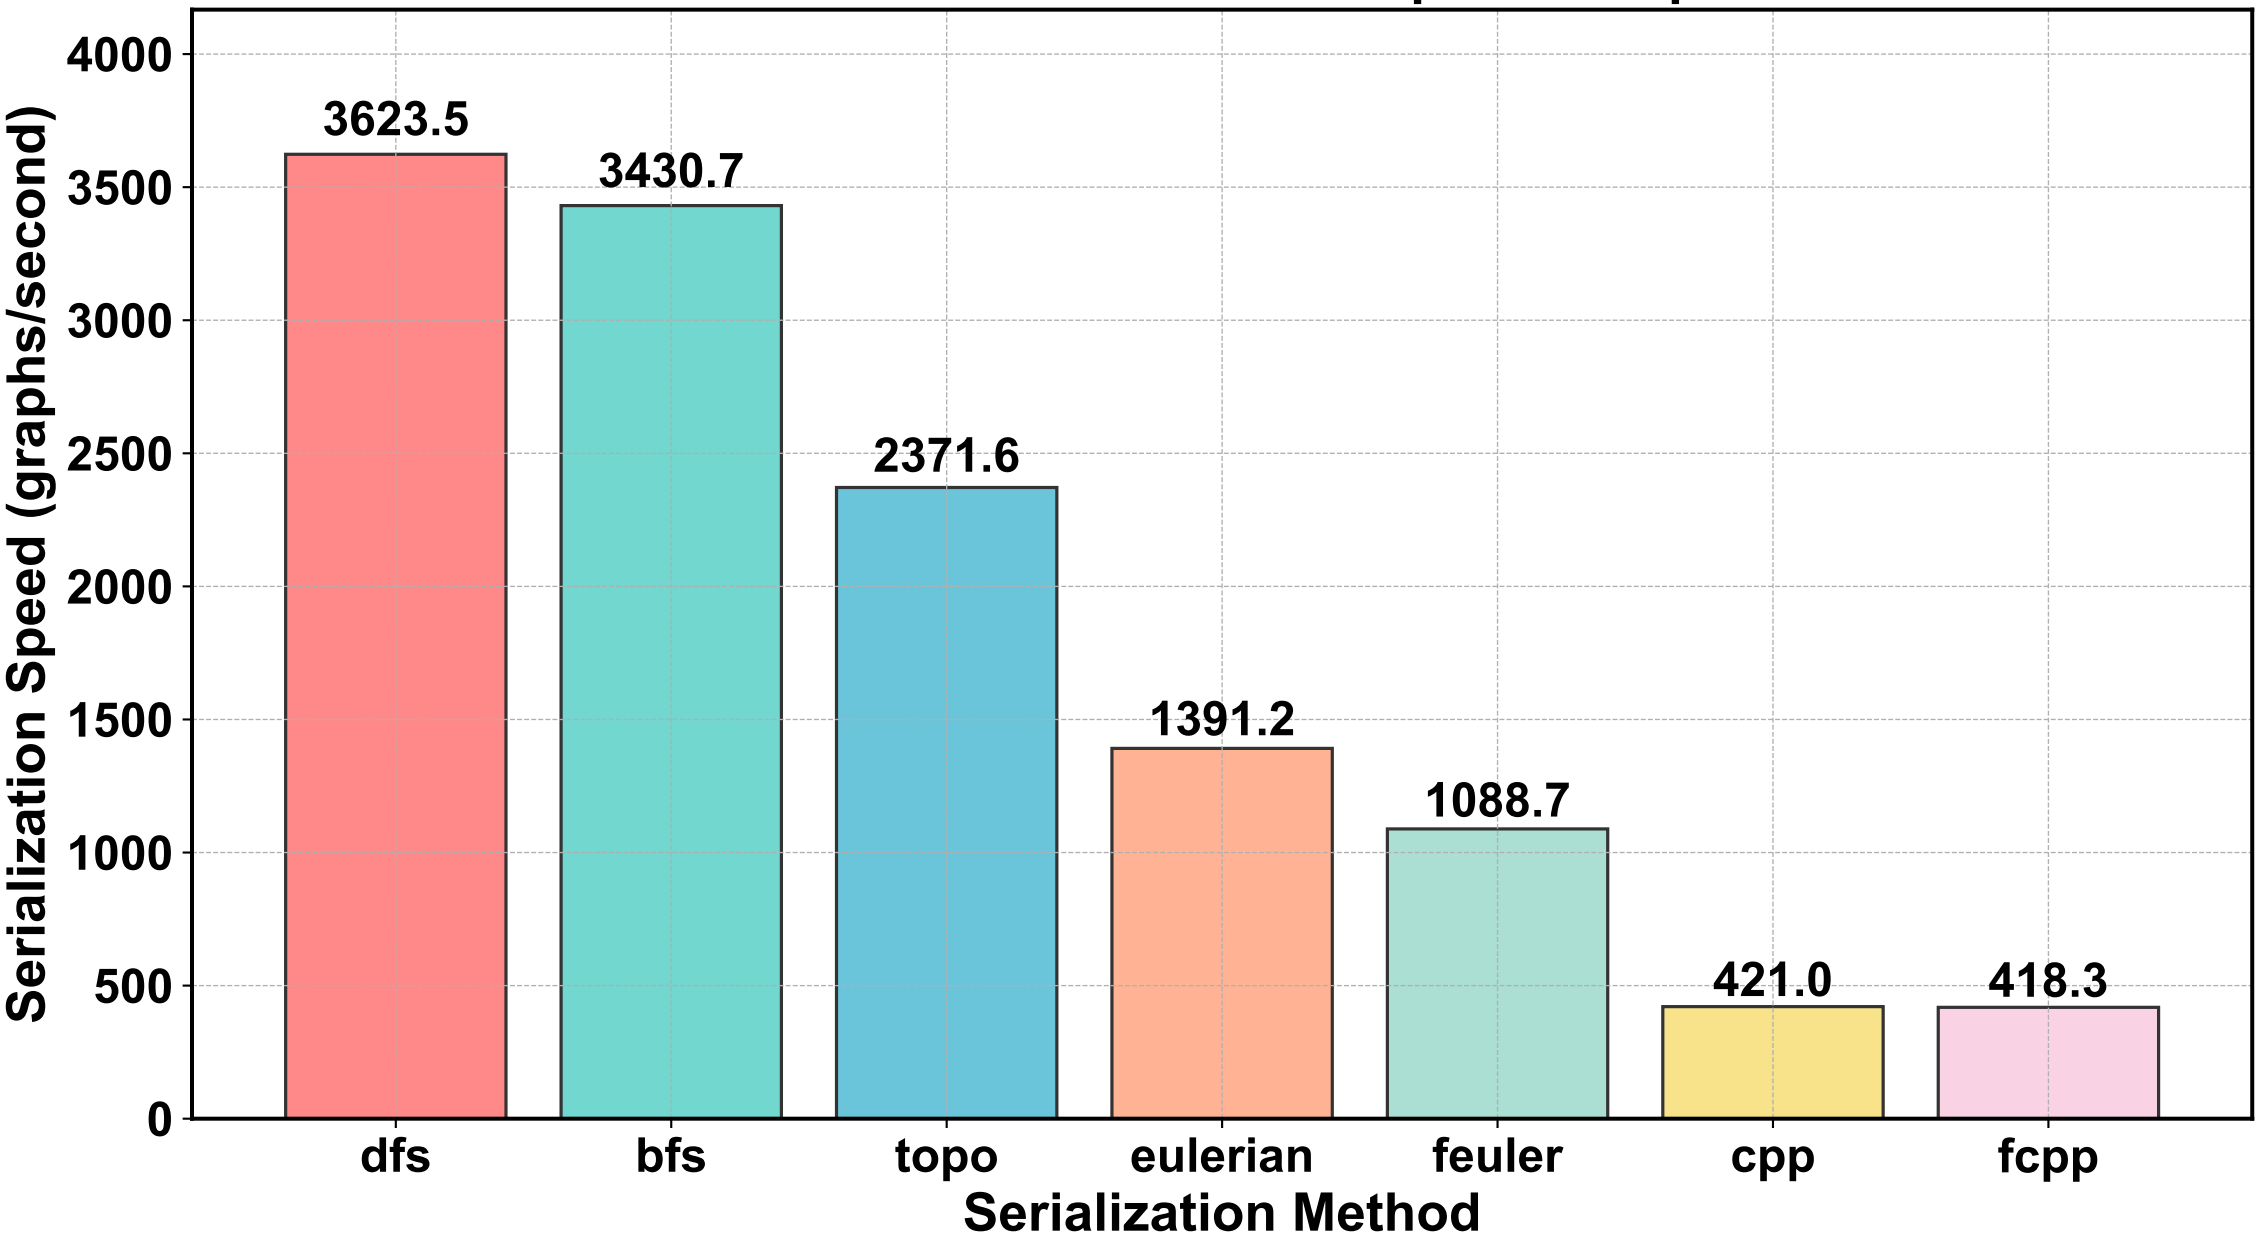

Supplement: supplementary_material [file MOLHIV_serialization_speed.pdf › submit_GraphTokenizer/submit_GraphTokenizer/final/exp1_speed/serialize_time/MOLHIV_serialization_speed.pdf]

**MUTAGENICITY Dataset - Serialization Speed Comparison**

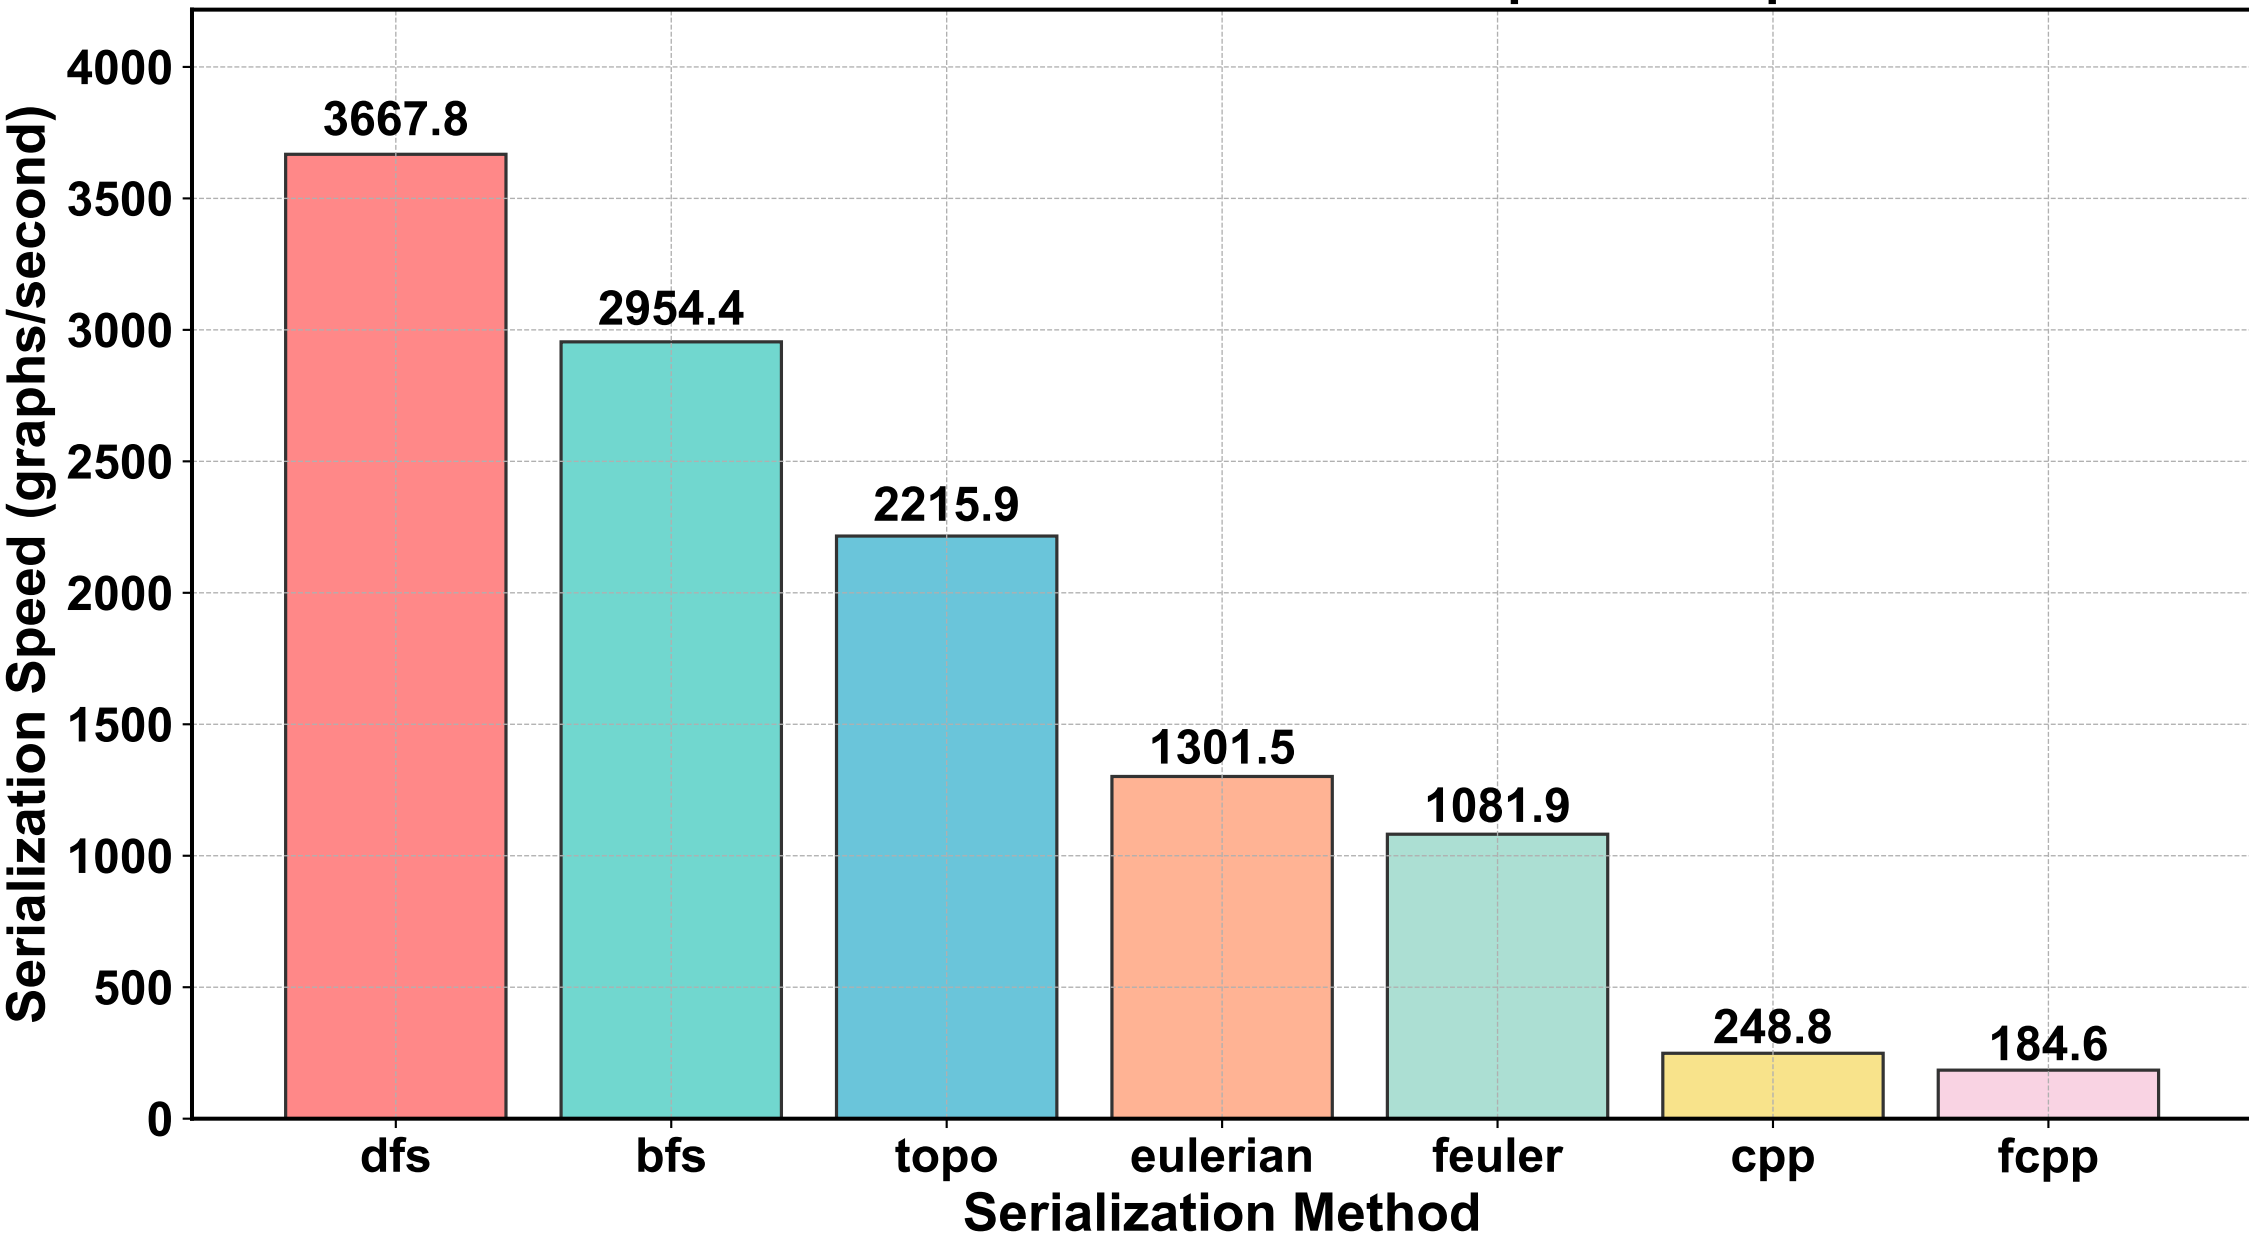

Supplement: supplementary_material [file MUTAGENICITY_serialization_speed.pdf › submit_GraphTokenizer/submit_GraphTokenizer/final/exp1_speed/serialize_time/MUTAGENICITY_serialization_speed.pdf]

**PEPTIDES\_FUNC Dataset - Serialization Speed Comparison**

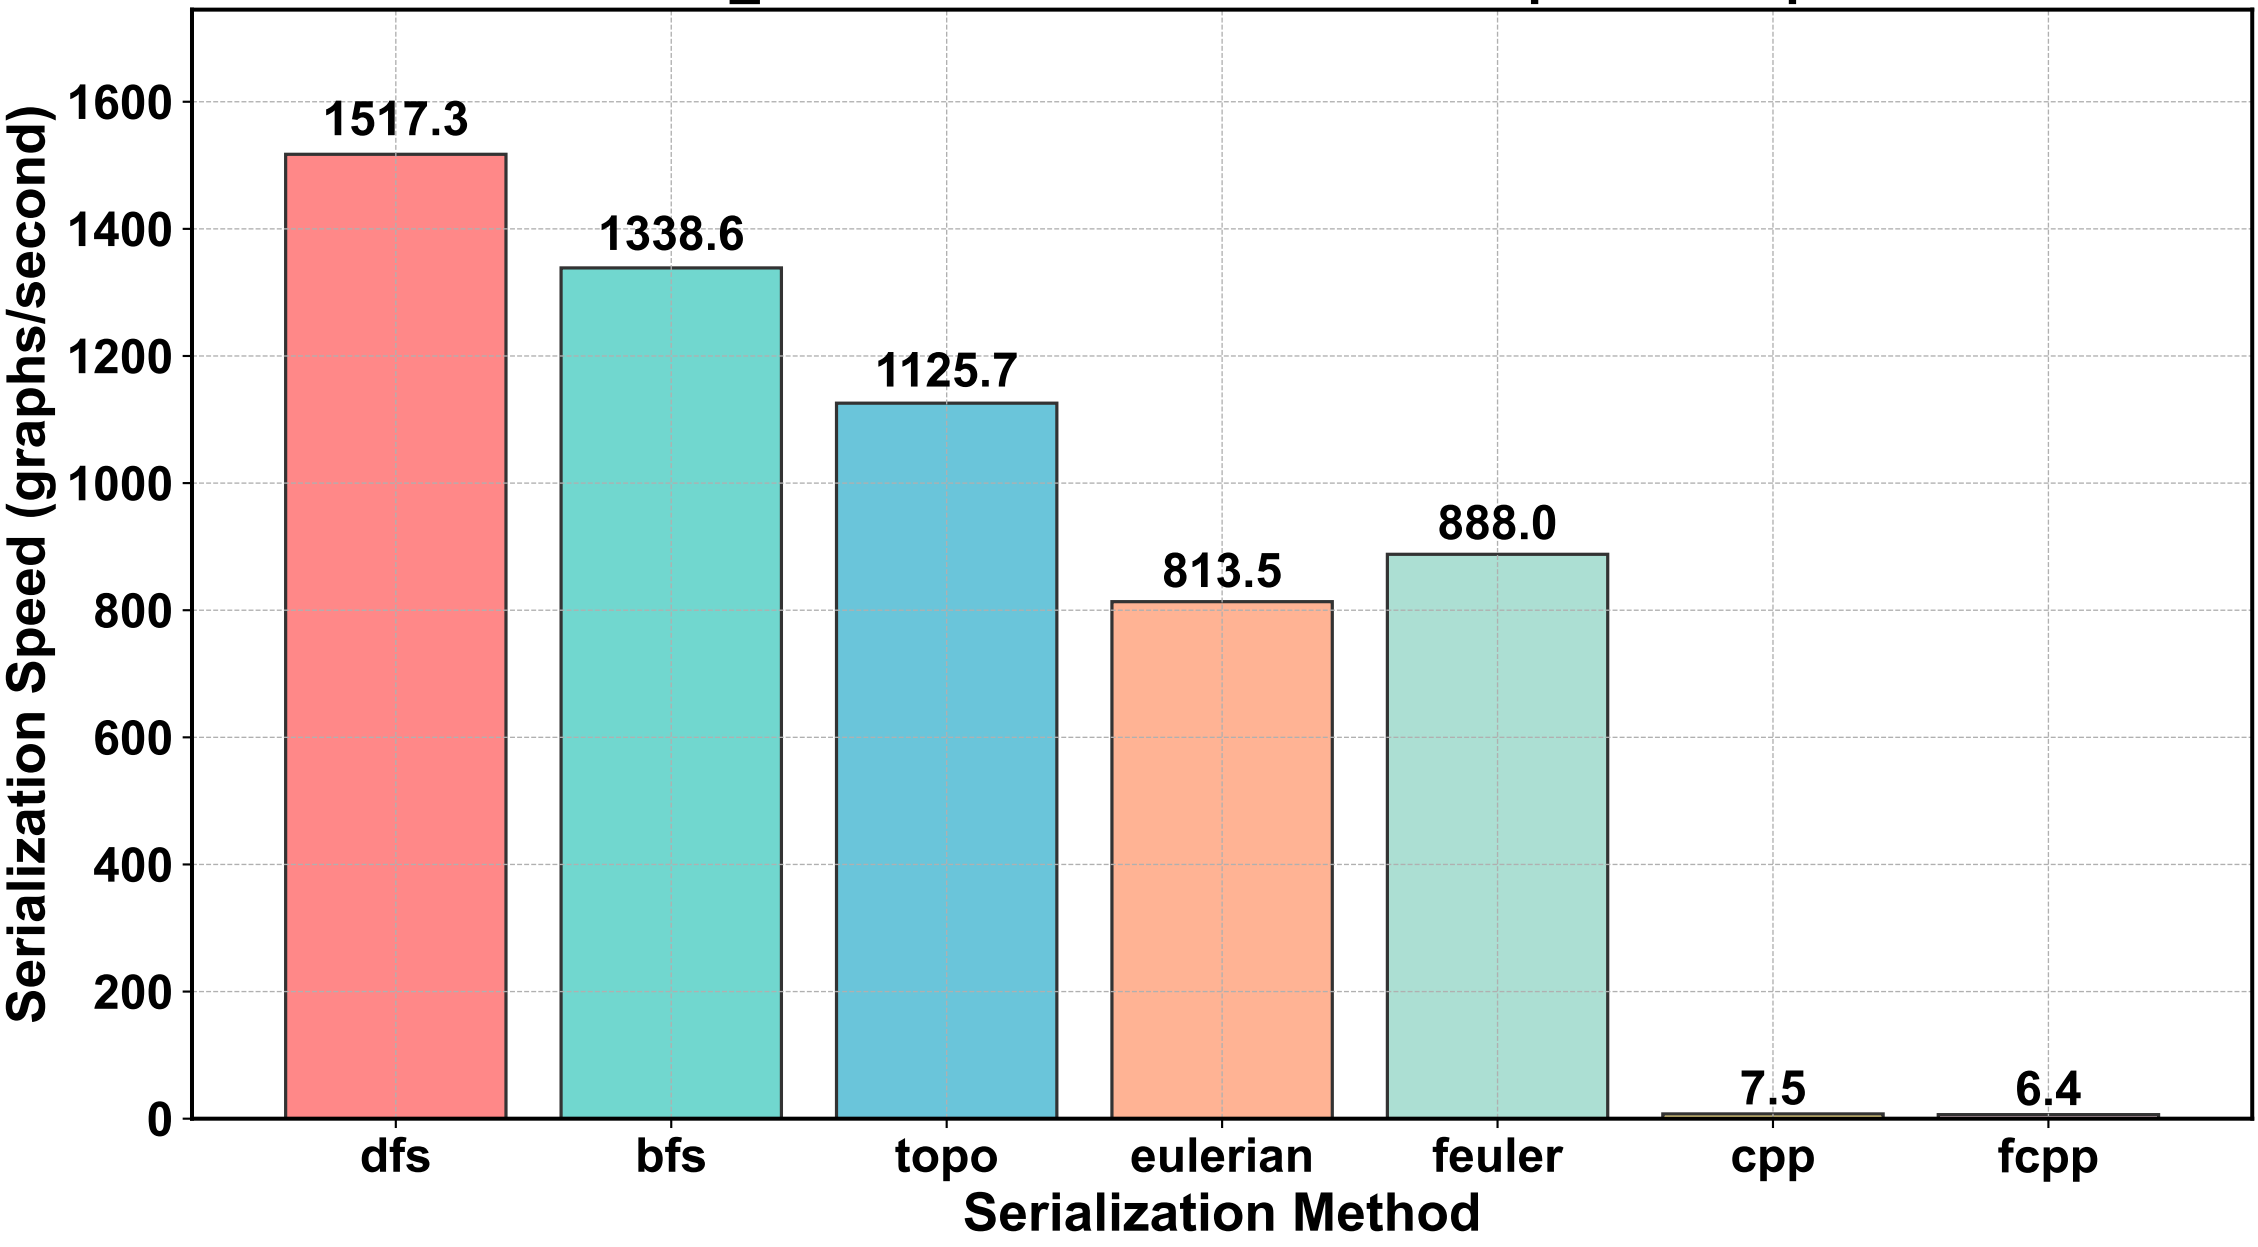

Supplement: supplementary_material [file PEPTIDES_FUNC_serialization_speed.pdf › submit_GraphTokenizer/submit_GraphTokenizer/final/exp1_speed/serialize_time/PEPTIDES_FUNC_serialization_speed.pdf]

**QM9TEST Dataset - Serialization Speed Comparison**

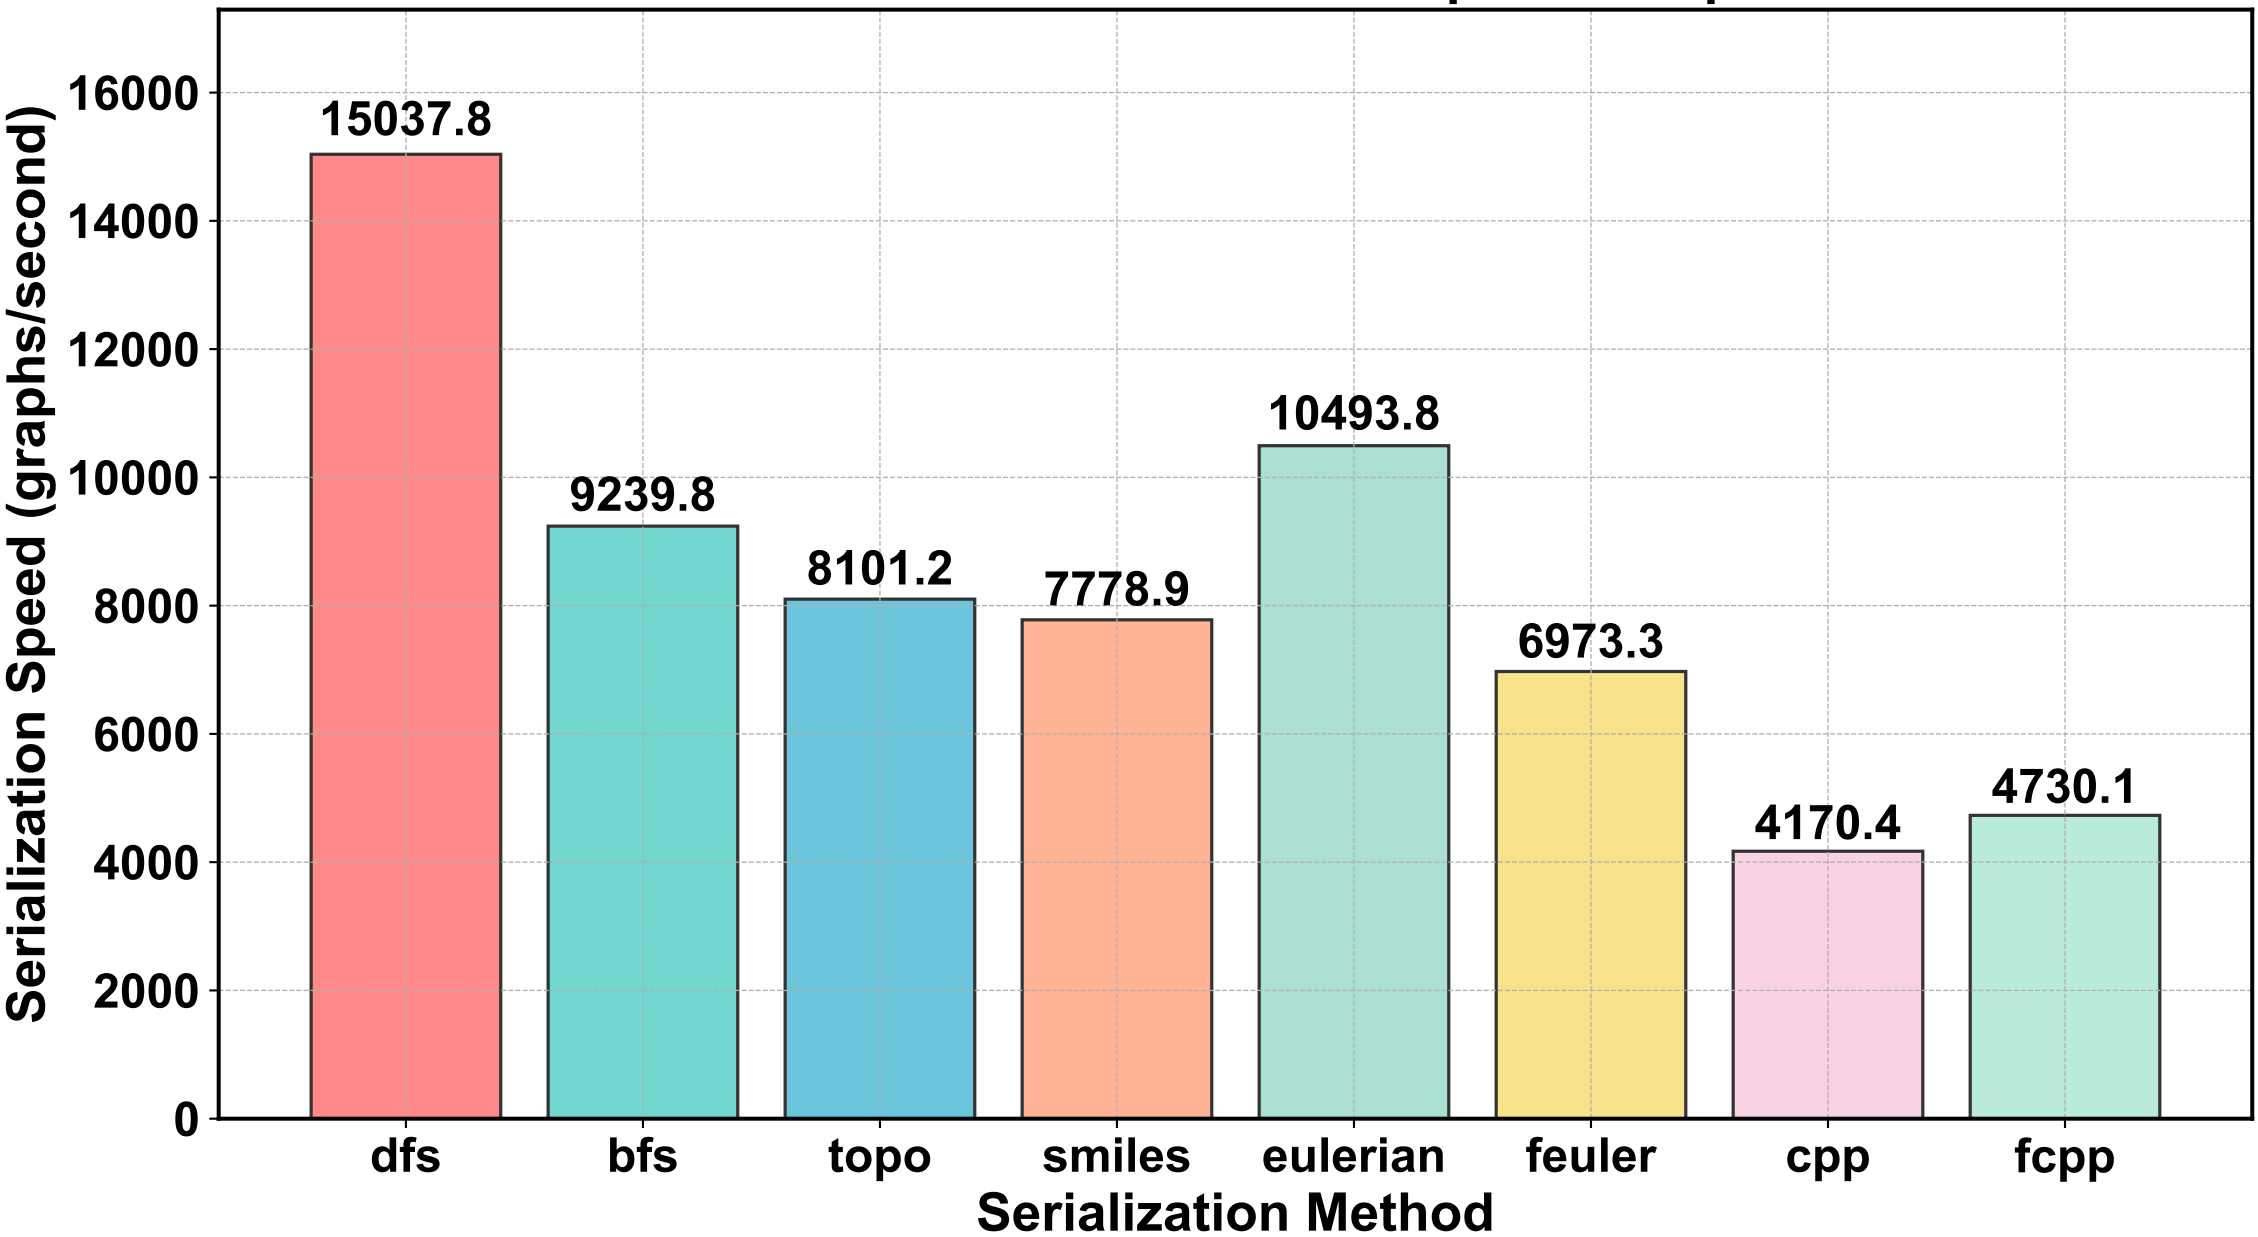

Supplement: supplementary_material [file QM9TEST_serialization_speed.pdf › submit_GraphTokenizer/submit_GraphTokenizer/final/exp1_speed/serialize_time/QM9TEST_serialization_speed.pdf]

# QM9 Dataset - Serialization Speed Comparison

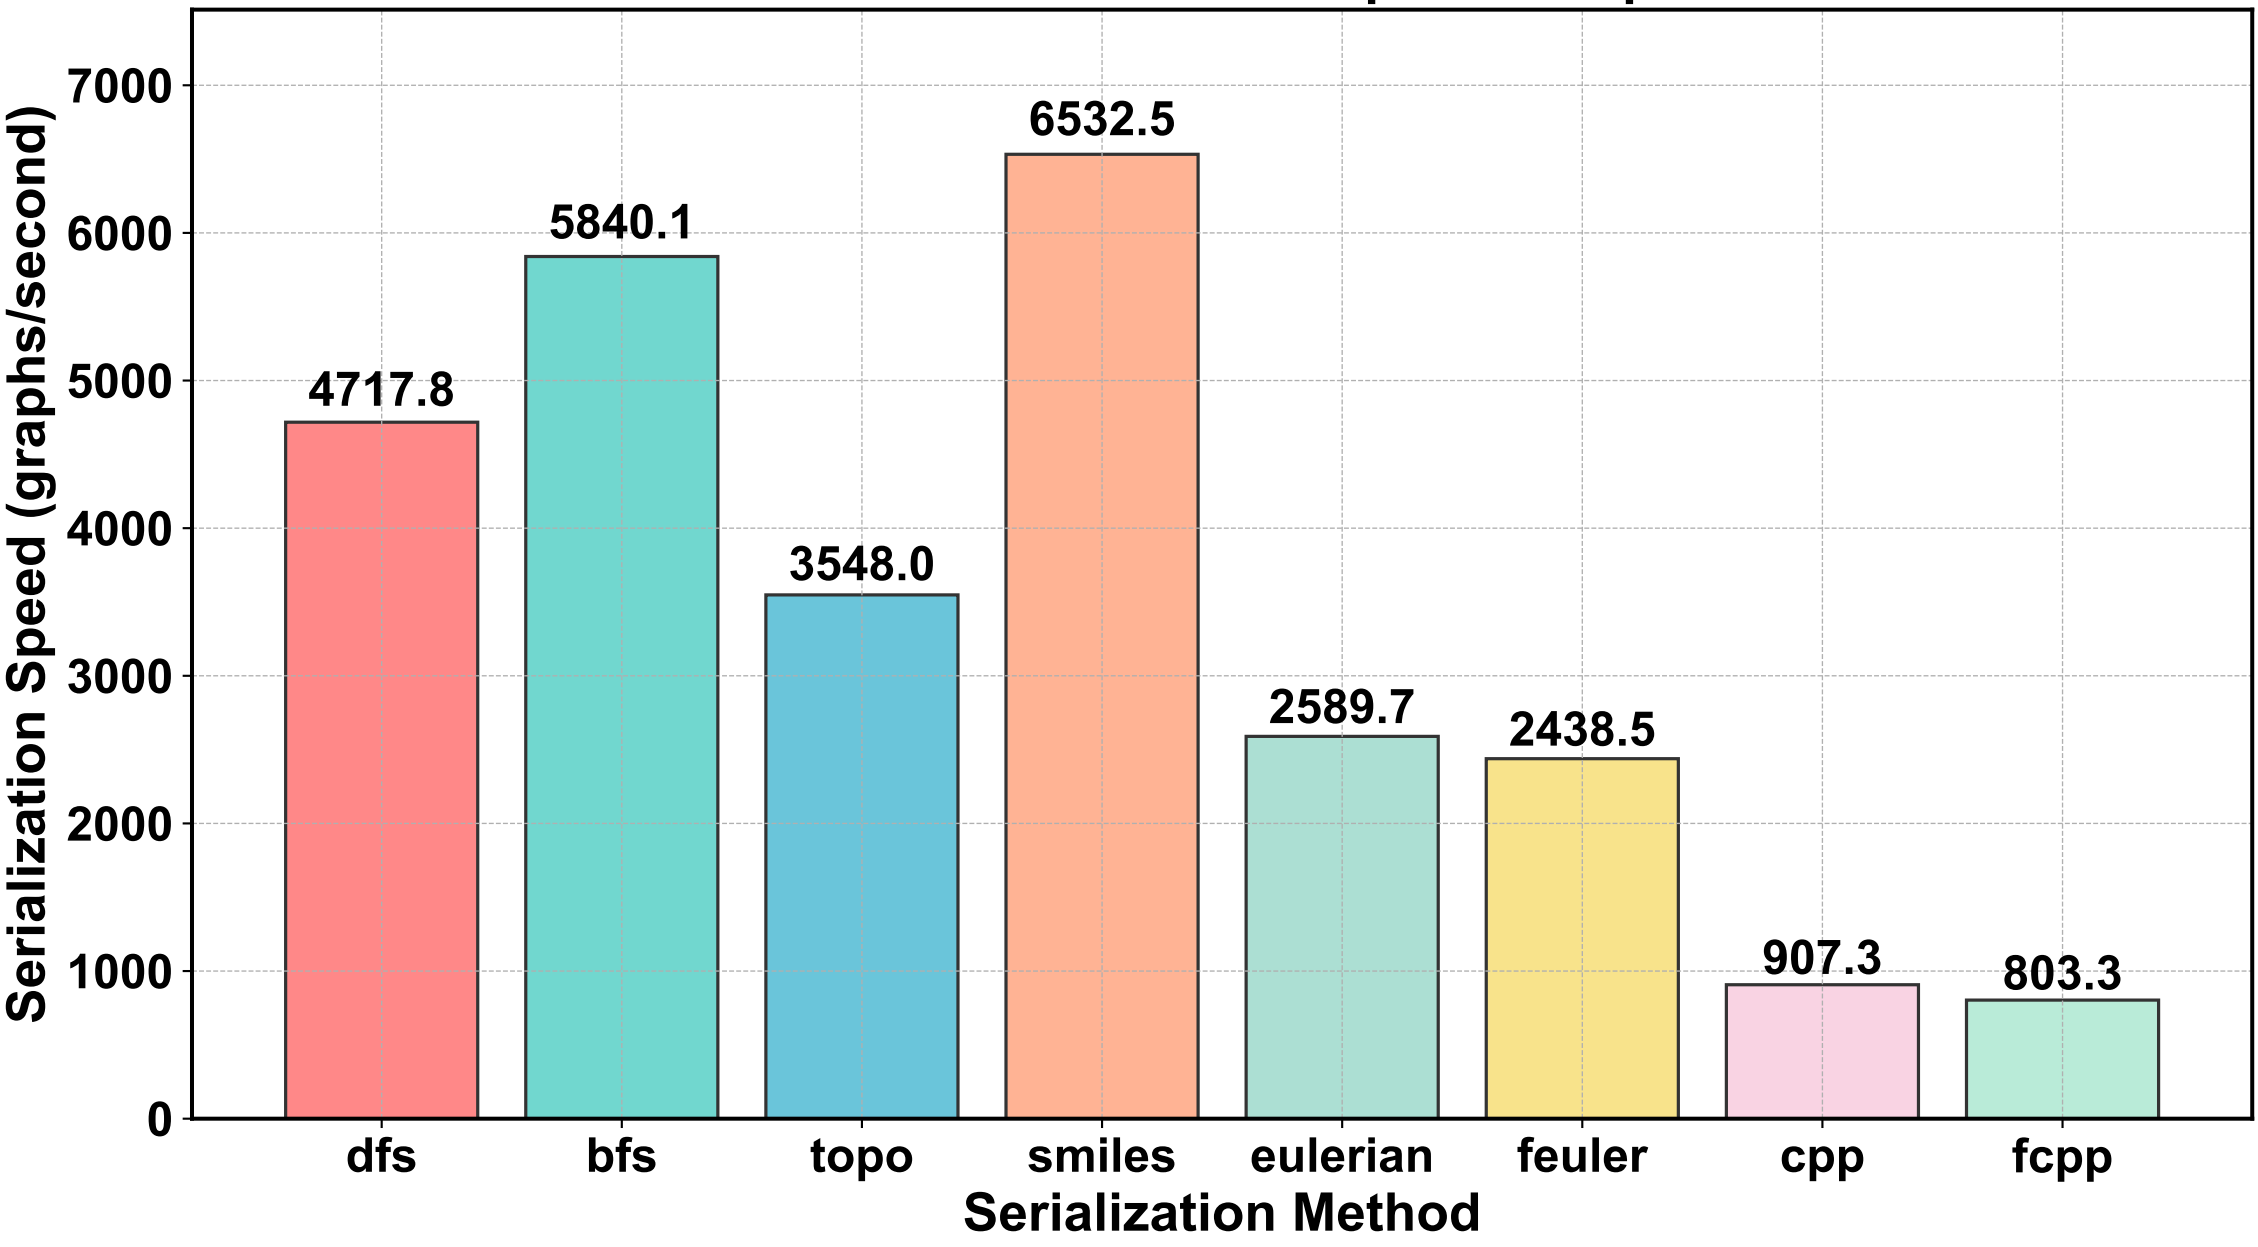

Supplement: supplementary_material [file QM9_serialization_speed.pdf › submit_GraphTokenizer/submit_GraphTokenizer/final/exp1_speed/serialize_time/QM9_serialization_speed.pdf]

**SYNTHETIC Dataset - Serialization Speed Comparison**

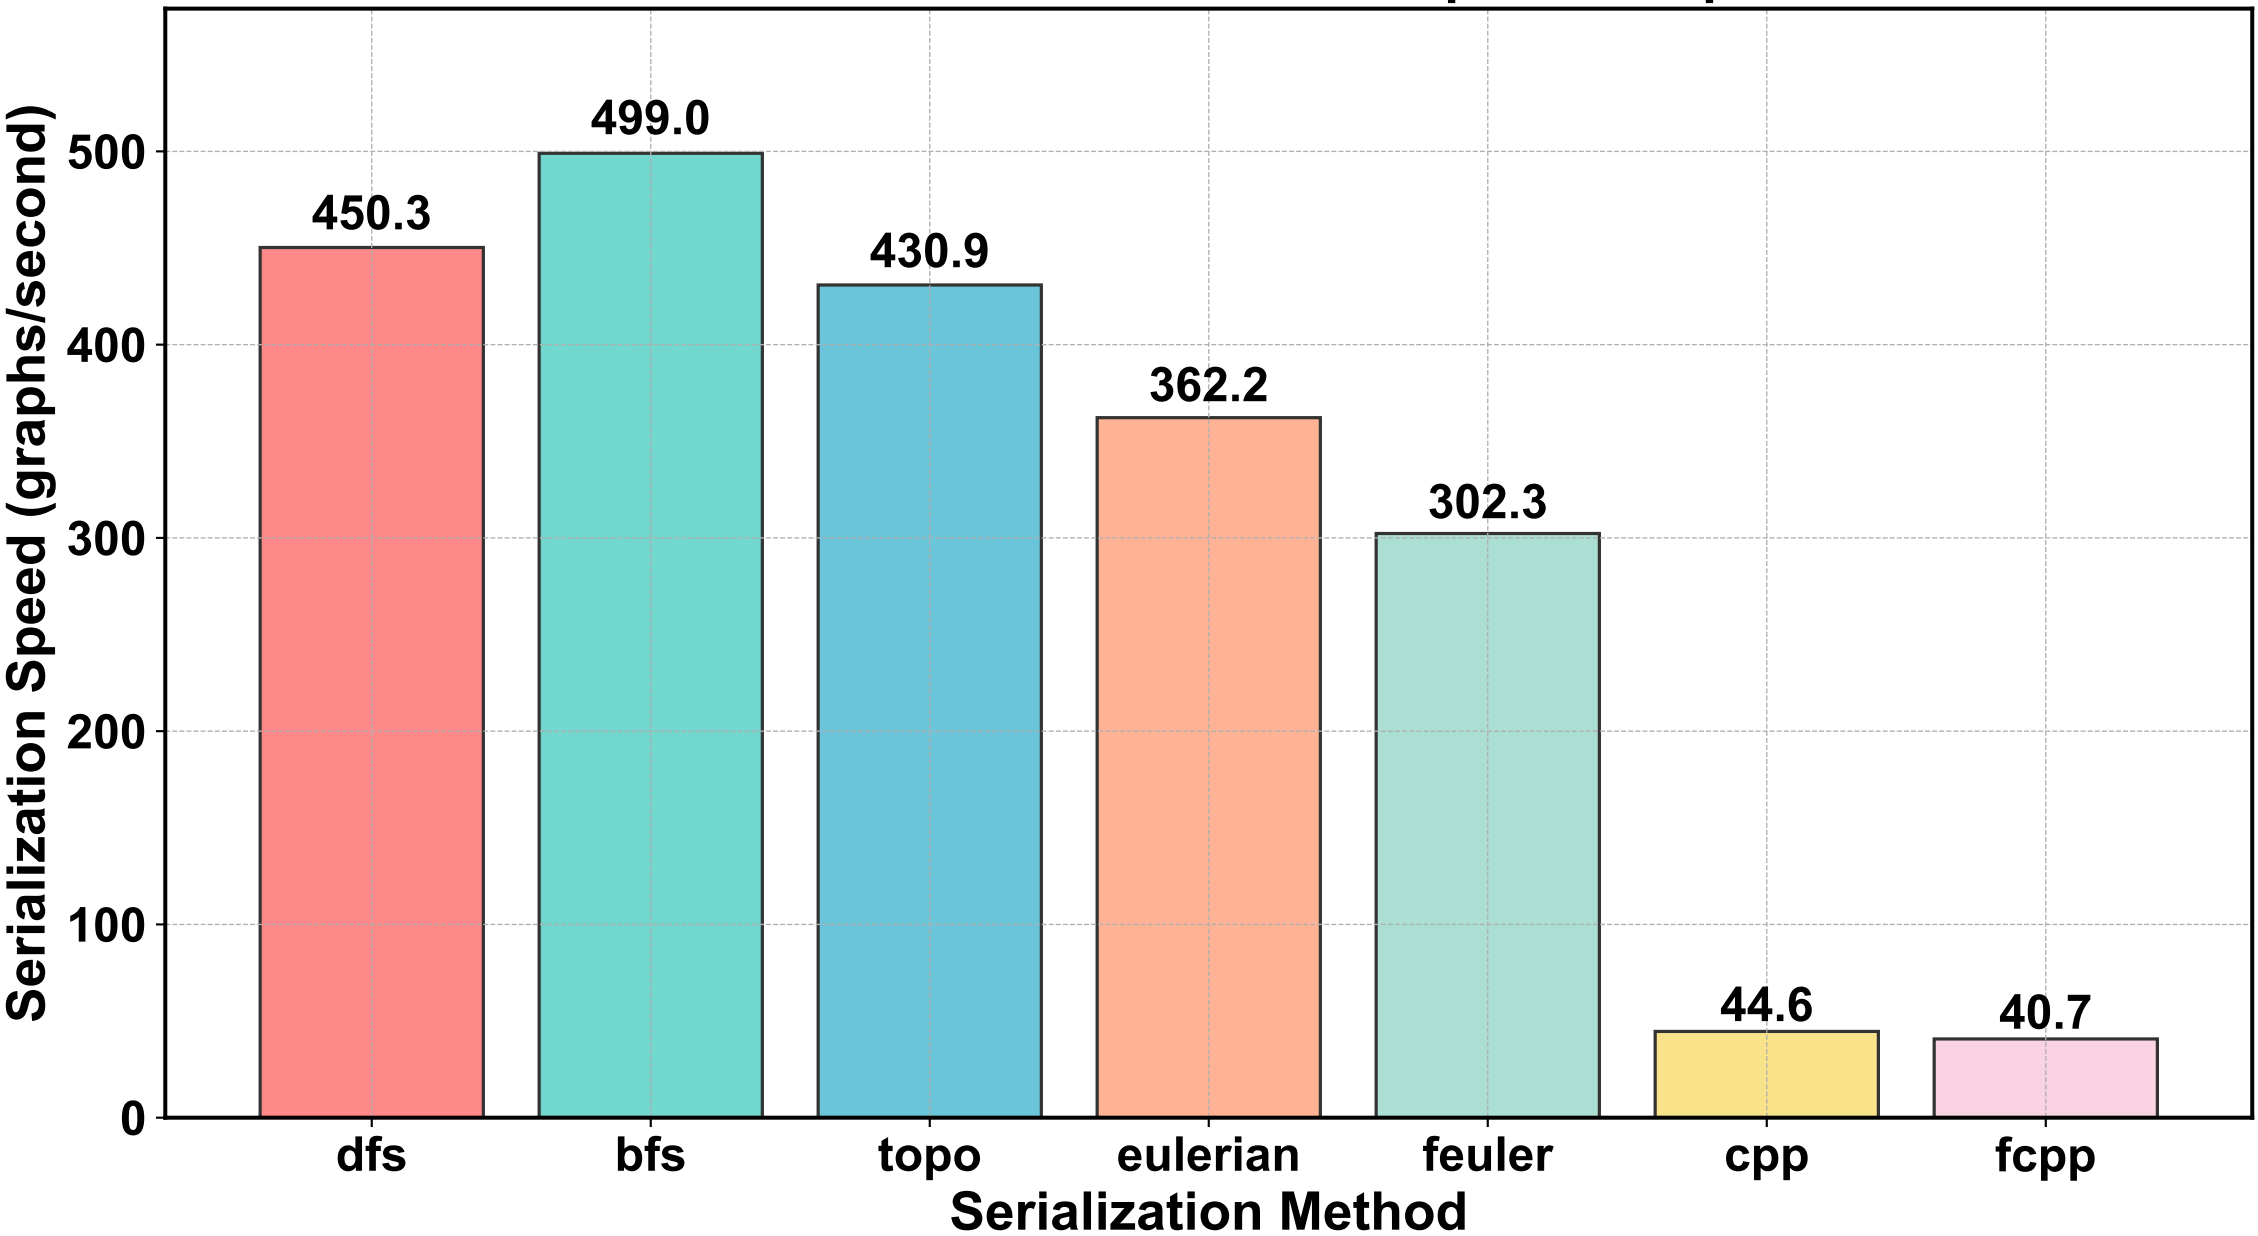

Supplement: supplementary_material [file SYNTHETIC_serialization_speed.pdf › submit_GraphTokenizer/submit_GraphTokenizer/final/exp1_speed/serialize_time/SYNTHETIC_serialization_speed.pdf]

**TWITTER Dataset - Serialization Speed Comparison**

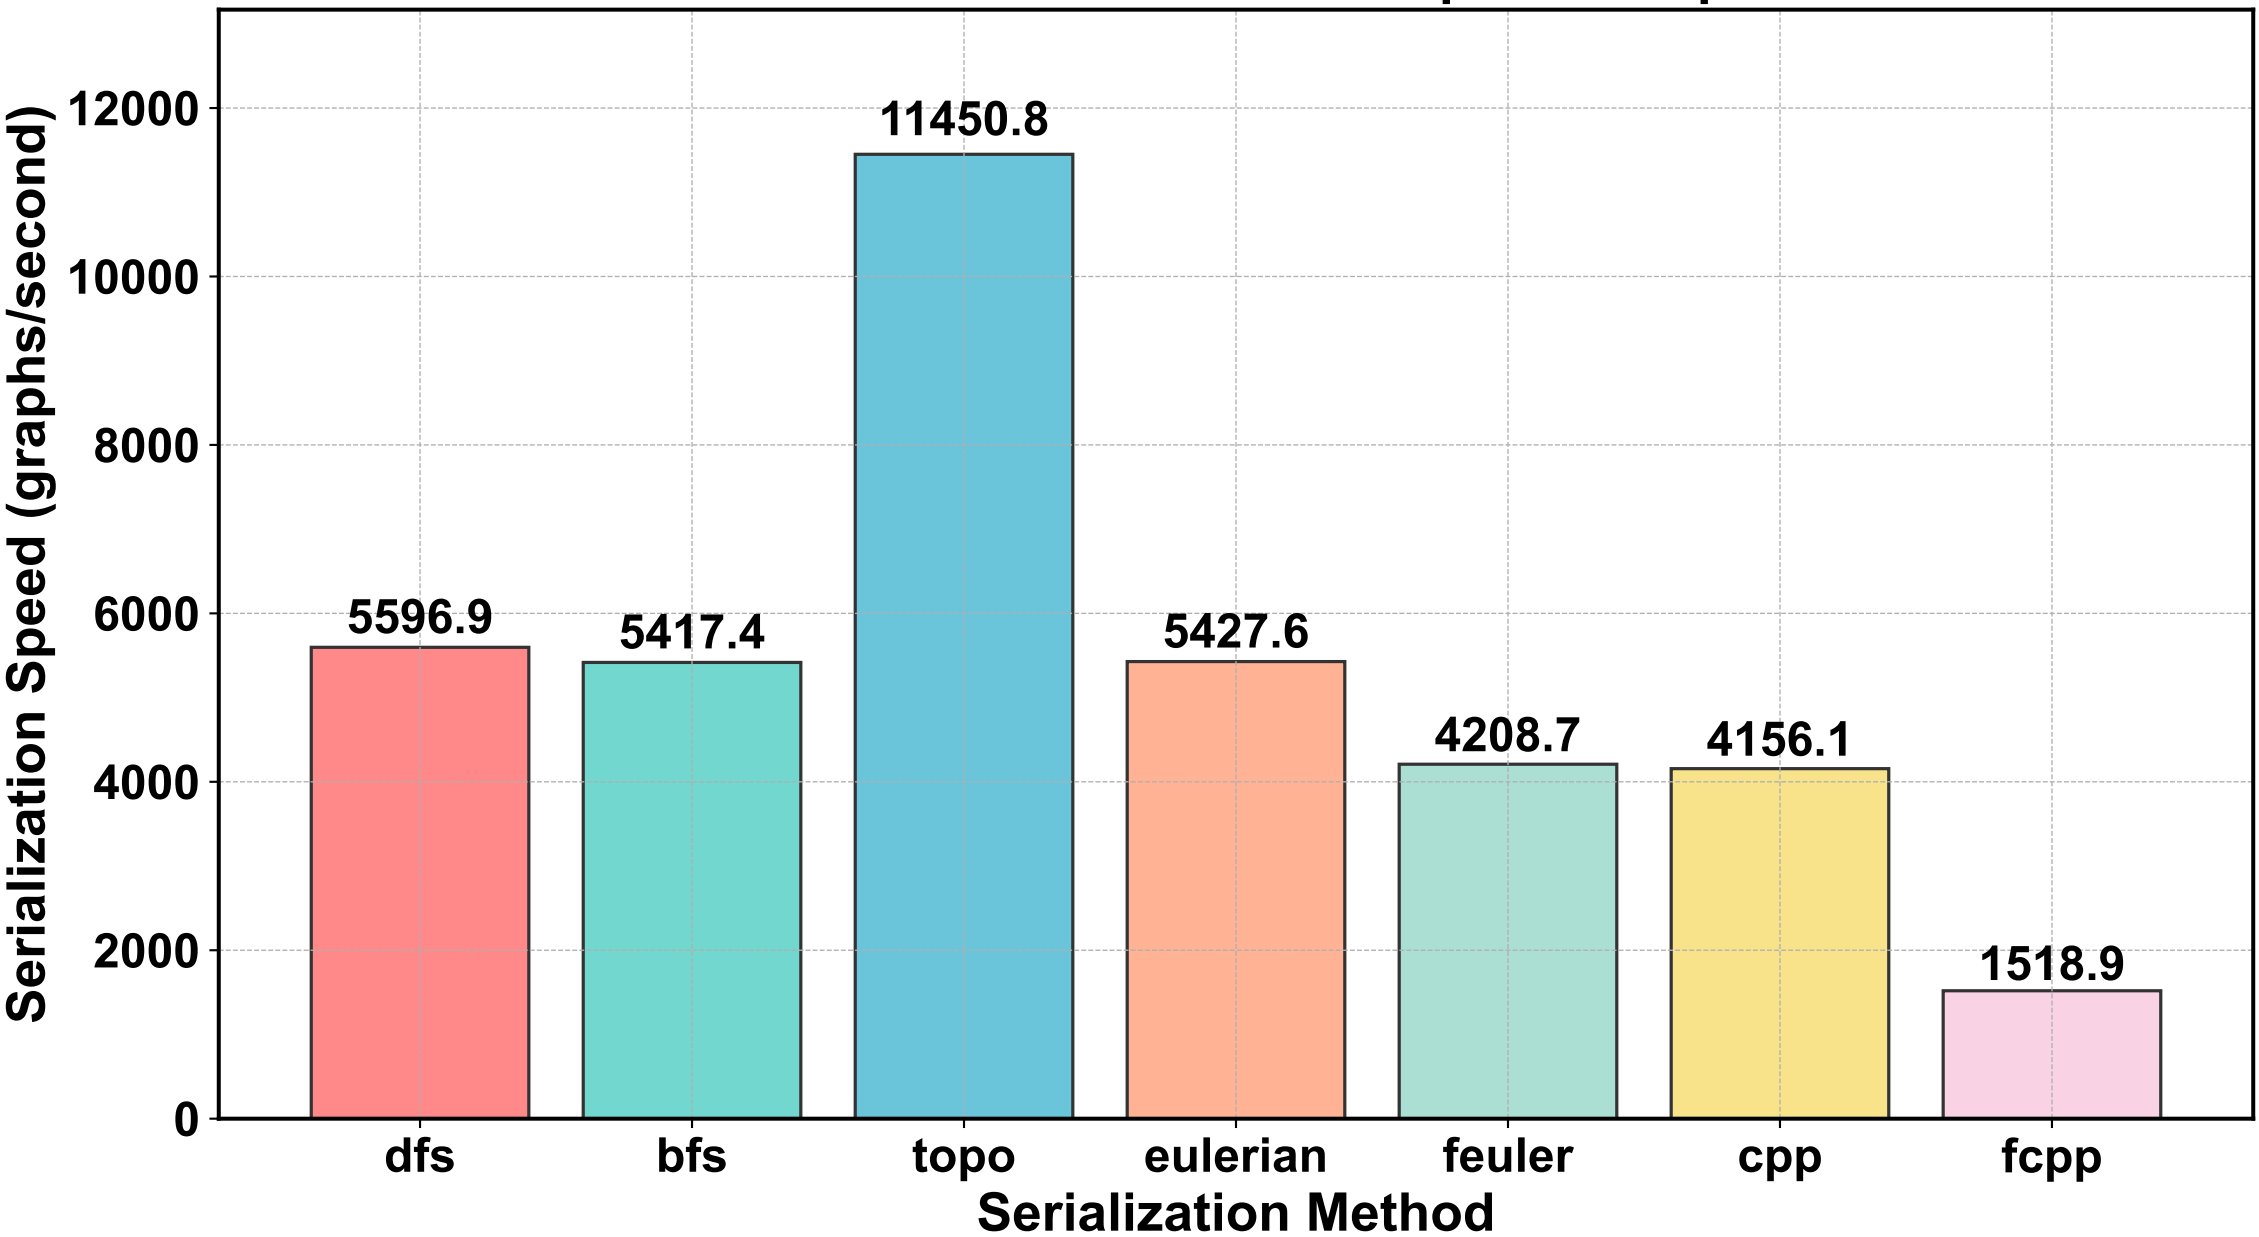

Supplement: supplementary_material [file TWITTER_serialization_speed.pdf › submit_GraphTokenizer/submit_GraphTokenizer/final/exp1_speed/serialize_time/TWITTER_serialization_speed.pdf]

# ZINC Dataset - Serialization Speed Comparison

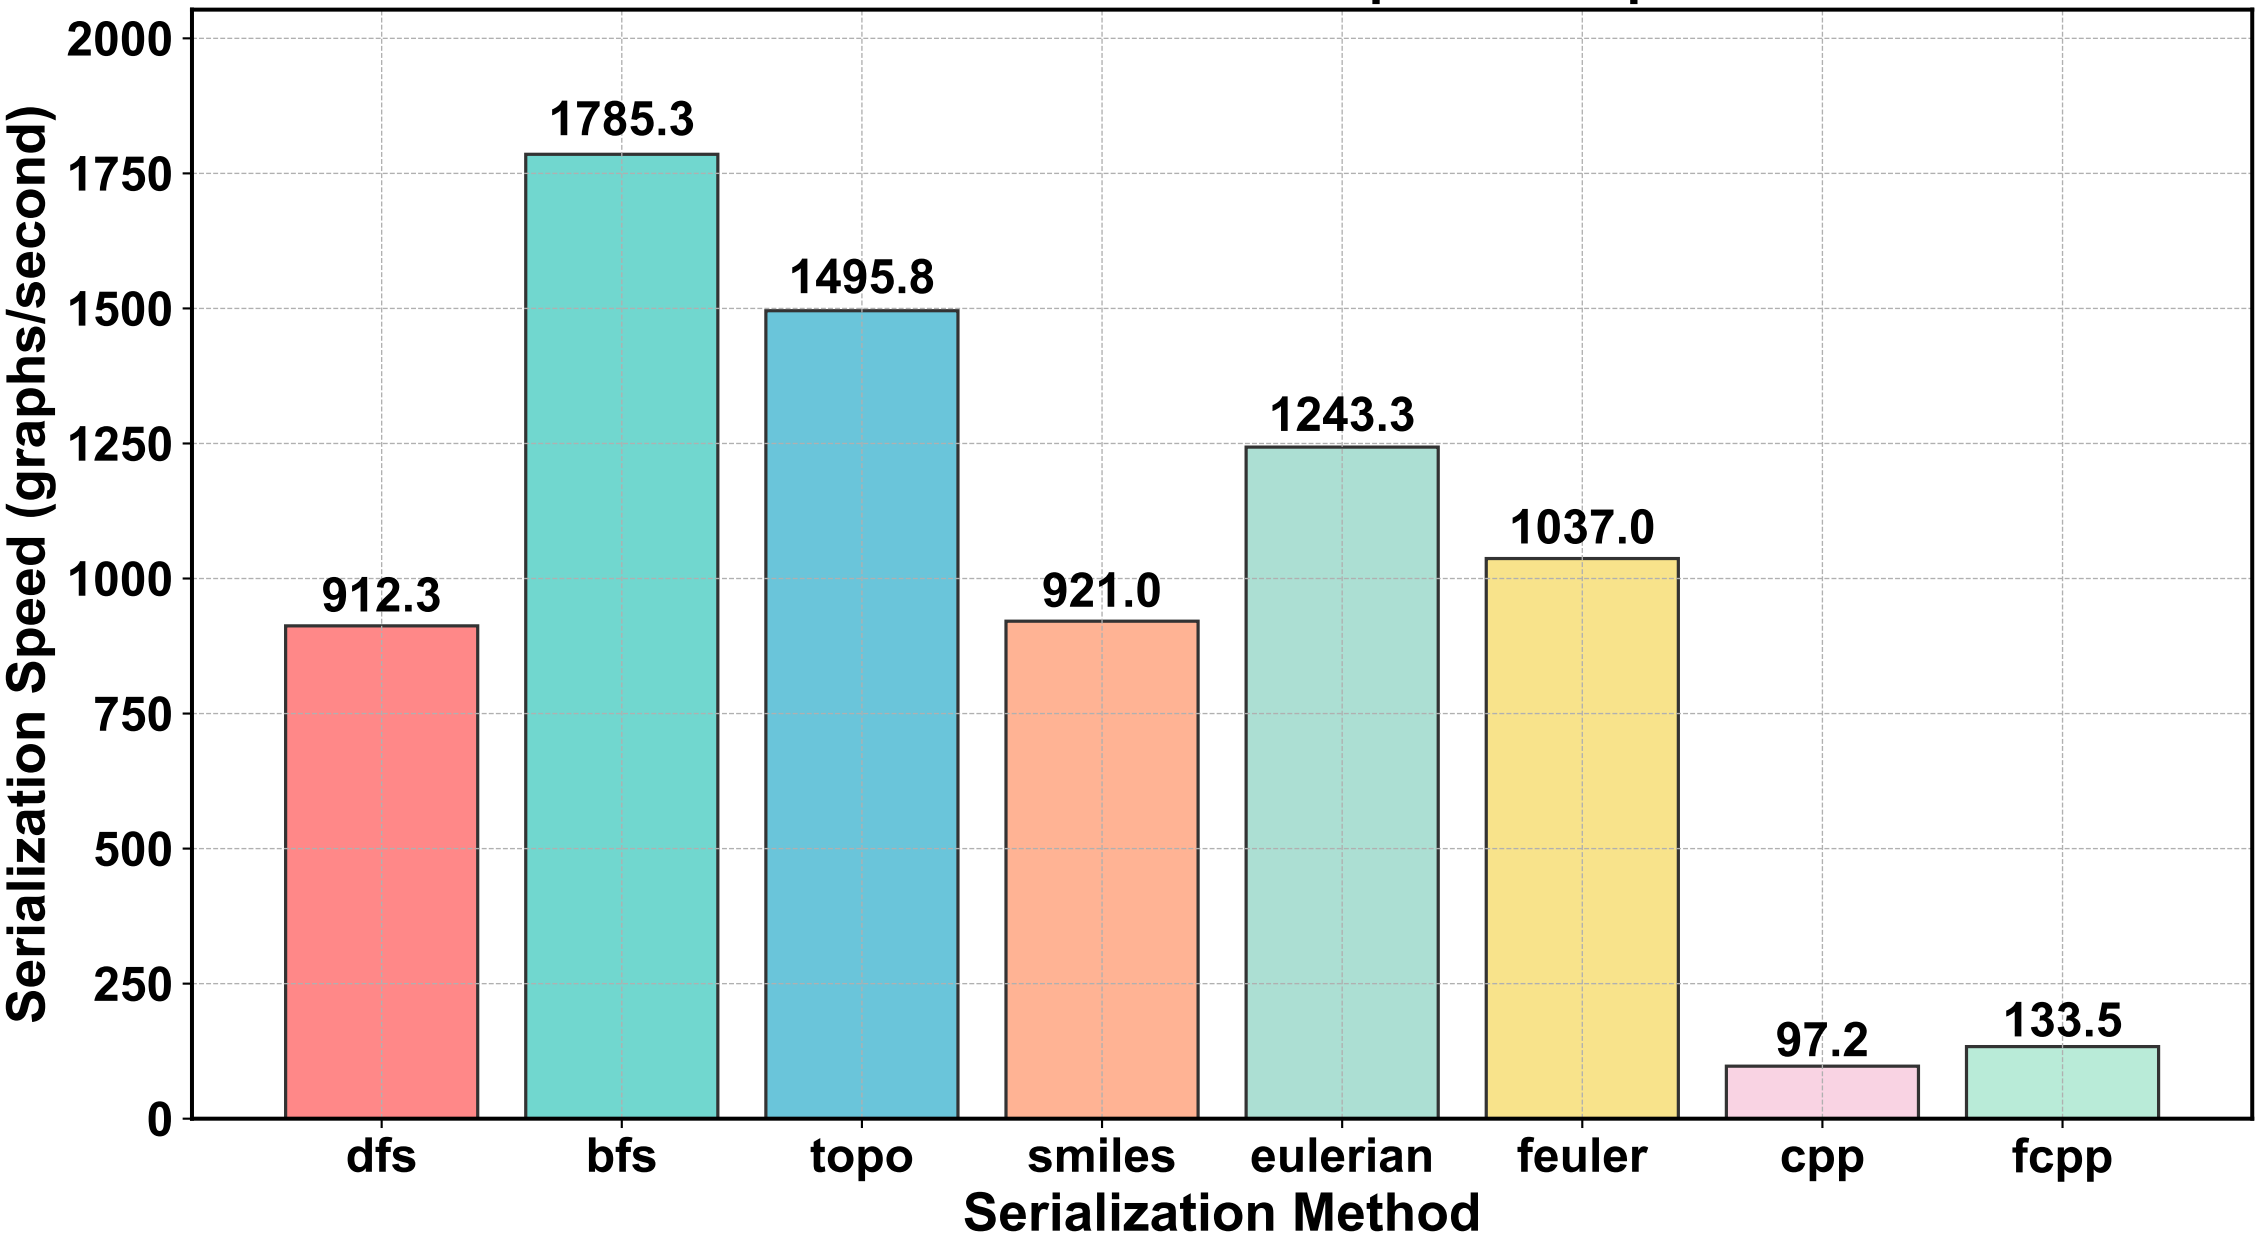

Supplement: supplementary_material [file ZINC_serialization_speed.pdf › submit_GraphTokenizer/submit_GraphTokenizer/final/exp1_speed/serialize_time/ZINC_serialization_speed.pdf]

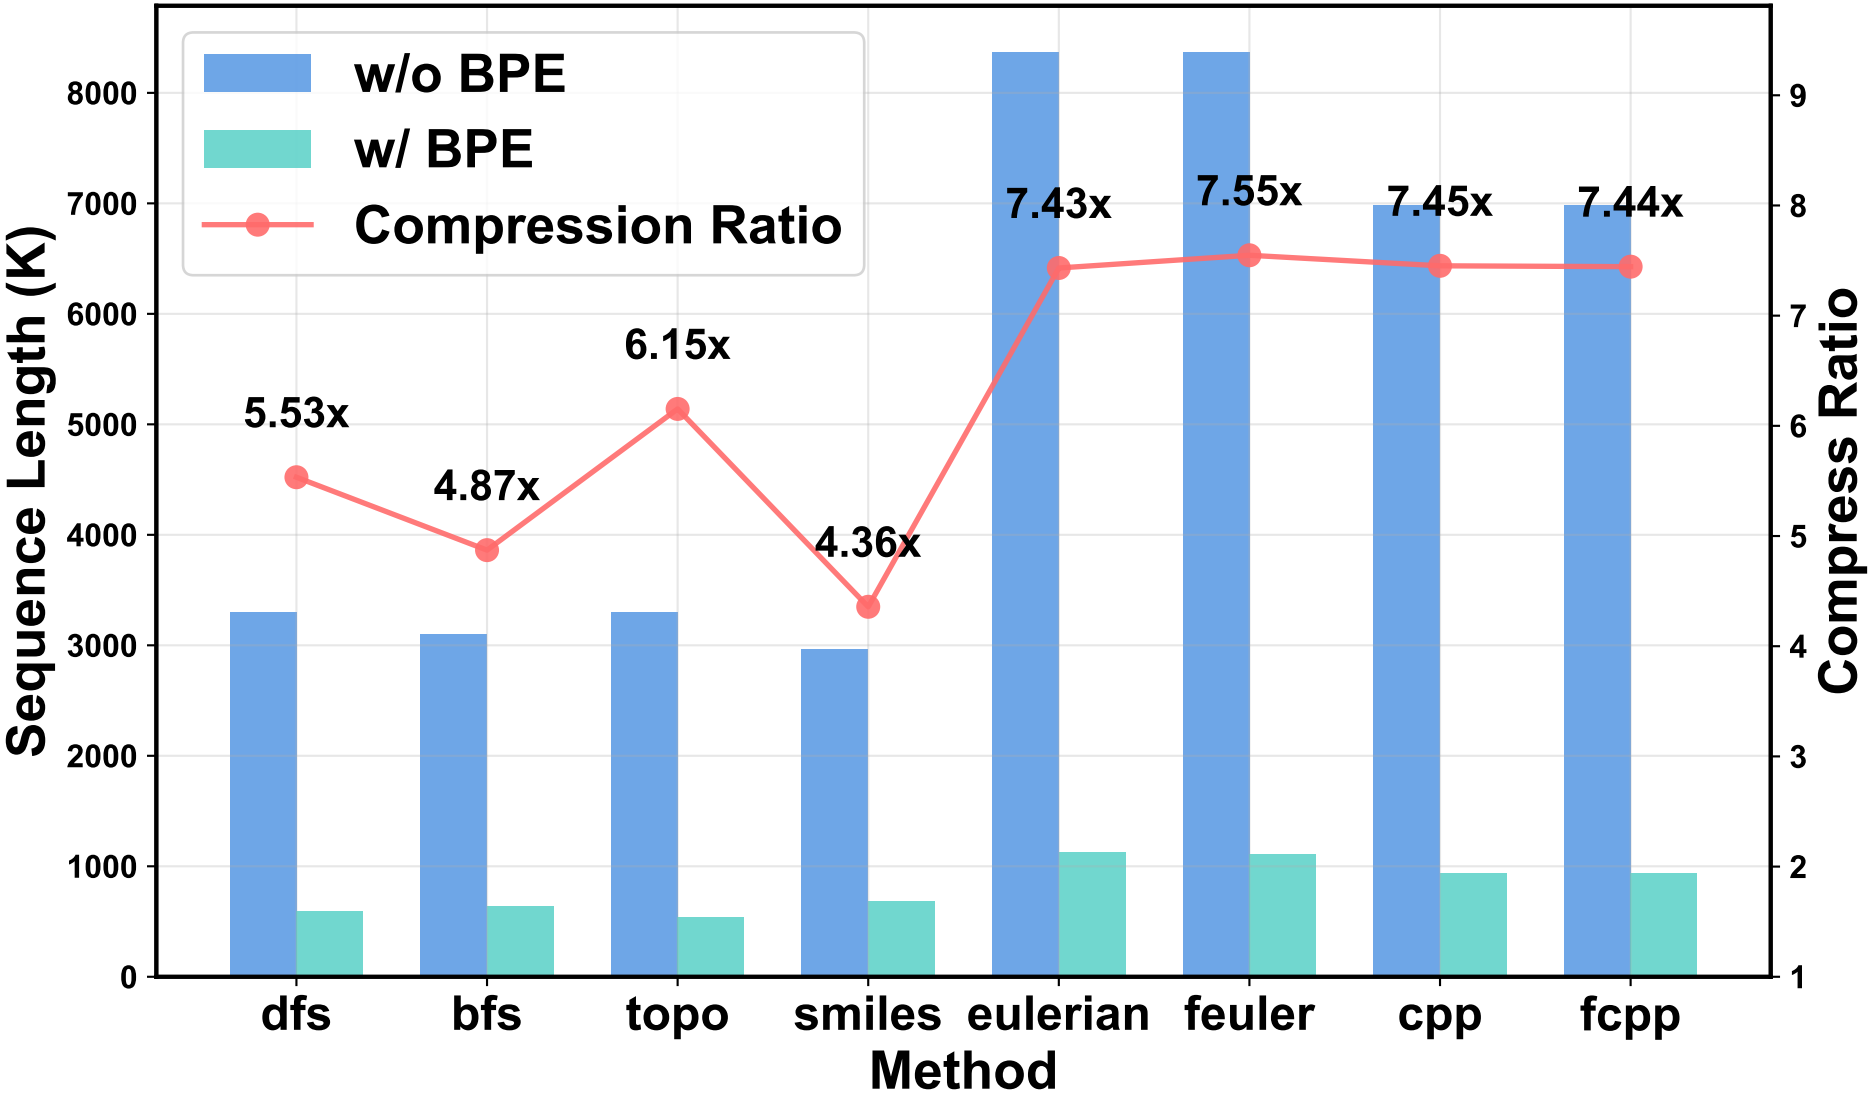

Supplement: supplementary_material [file aqsol_token_length_comparison.pdf › submit_GraphTokenizer/submit_GraphTokenizer/final/exp1_speed/token_length/aqsol_token_length_comparison.pdf]

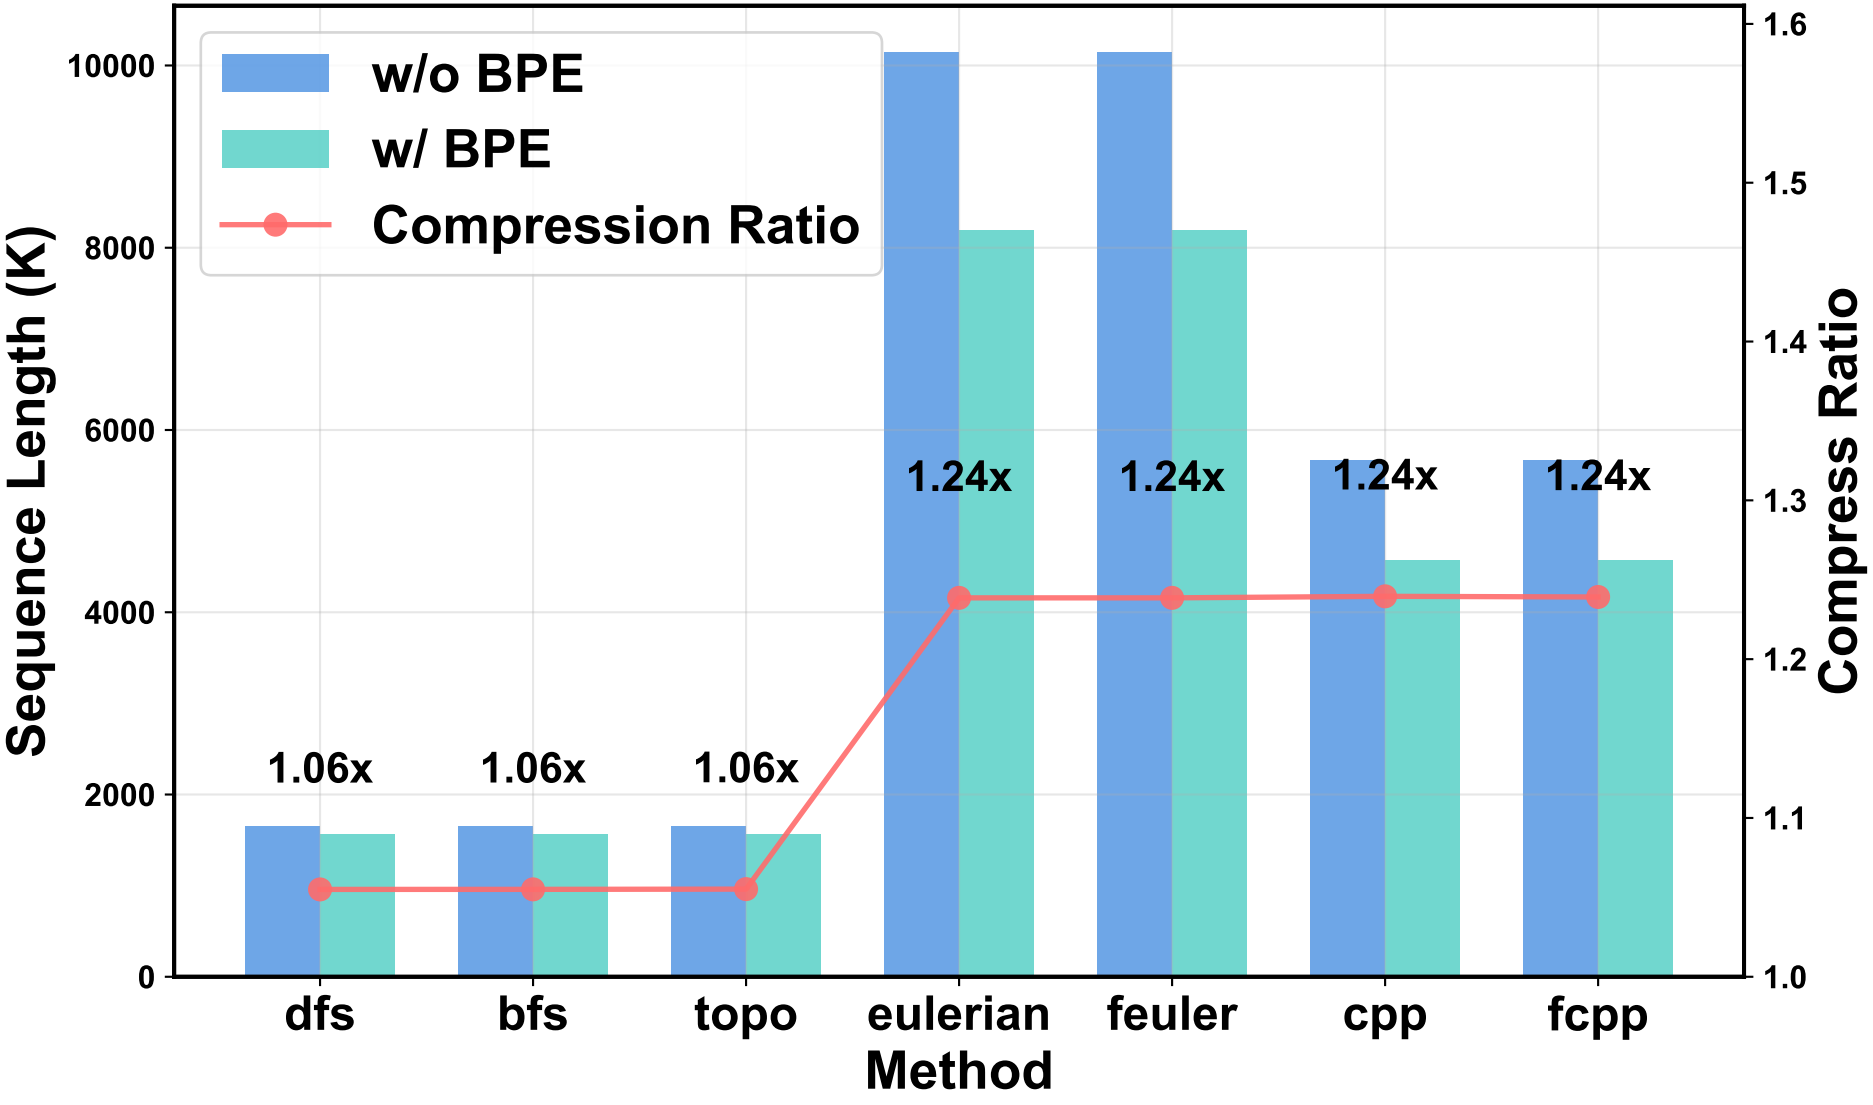

Supplement: supplementary_material [file coildel_token_length_comparison.pdf › submit_GraphTokenizer/submit_GraphTokenizer/final/exp1_speed/token_length/coildel_token_length_comparison.pdf]

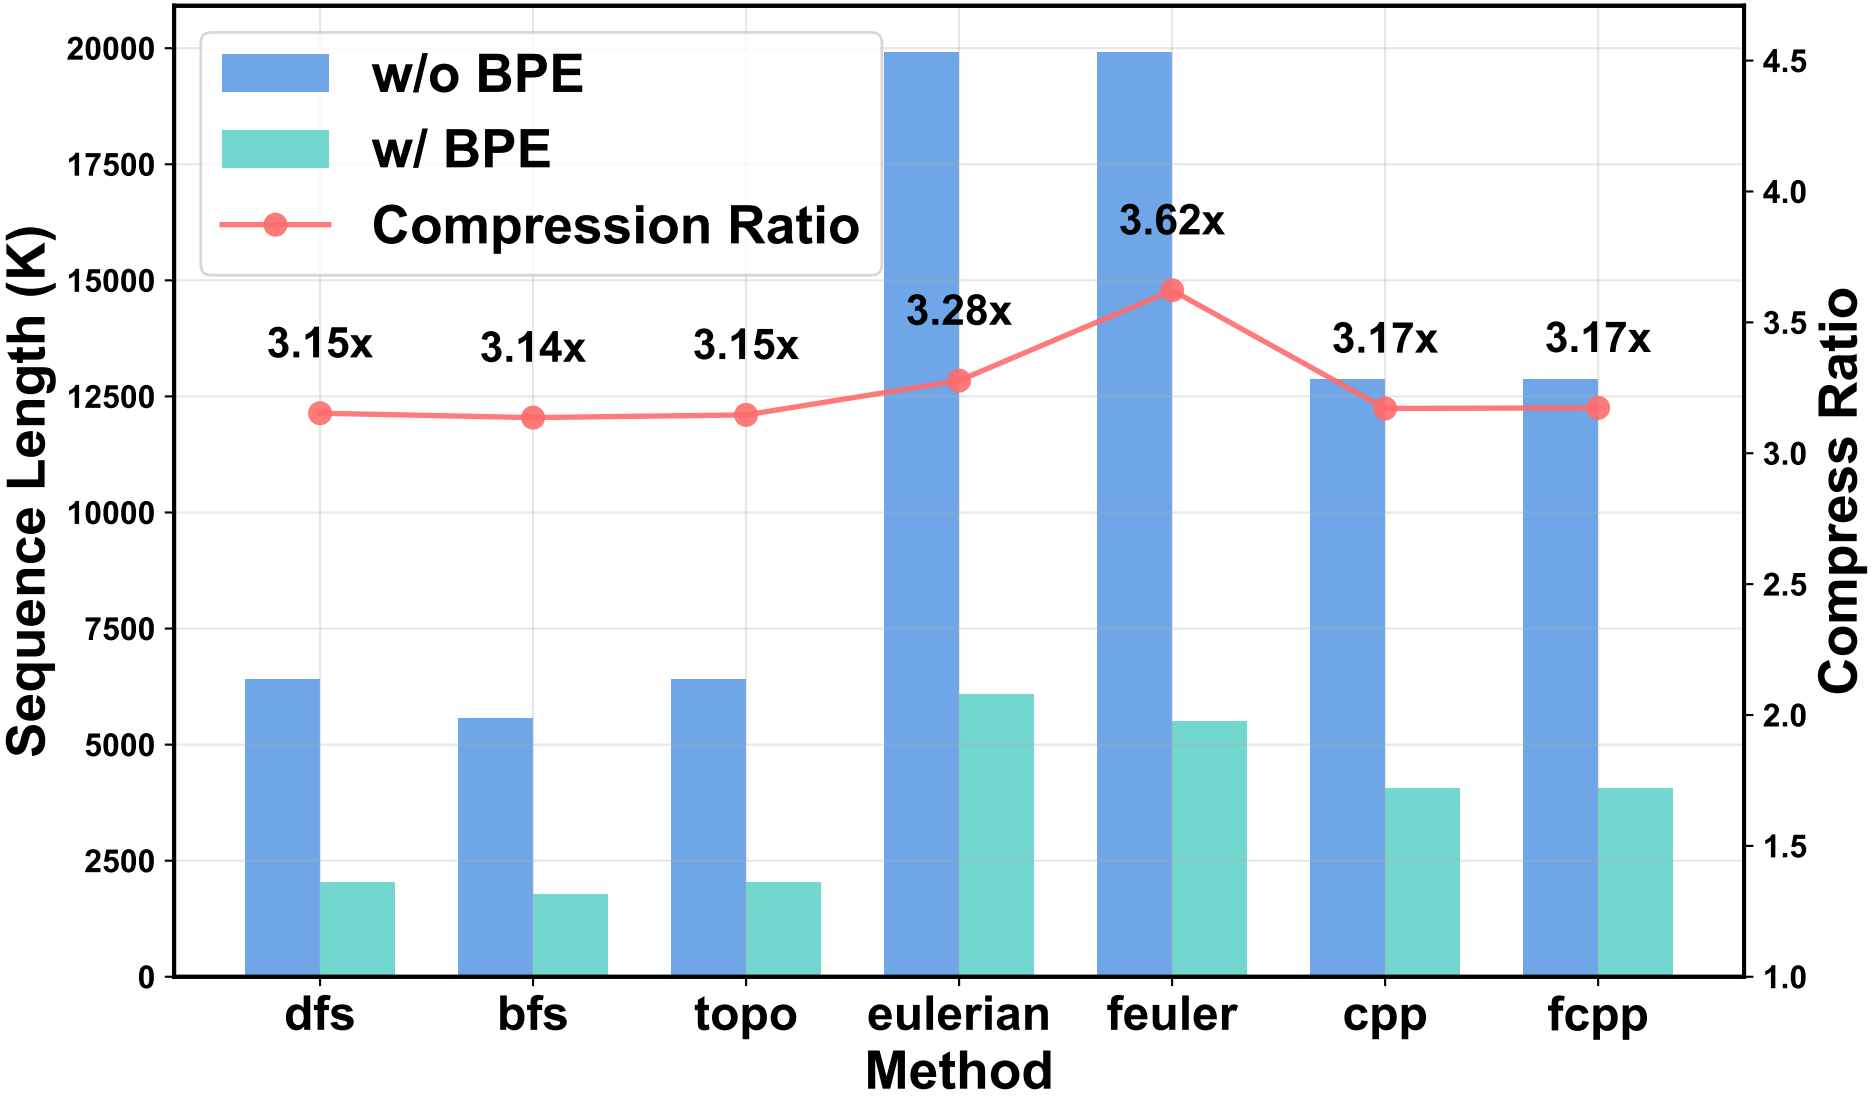

Supplement: supplementary_material [file colors3_token_length_comparison.pdf › submit_GraphTokenizer/submit_GraphTokenizer/final/exp1_speed/token_length/colors3_token_length_comparison.pdf]

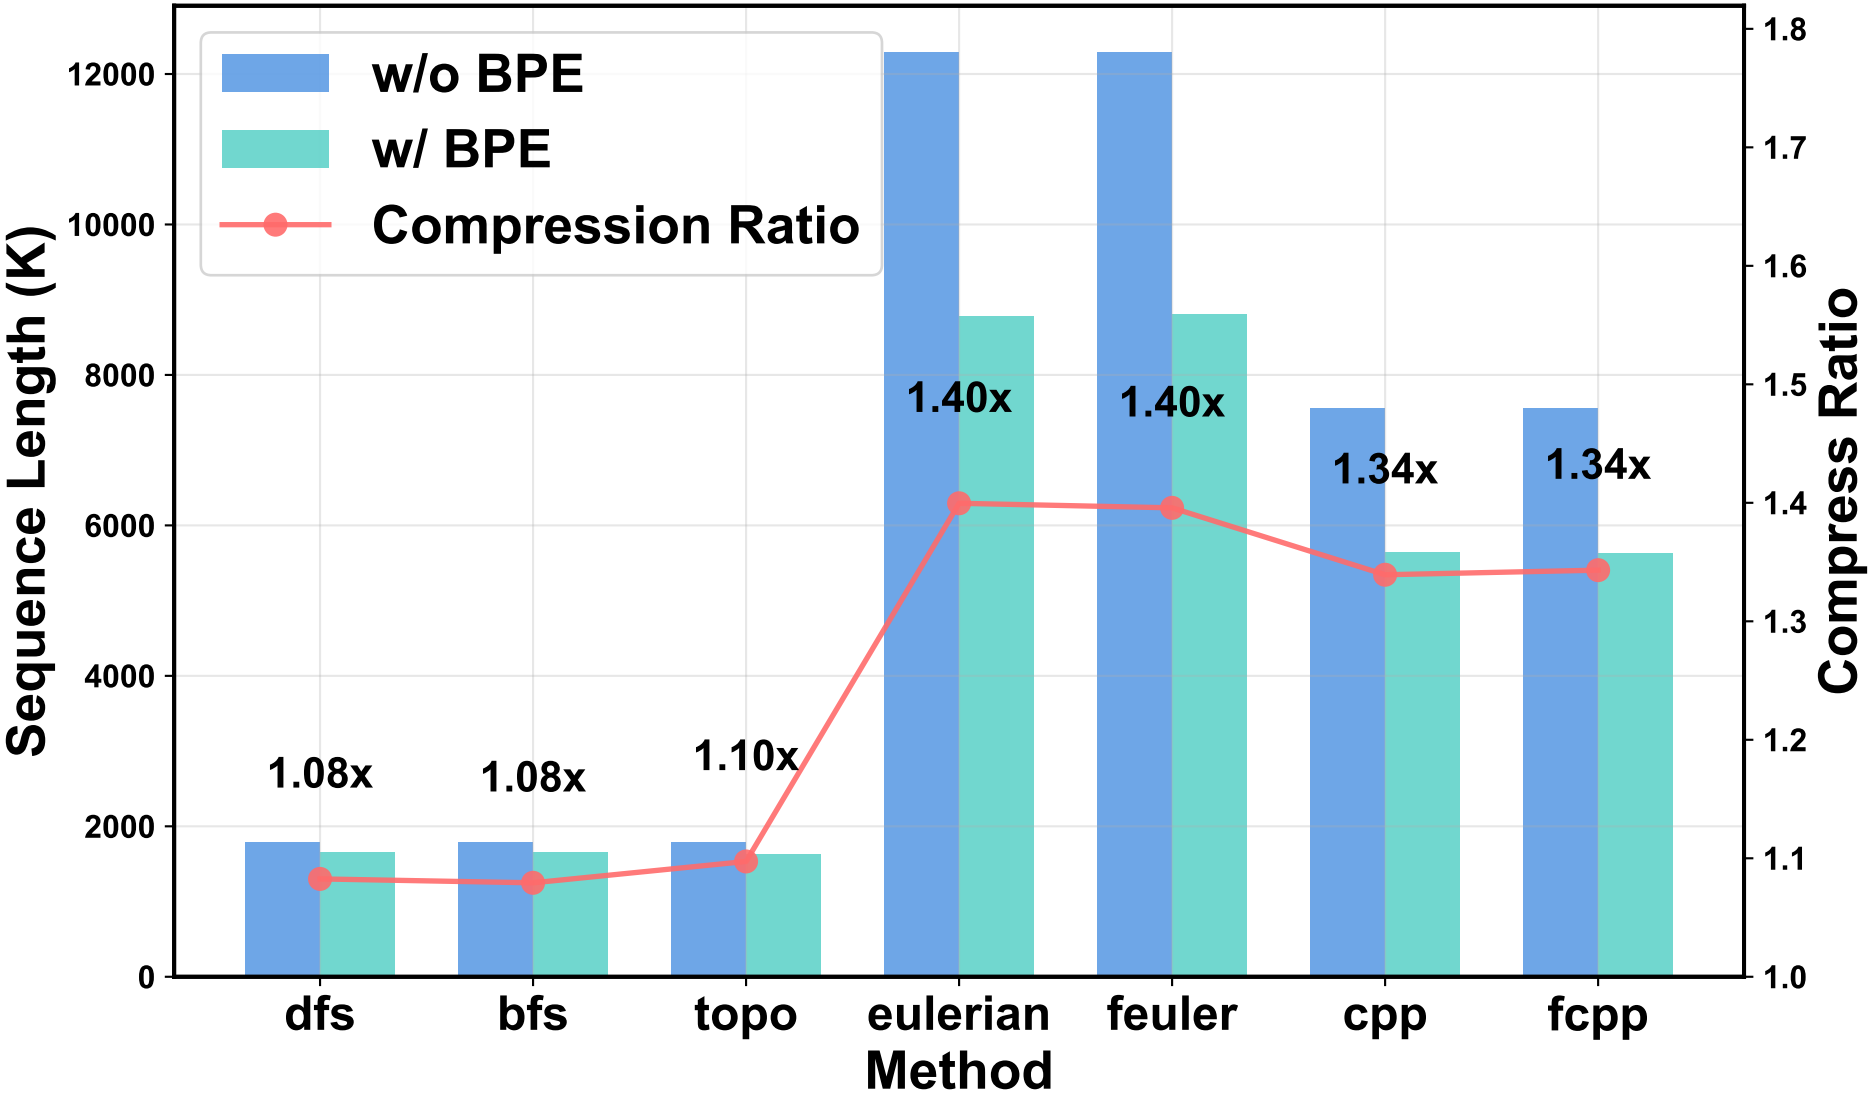

Supplement: supplementary_material [file dblp_token_length_comparison.pdf › submit_GraphTokenizer/submit_GraphTokenizer/final/exp1_speed/token_length/dblp_token_length_comparison.pdf]

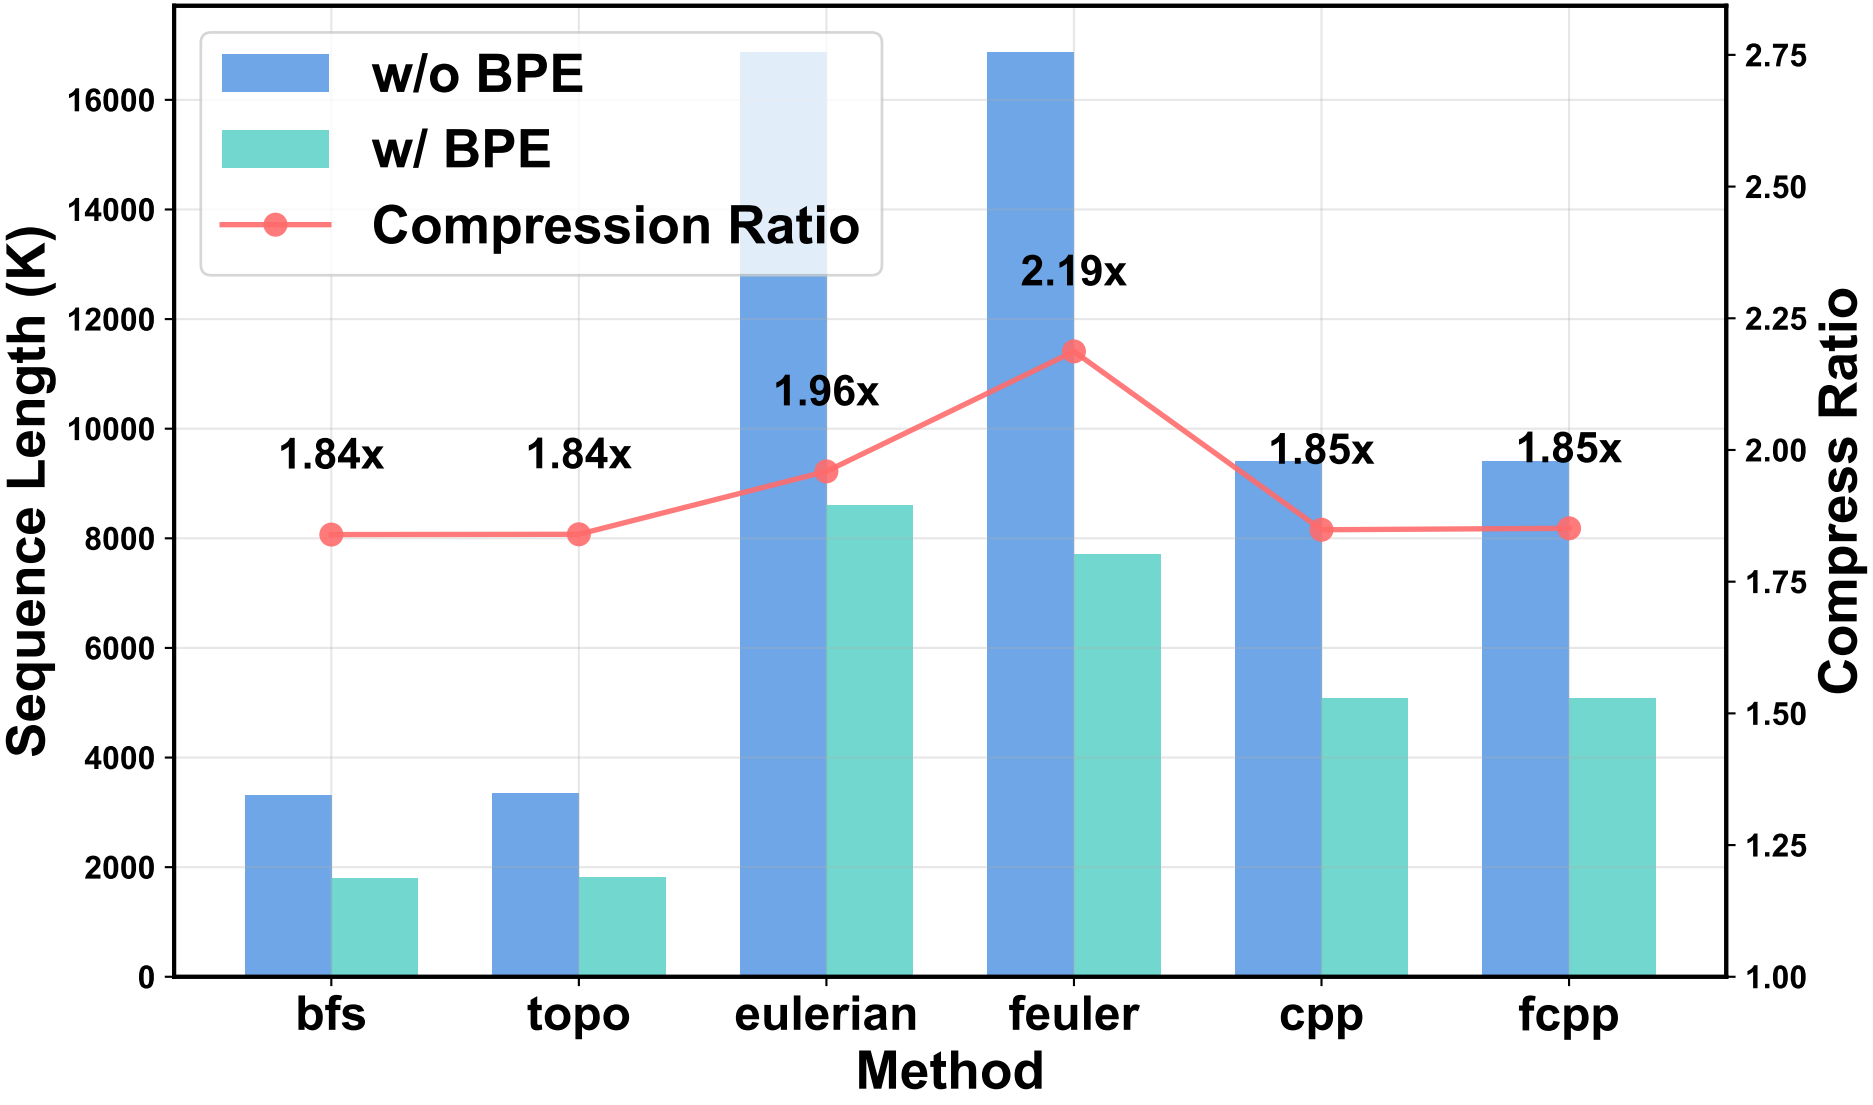

Supplement: supplementary_material [file dd_token_length_comparison.pdf › submit_GraphTokenizer/submit_GraphTokenizer/final/exp1_speed/token_length/dd_token_length_comparison.pdf]

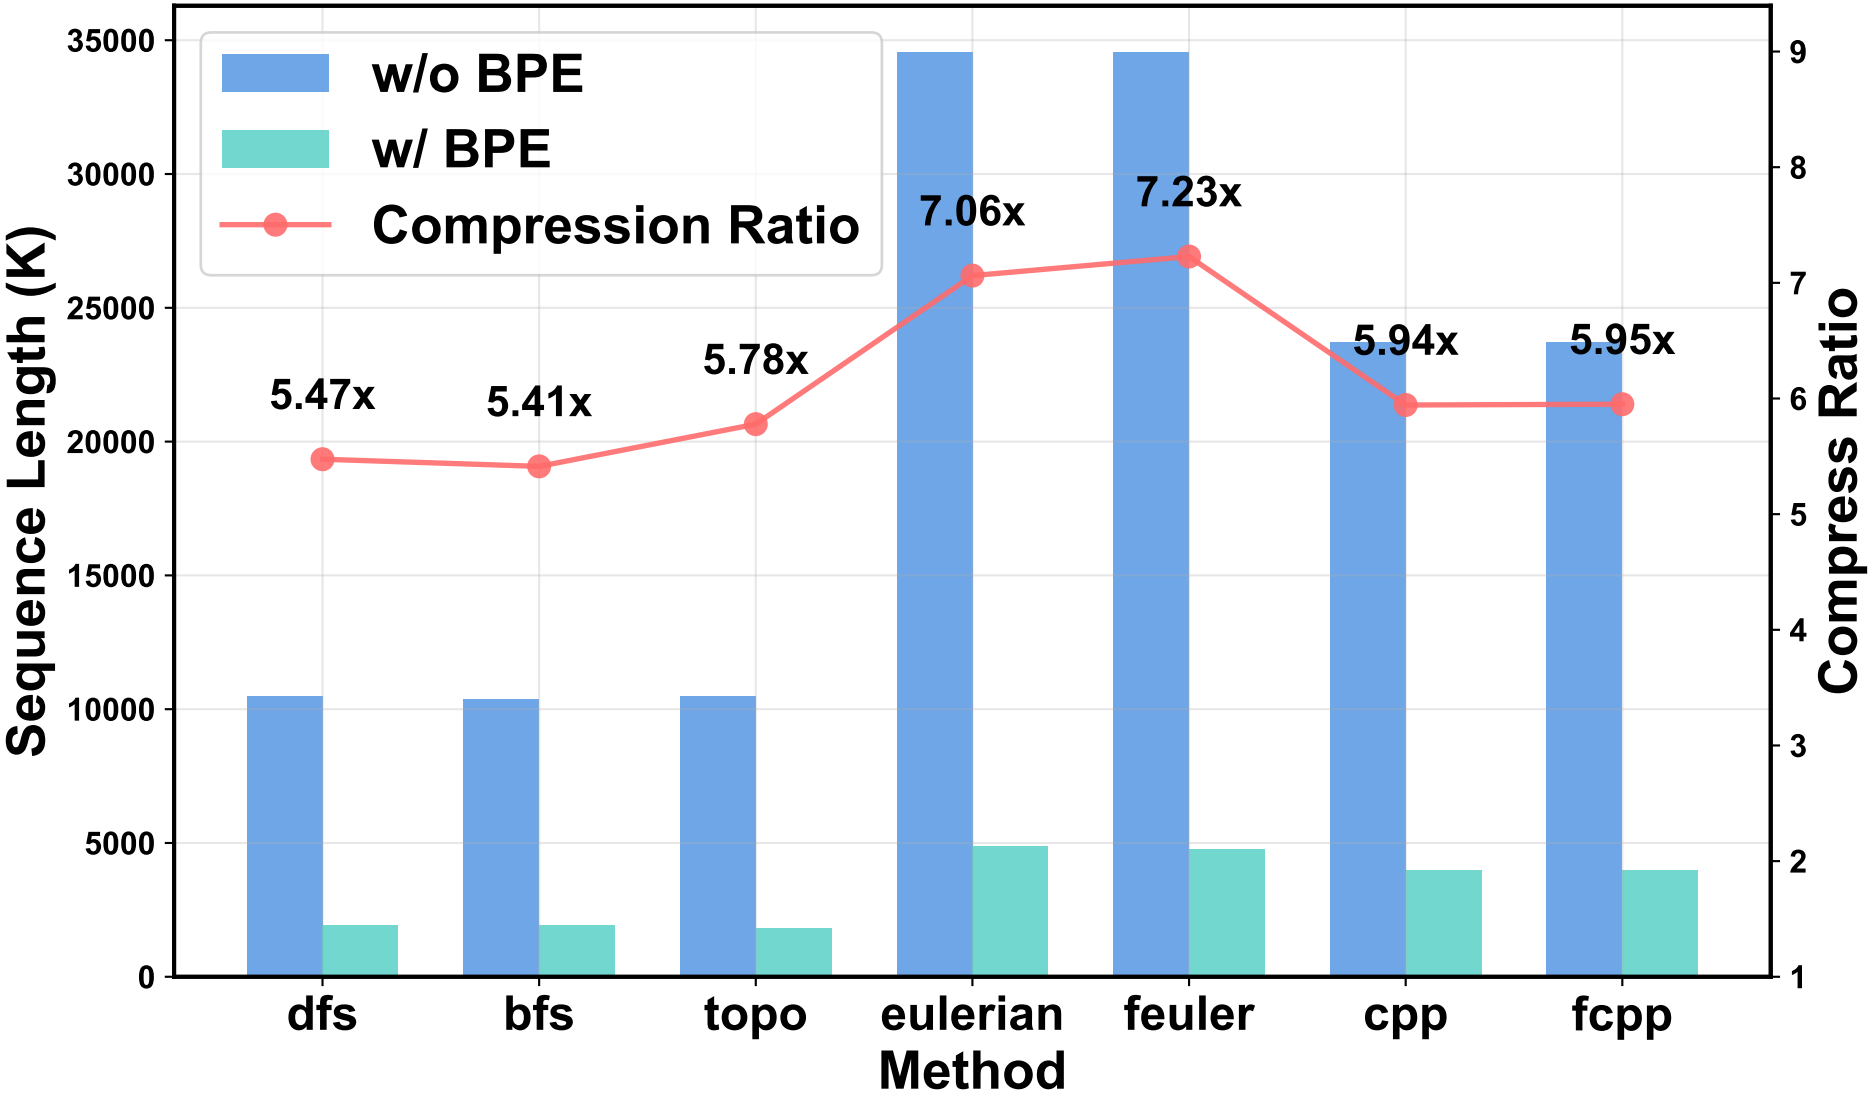

Supplement: supplementary_material [file molhiv_token_length_comparison.pdf › submit_GraphTokenizer/submit_GraphTokenizer/final/exp1_speed/token_length/molhiv_token_length_comparison.pdf]

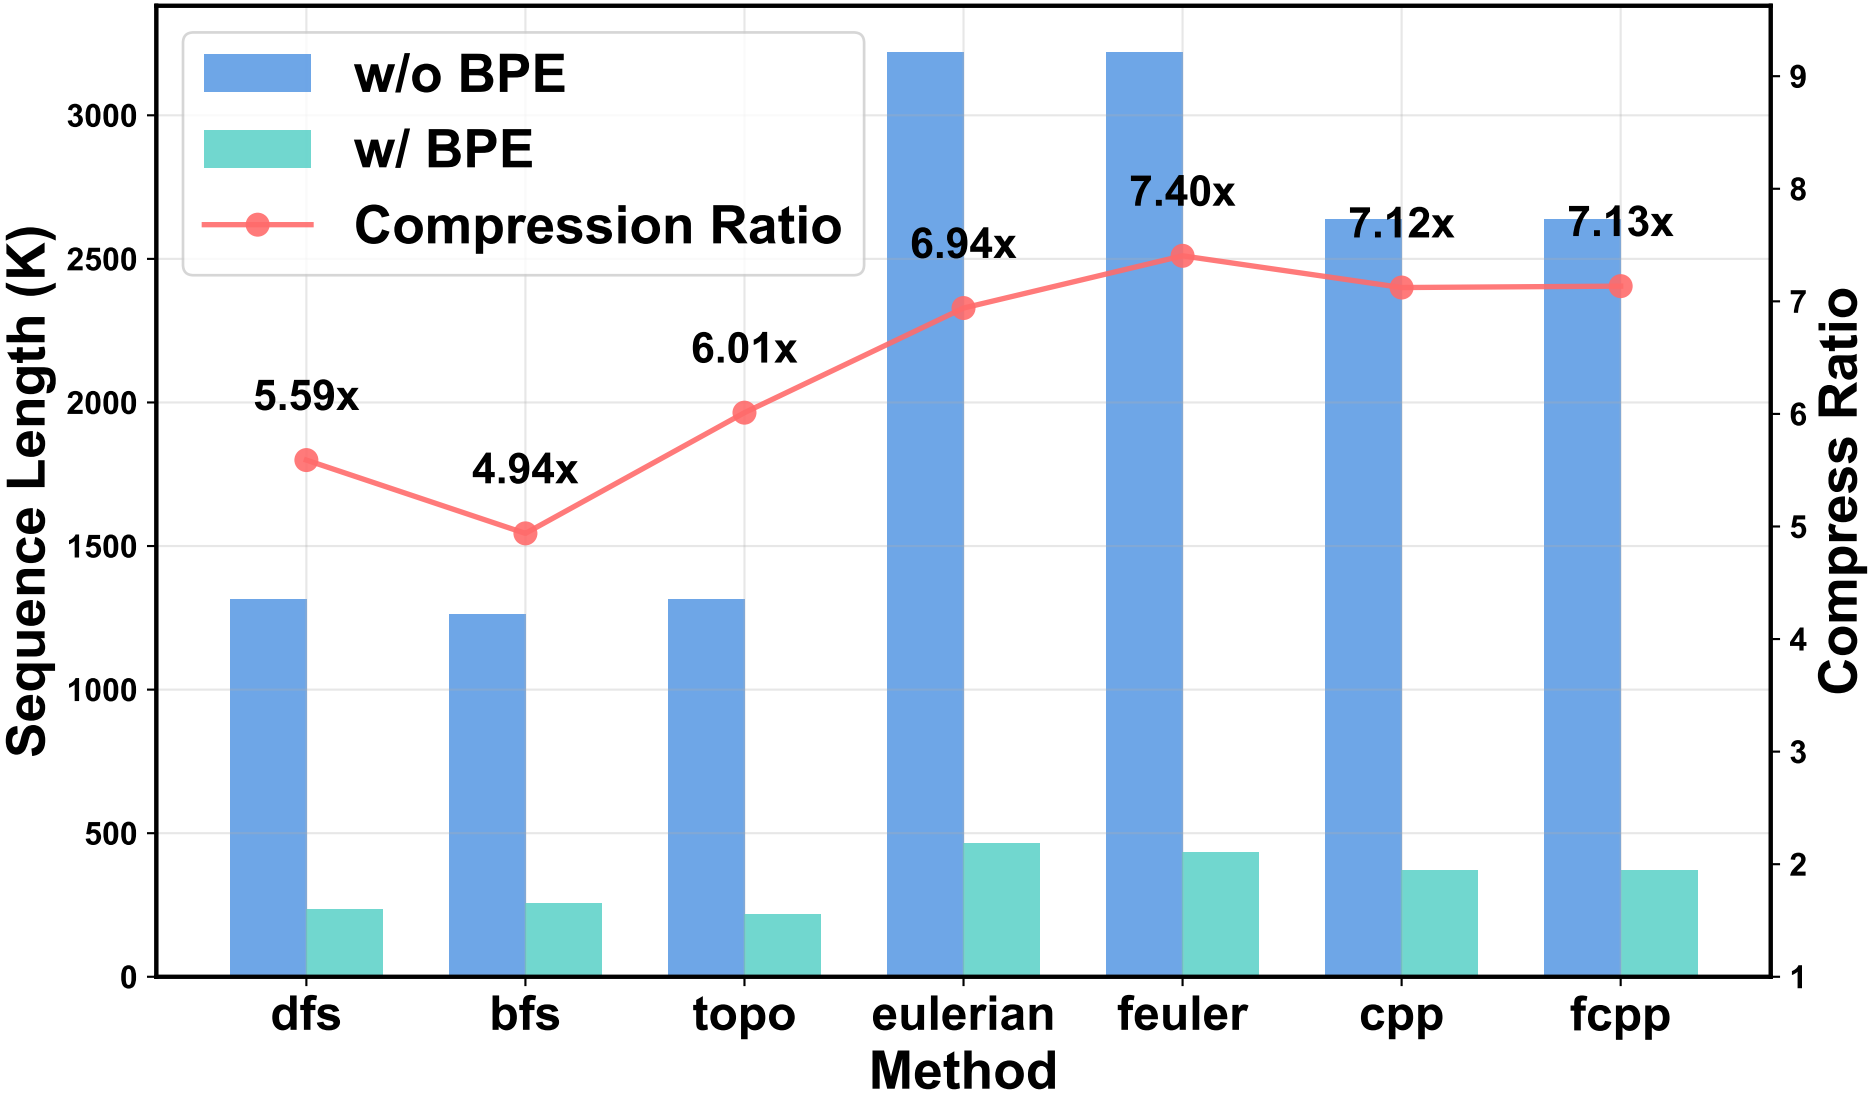

Supplement: supplementary_material [file mutagenicity_token_length_comparison.pdf › submit_GraphTokenizer/submit_GraphTokenizer/final/exp1_speed/token_length/mutagenicity_token_length_comparison.pdf]

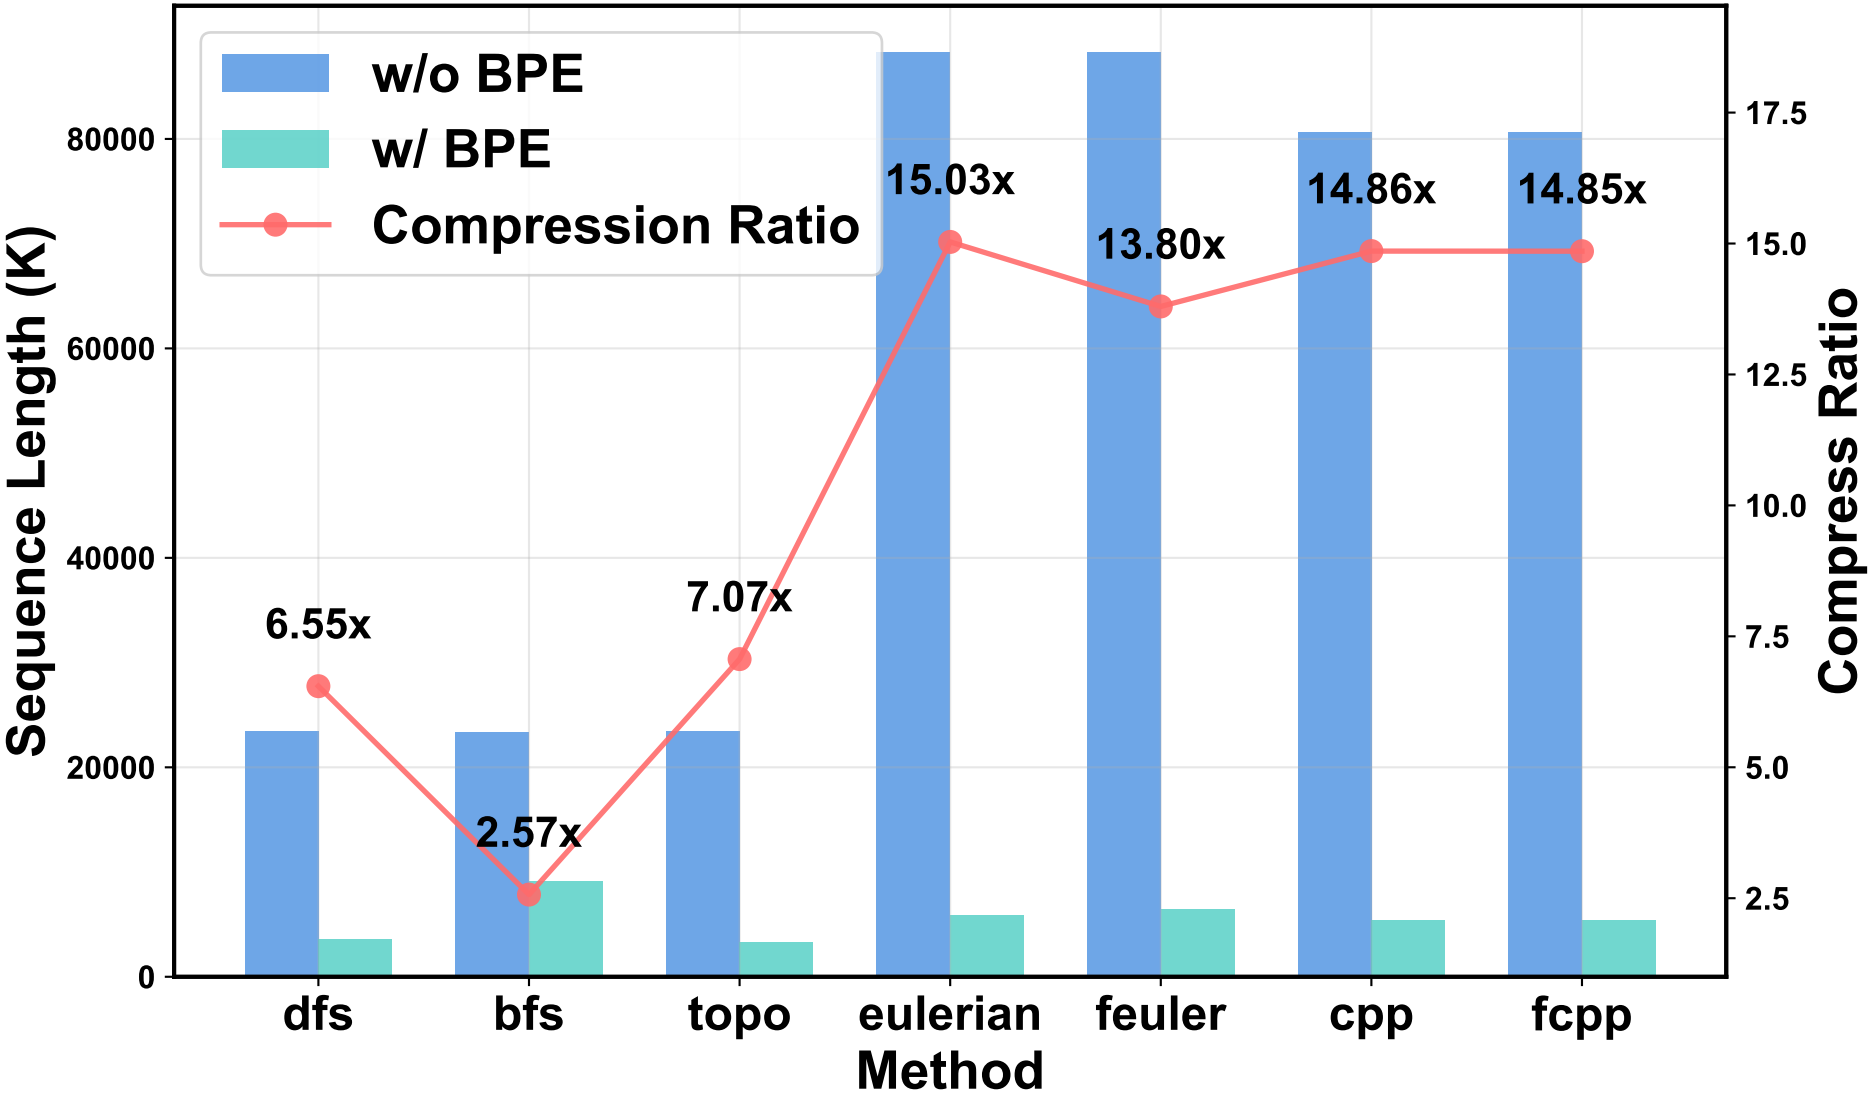

Supplement: supplementary_material [file peptides_func_mult10_token_length_comparison.pdf › submit_GraphTokenizer/submit_GraphTokenizer/final/exp1_speed/token_length/peptides_func_mult10_token_length_comparison.pdf]

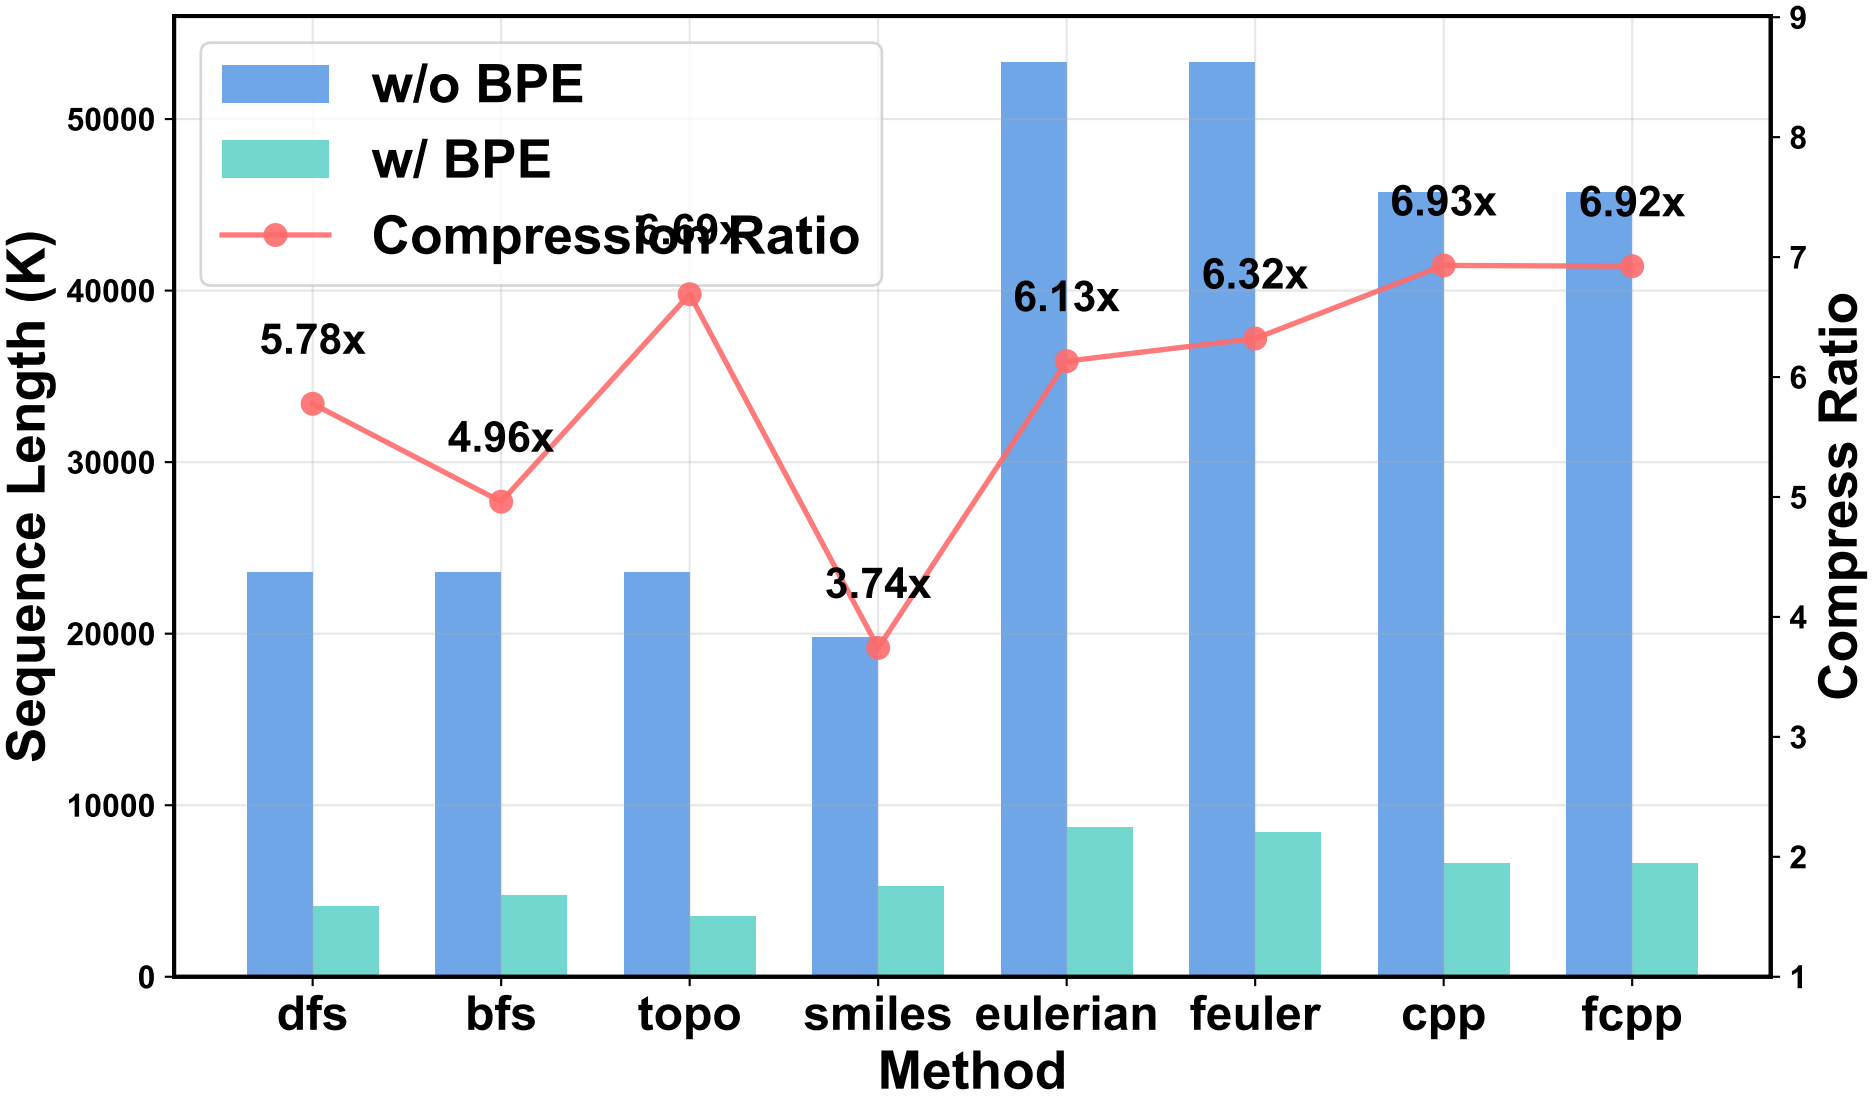

Supplement: supplementary_material [file qm9_token_length_comparison.pdf › submit_GraphTokenizer/submit_GraphTokenizer/final/exp1_speed/token_length/qm9_token_length_comparison.pdf]

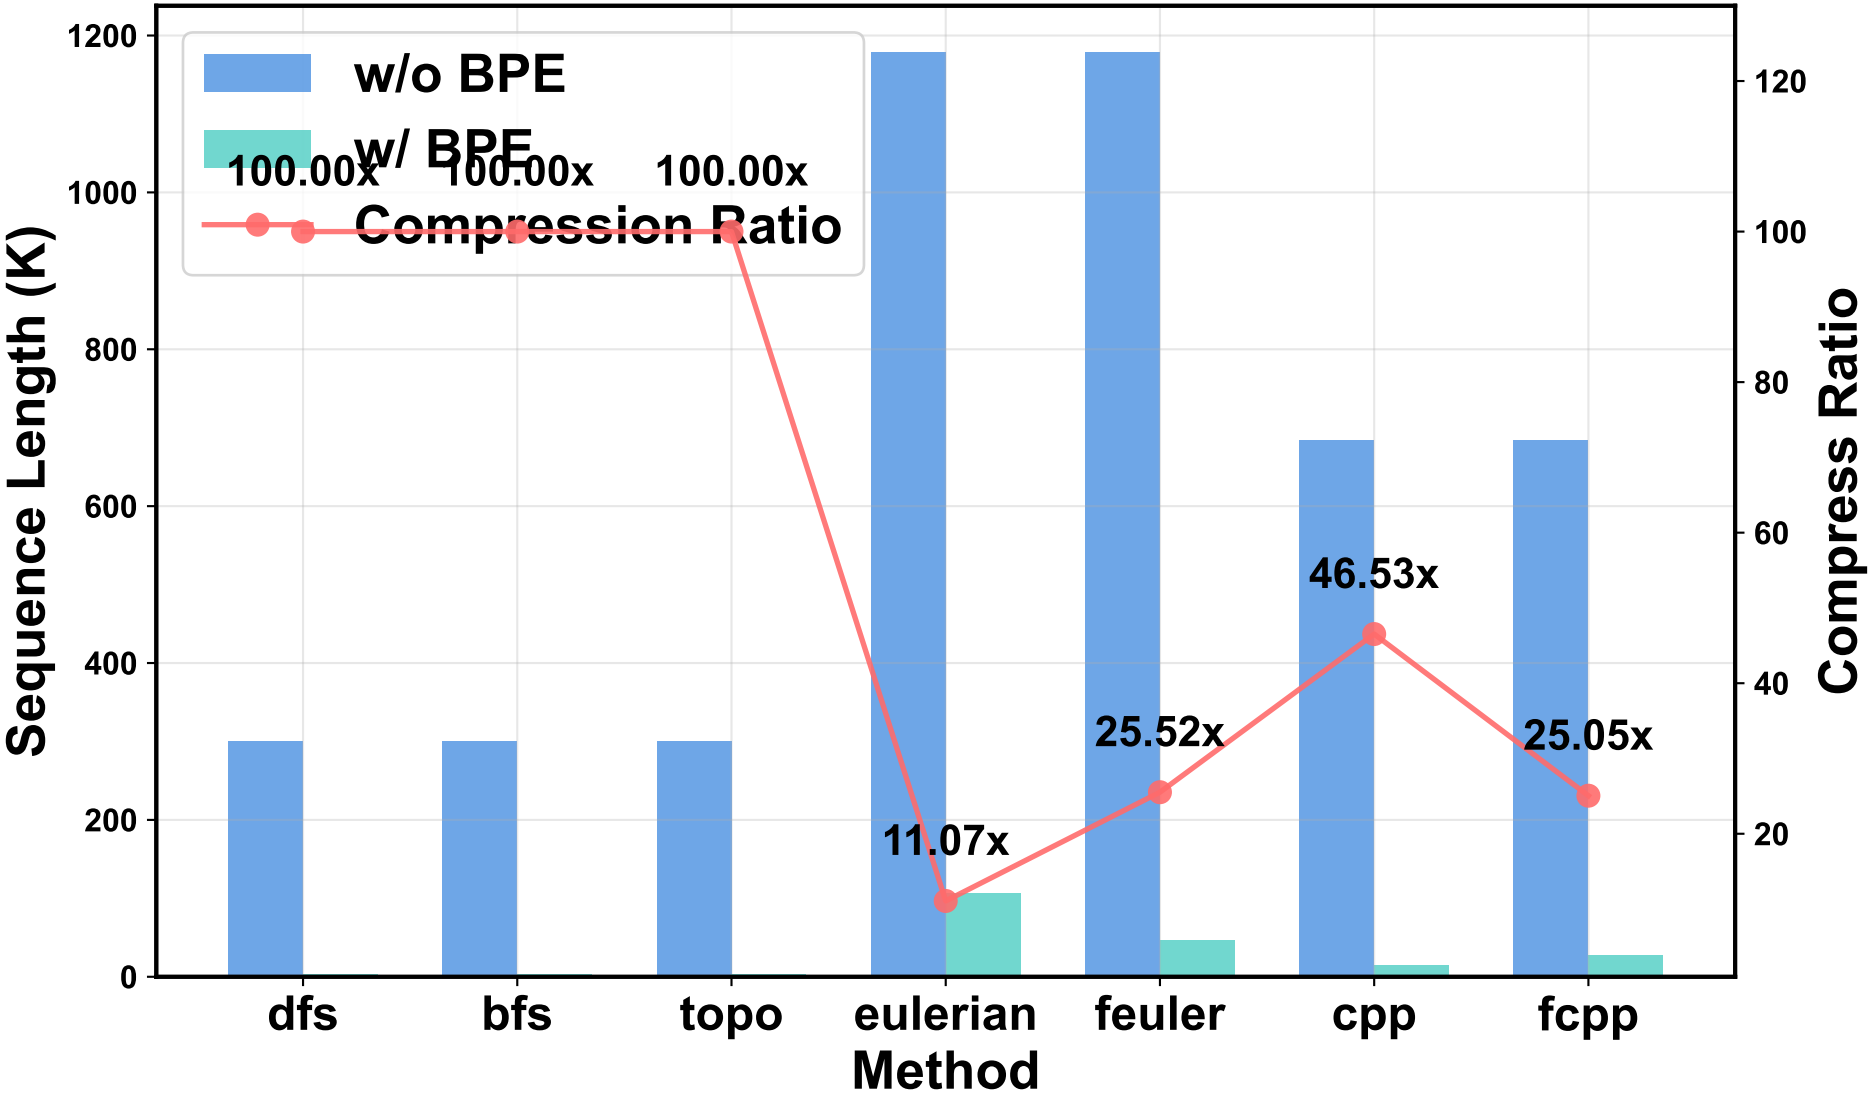

Supplement: supplementary_material [file synthetic_token_length_comparison.pdf › submit_GraphTokenizer/submit_GraphTokenizer/final/exp1_speed/token_length/synthetic_token_length_comparison.pdf]

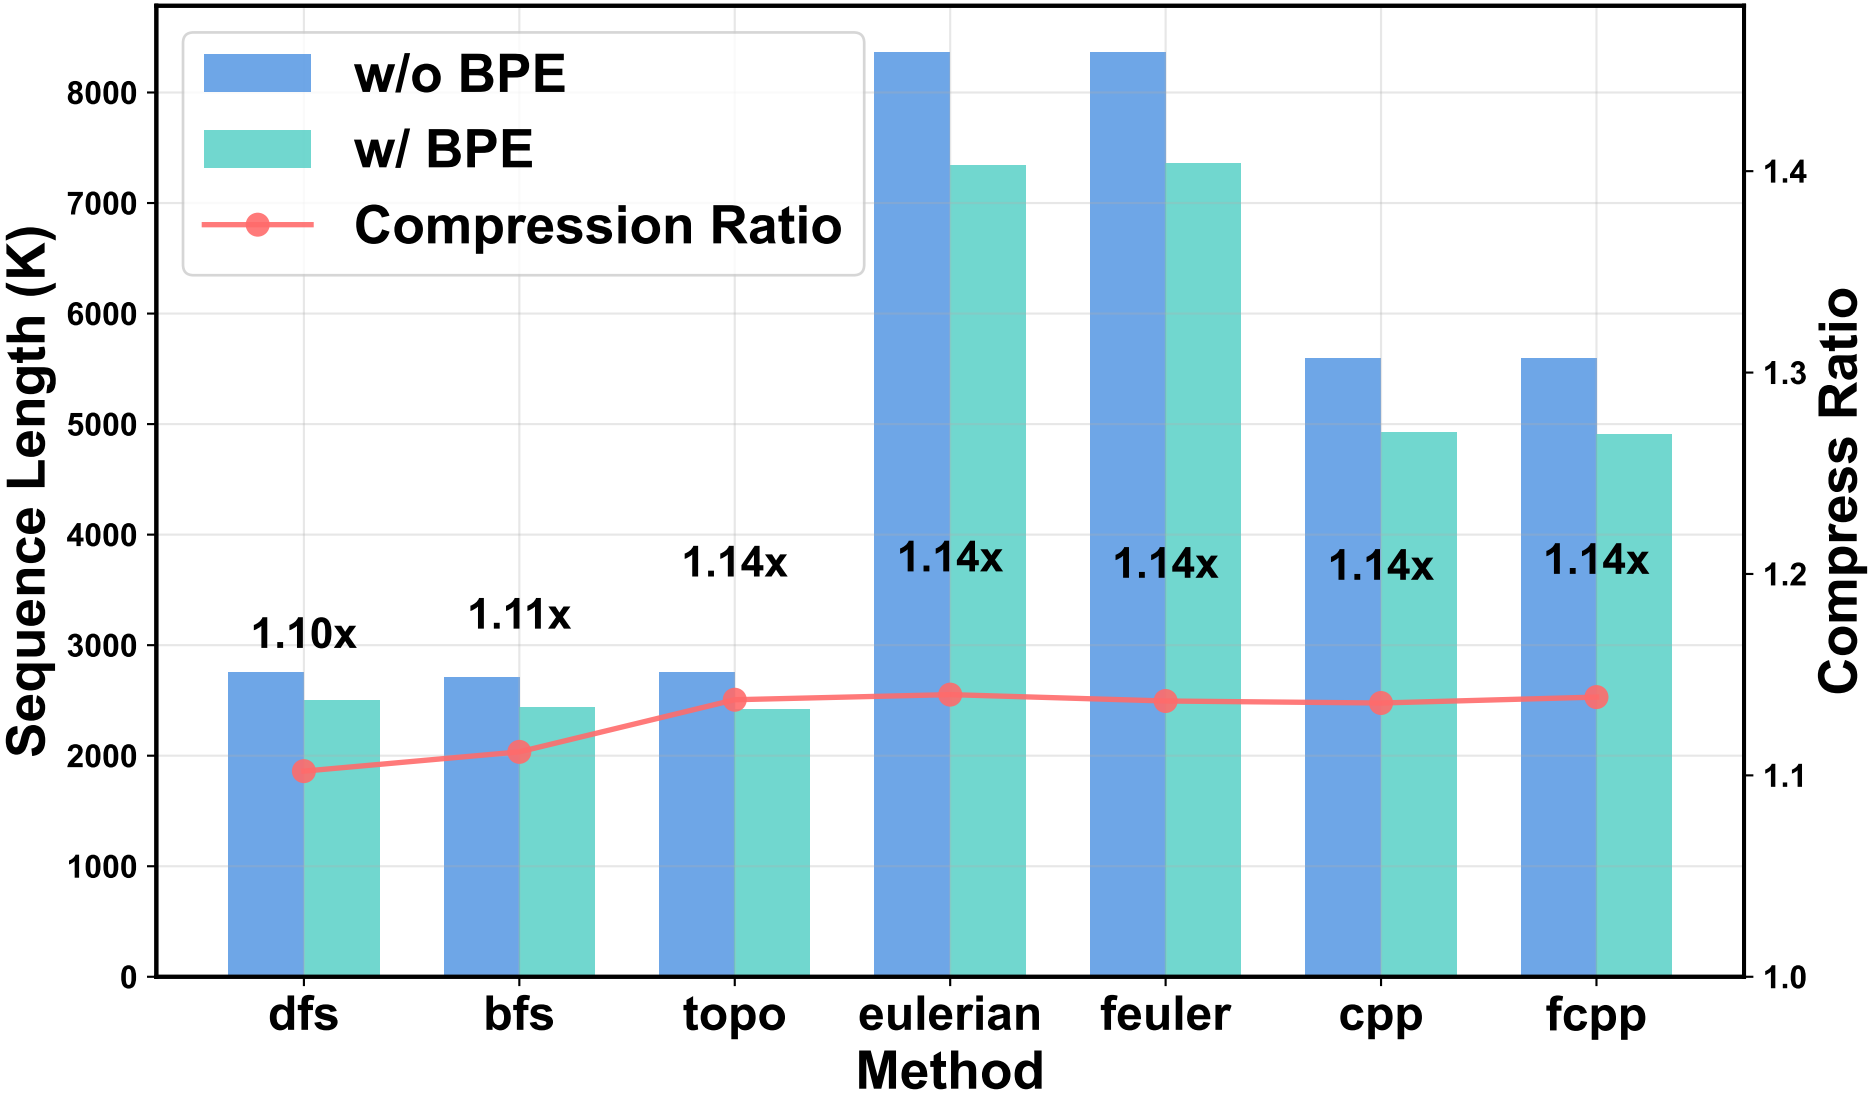

Supplement: supplementary_material [file twitter_token_length_comparison.pdf › submit_GraphTokenizer/submit_GraphTokenizer/final/exp1_speed/token_length/twitter_token_length_comparison.pdf]

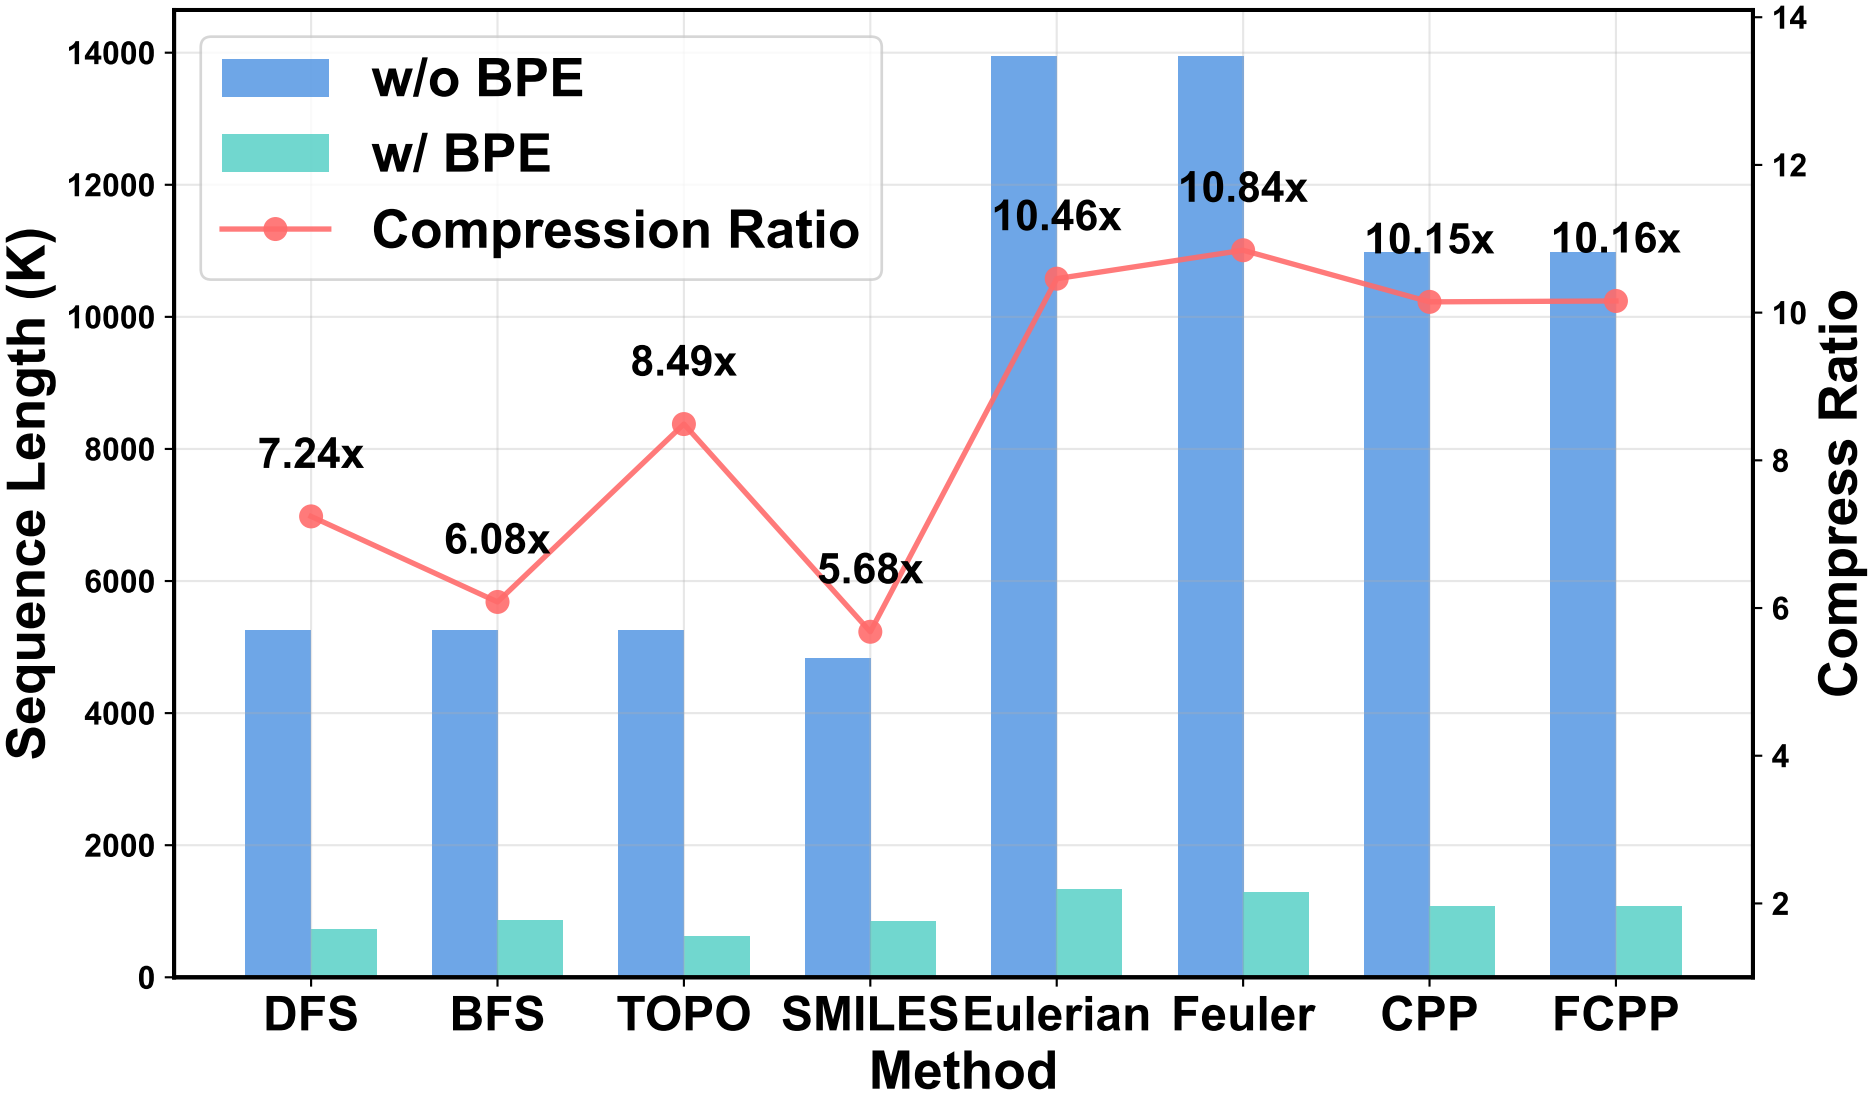

Supplement: supplementary_material [file zinc_token_length_comparison.pdf › submit_GraphTokenizer/submit_GraphTokenizer/final/exp1_speed/token_length/zinc_token_length_comparison.pdf]

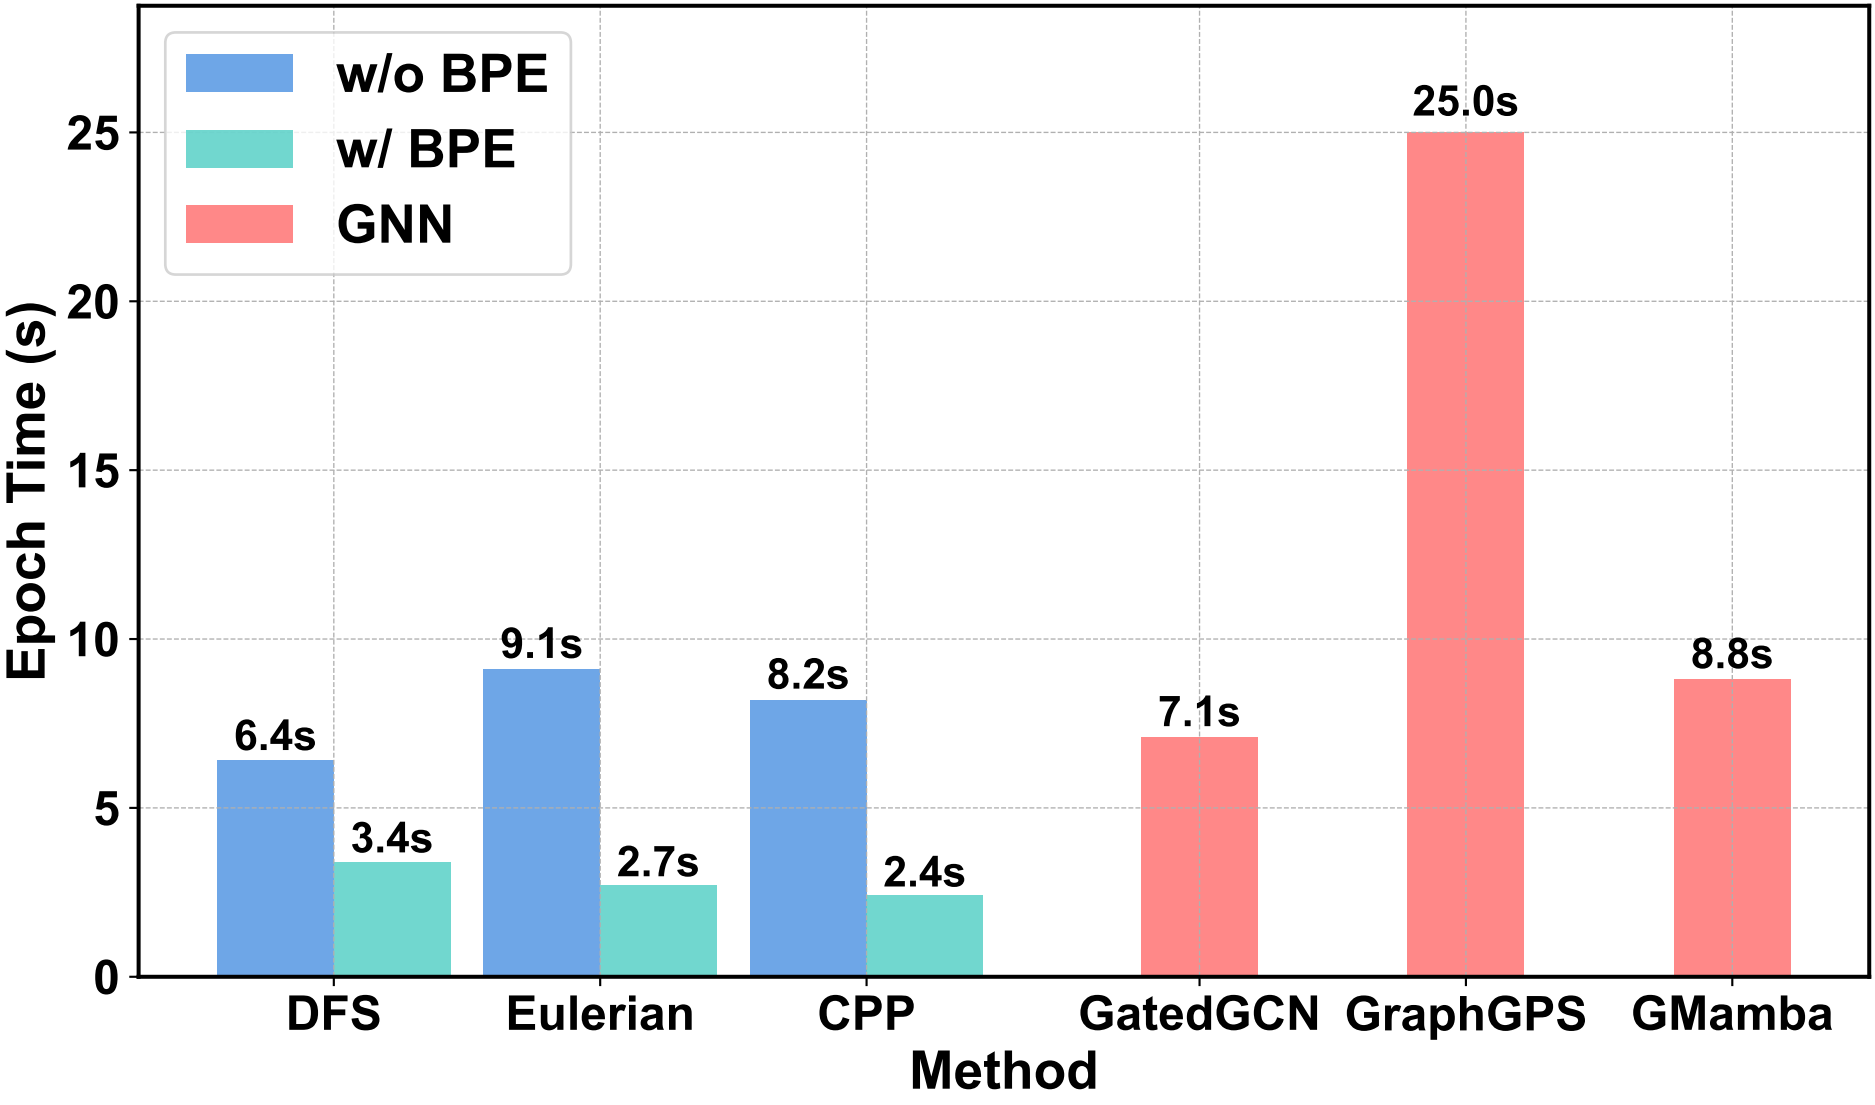

Supplement: supplementary_material [file AQSOL_training_efficiency.pdf › submit_GraphTokenizer/submit_GraphTokenizer/final/exp1_speed/train_time/AQSOL_training_efficiency.pdf]

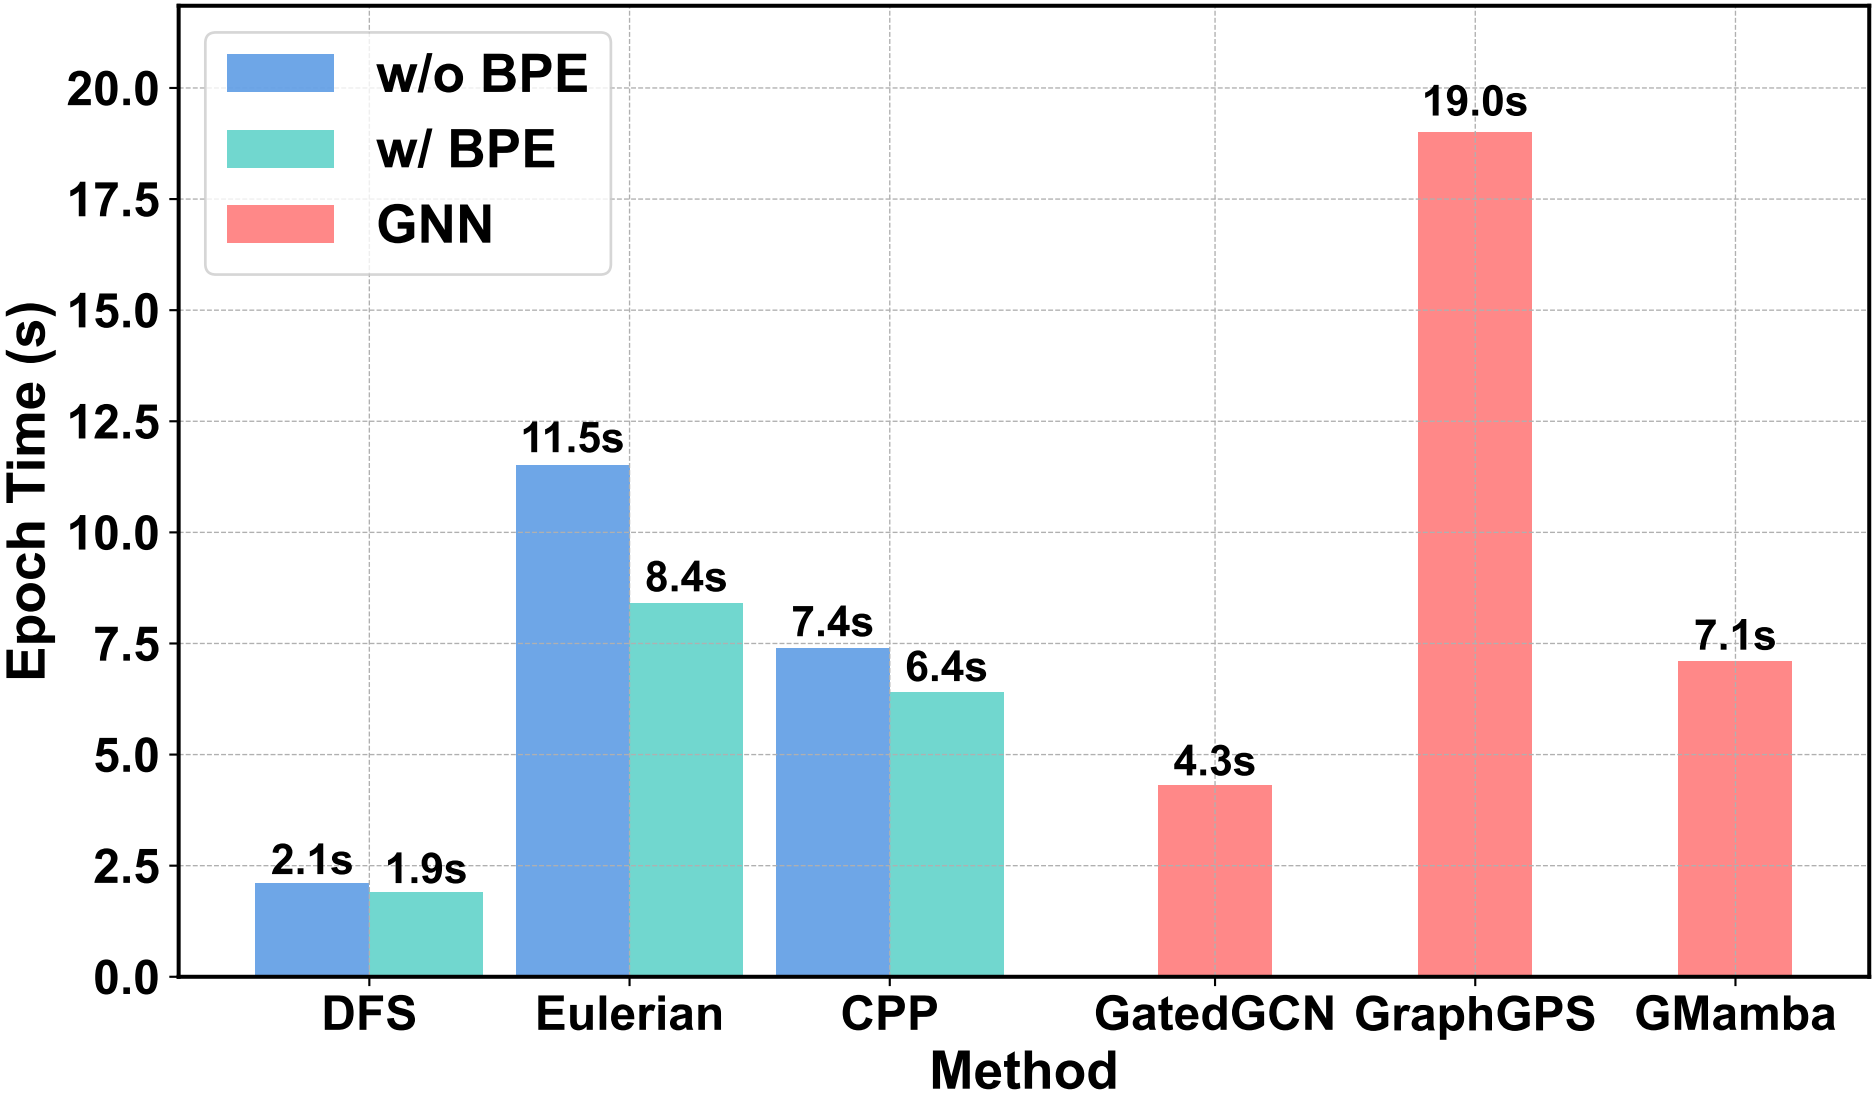

Supplement: supplementary_material [file COILDEL_training_efficiency.pdf › submit_GraphTokenizer/submit_GraphTokenizer/final/exp1_speed/train_time/COILDEL_training_efficiency.pdf]

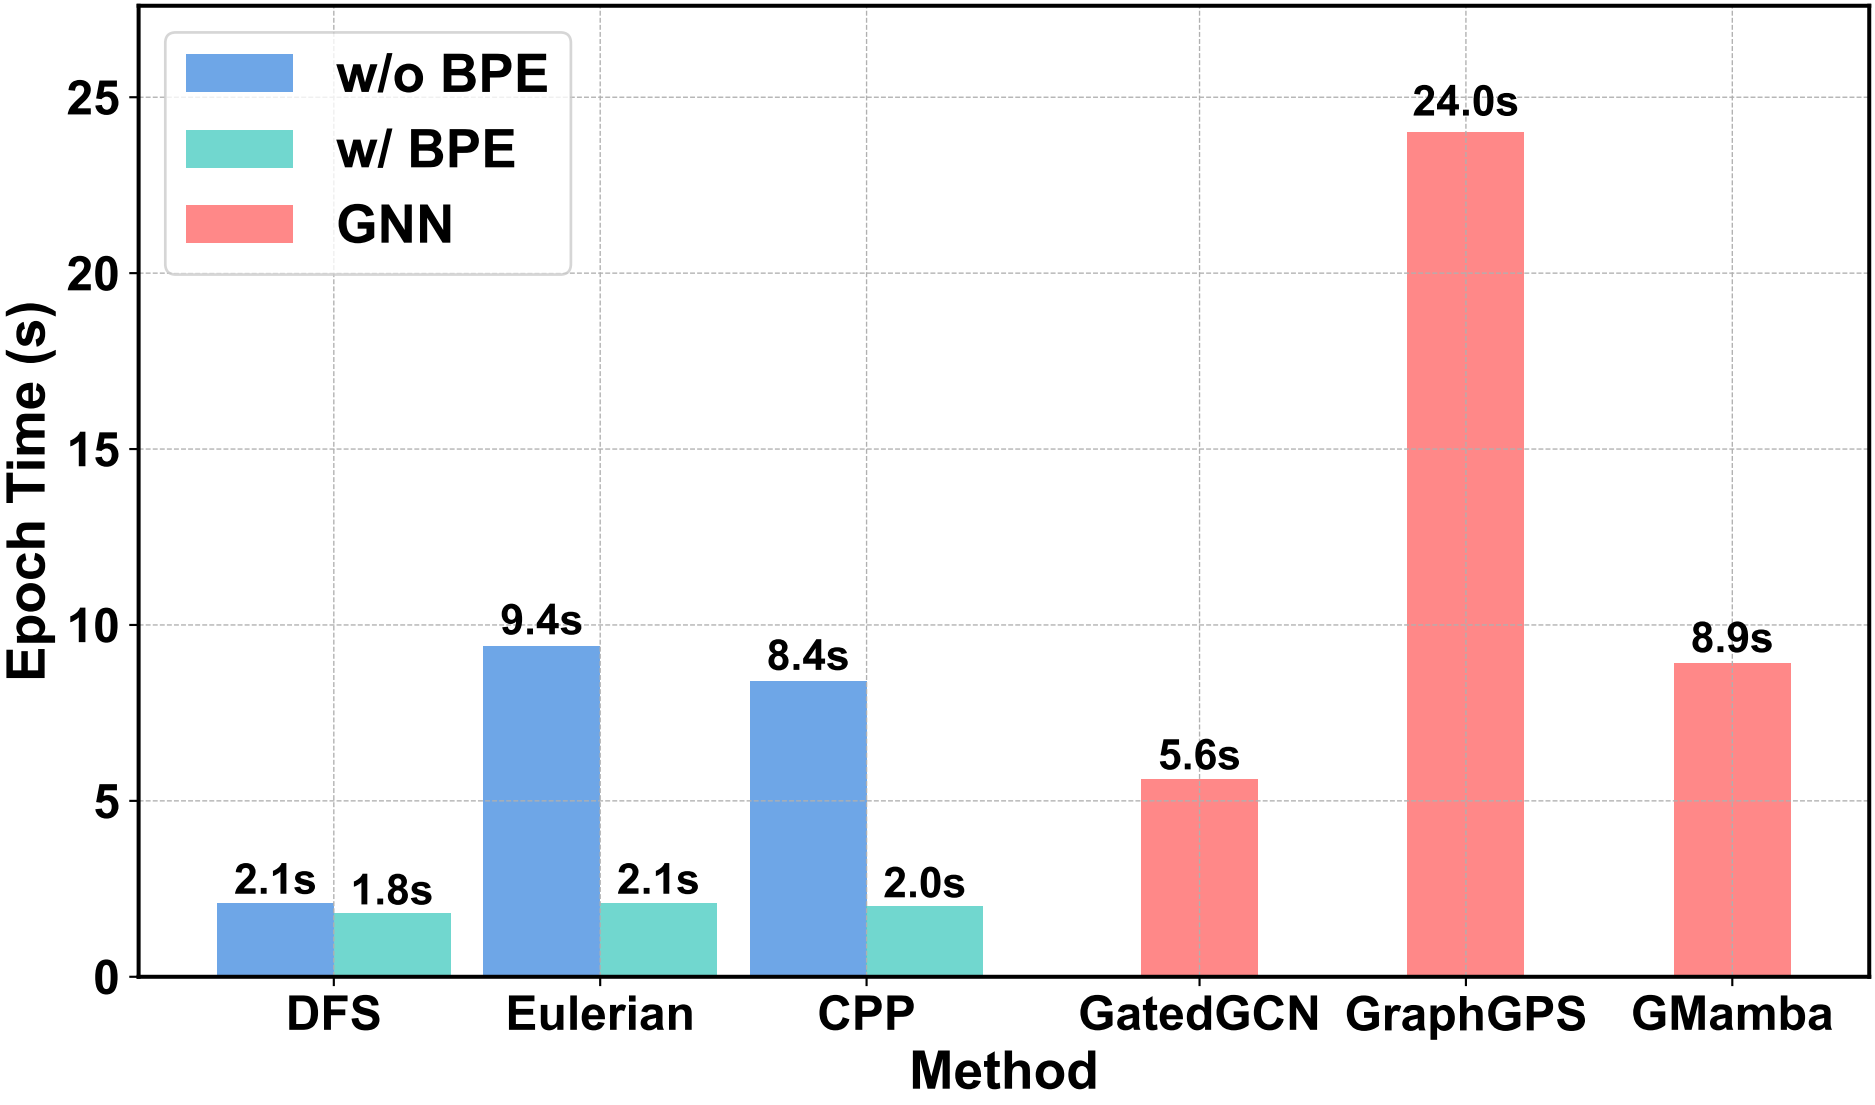

Supplement: supplementary_material [file COLORS3_training_efficiency.pdf › submit_GraphTokenizer/submit_GraphTokenizer/final/exp1_speed/train_time/COLORS3_training_efficiency.pdf]

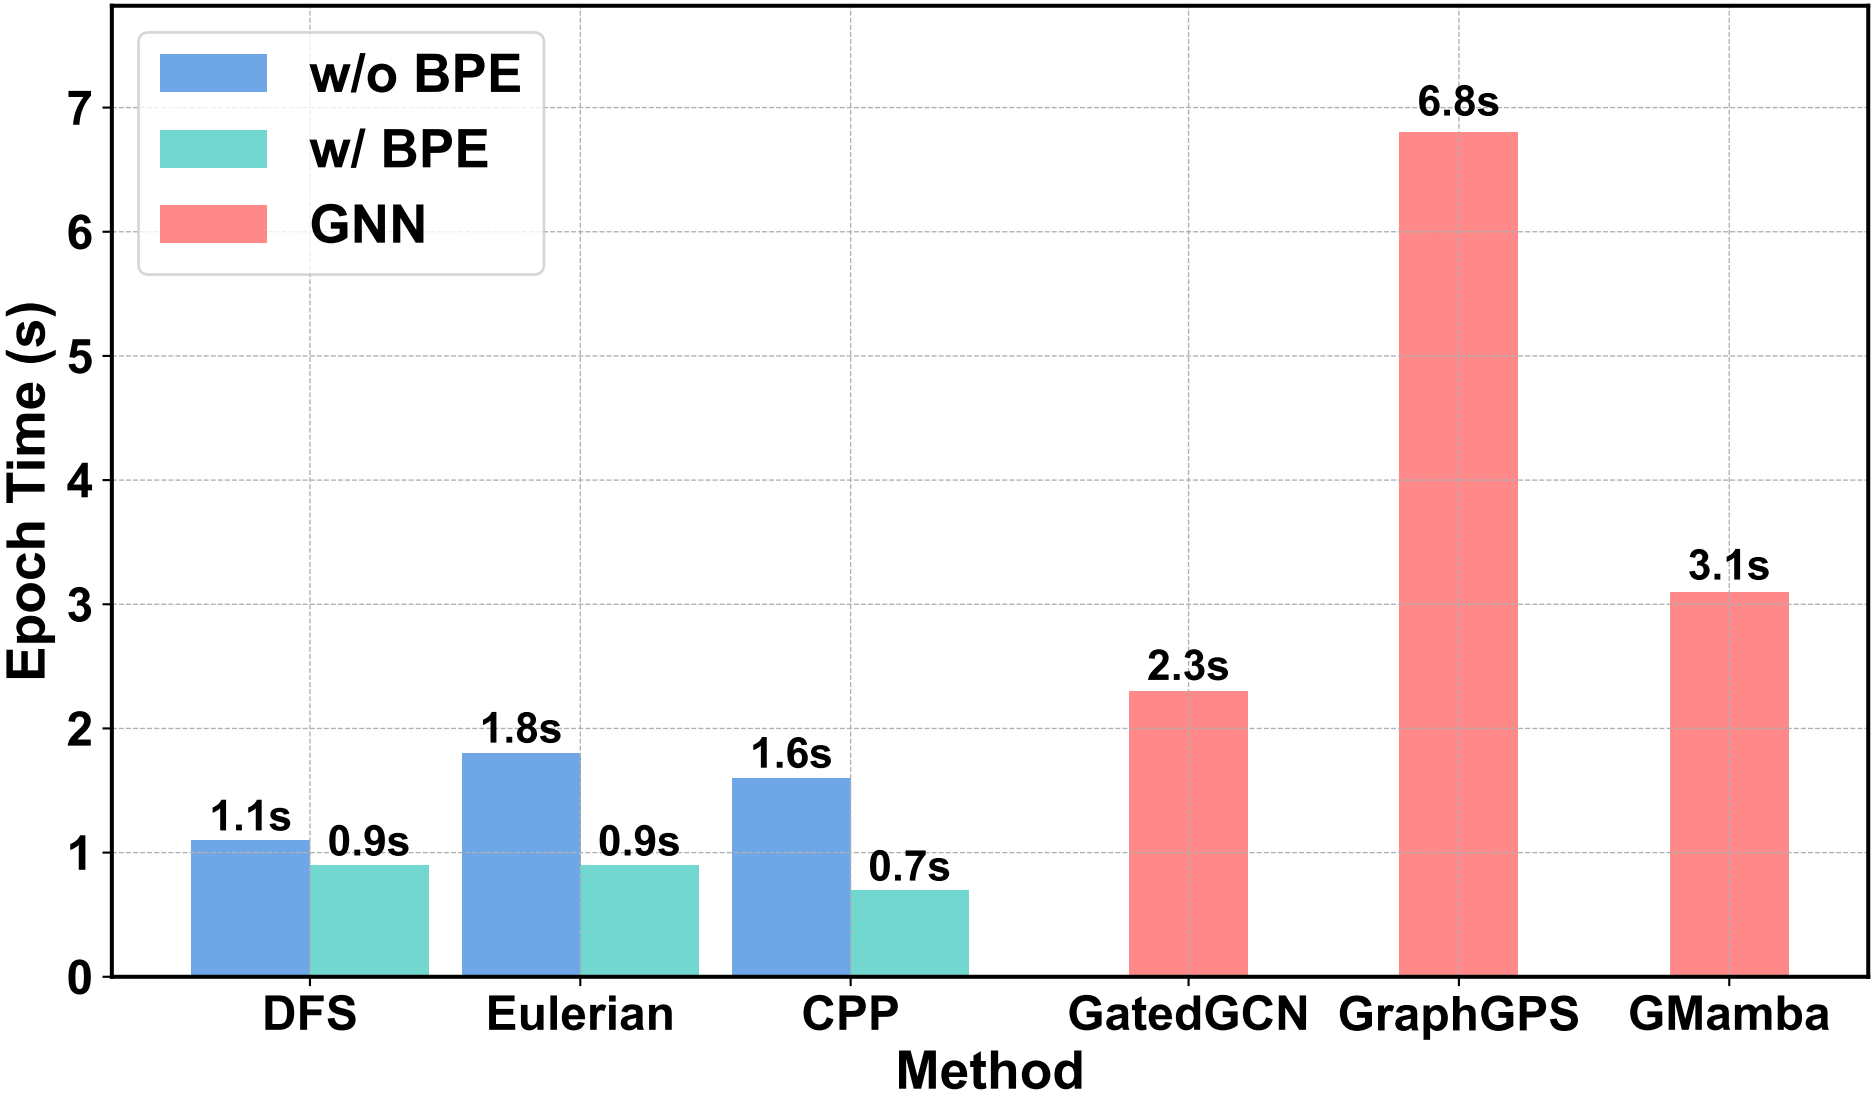

Supplement: supplementary_material [file DD_training_efficiency.pdf › submit_GraphTokenizer/submit_GraphTokenizer/final/exp1_speed/train_time/DD_training_efficiency.pdf]

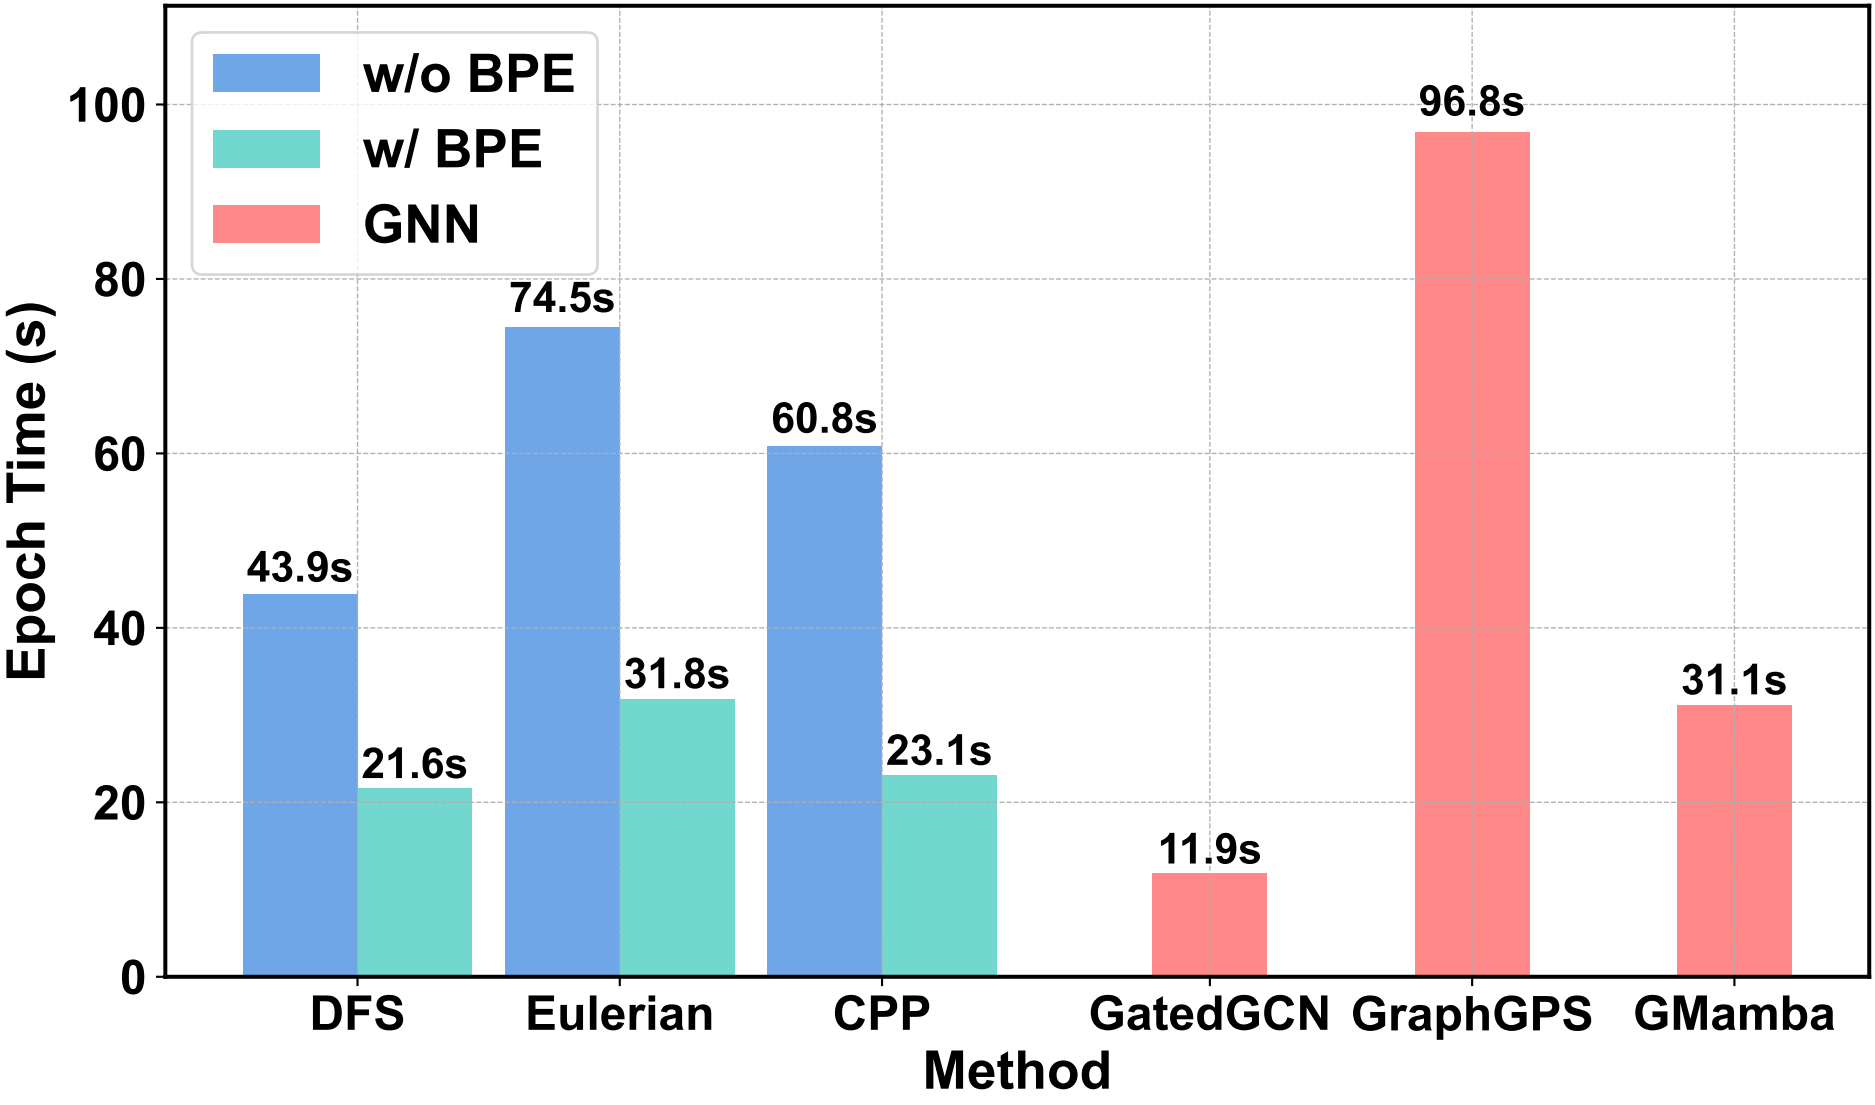

Supplement: supplementary_material [file MOLHIV_training_efficiency.pdf › submit_GraphTokenizer/submit_GraphTokenizer/final/exp1_speed/train_time/MOLHIV_training_efficiency.pdf]

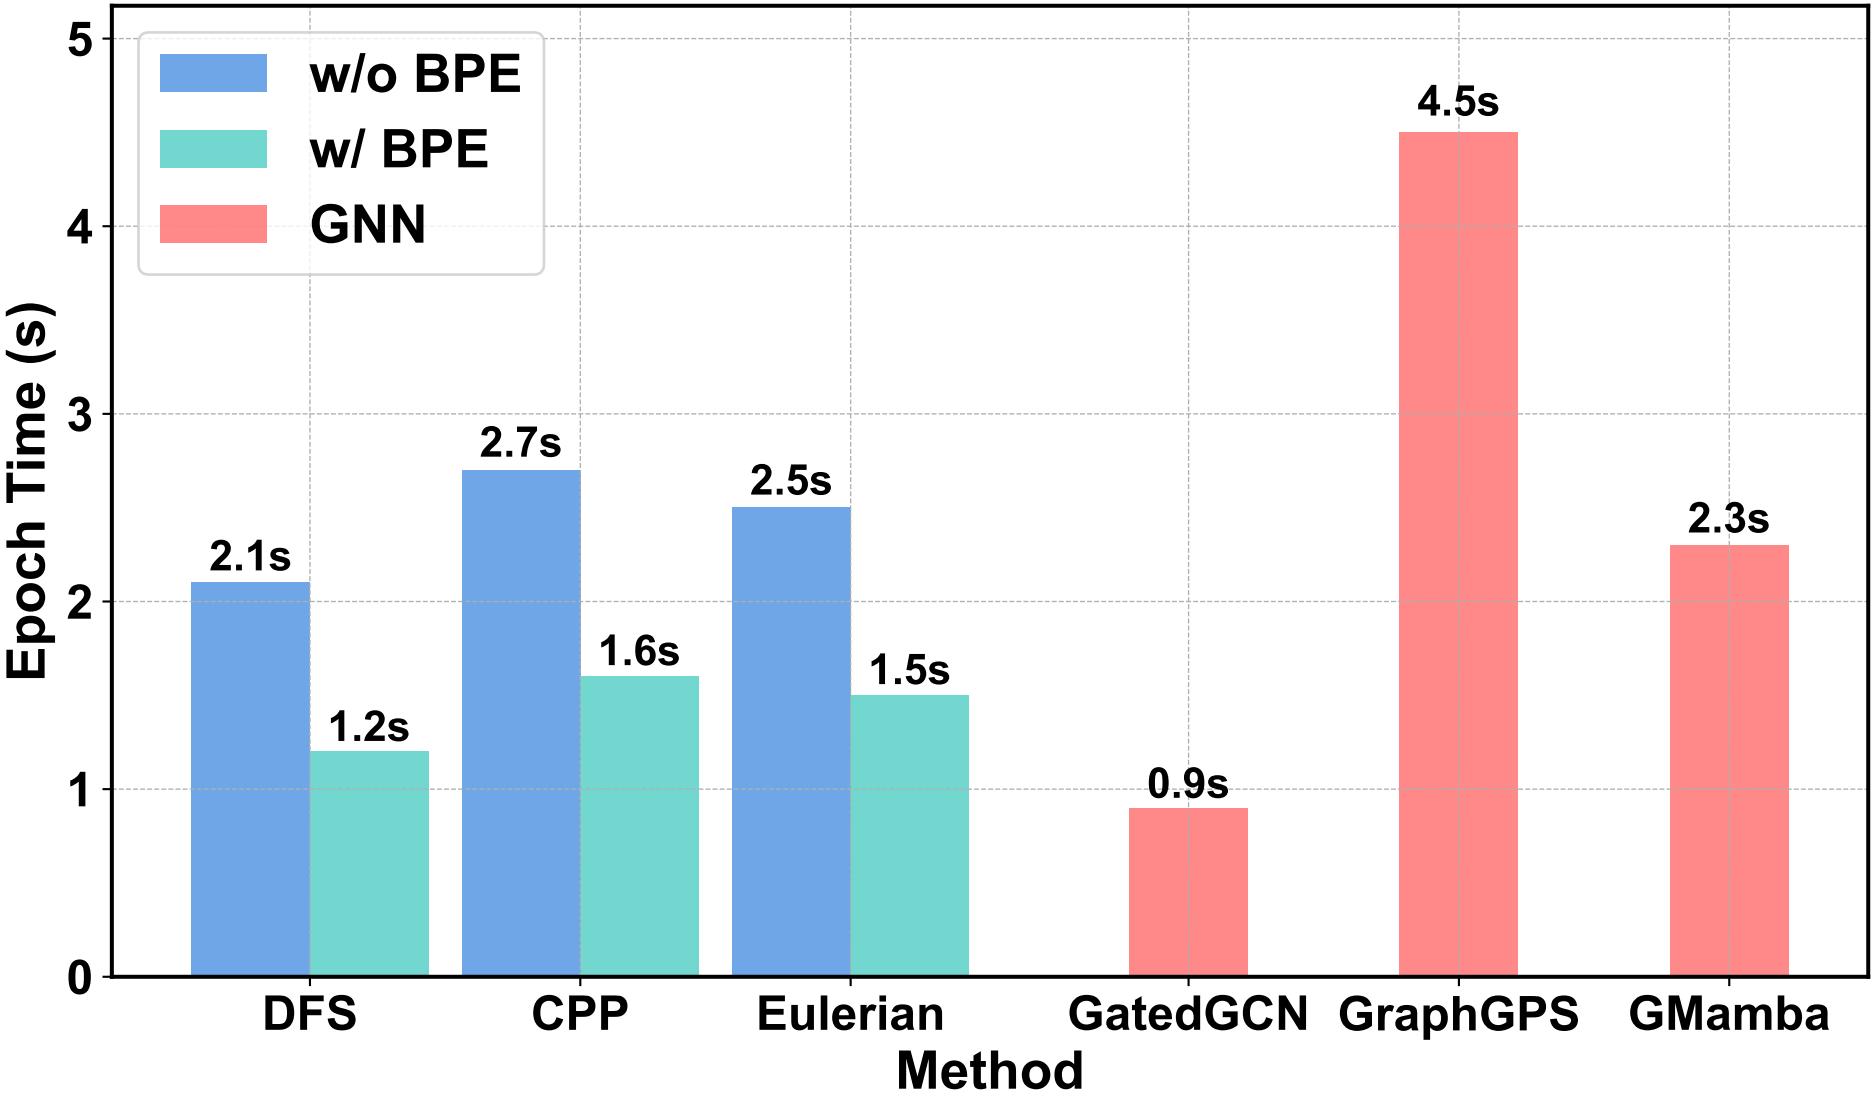

Supplement: supplementary_material [file MUTAGENICITY_training_efficiency.pdf › submit_GraphTokenizer/submit_GraphTokenizer/final/exp1_speed/train_time/MUTAGENICITY_training_efficiency.pdf]

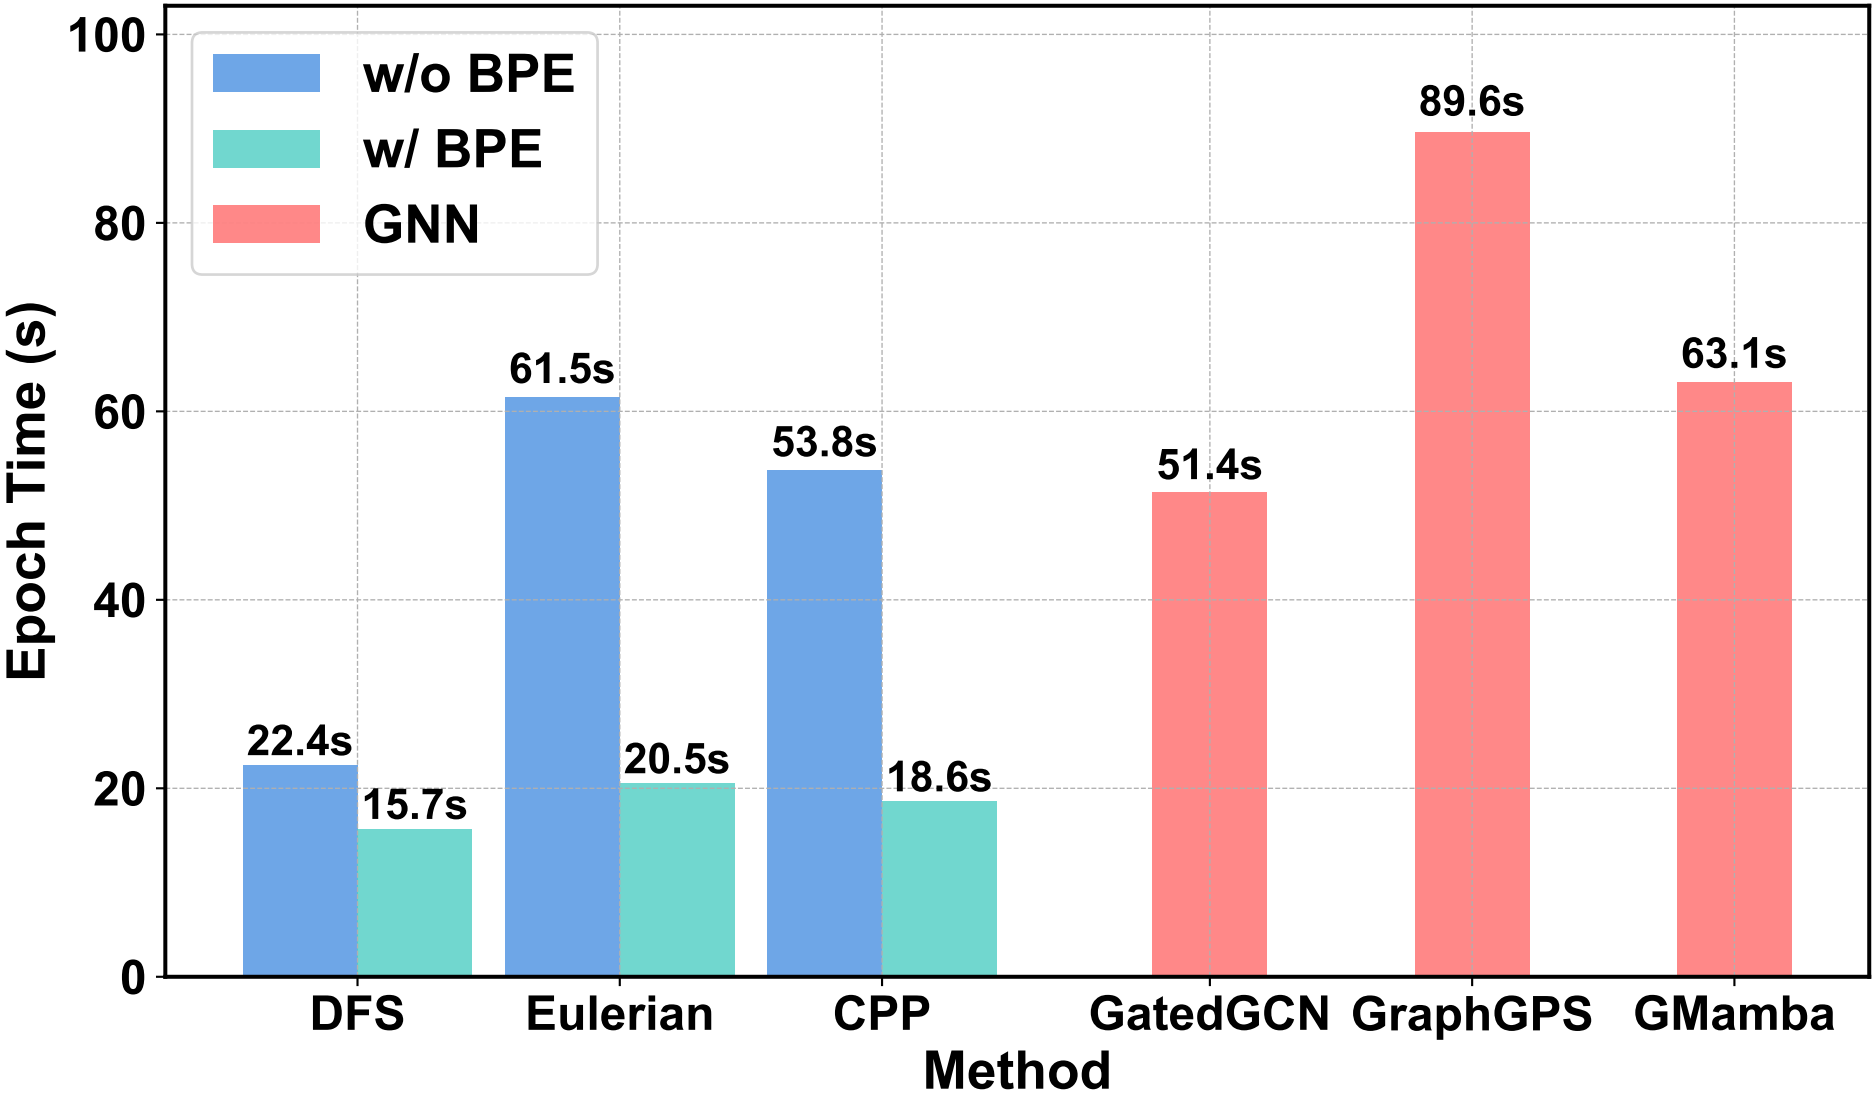

Supplement: supplementary_material [file QM9_training_efficiency.pdf › submit_GraphTokenizer/submit_GraphTokenizer/final/exp1_speed/train_time/QM9_training_efficiency.pdf]

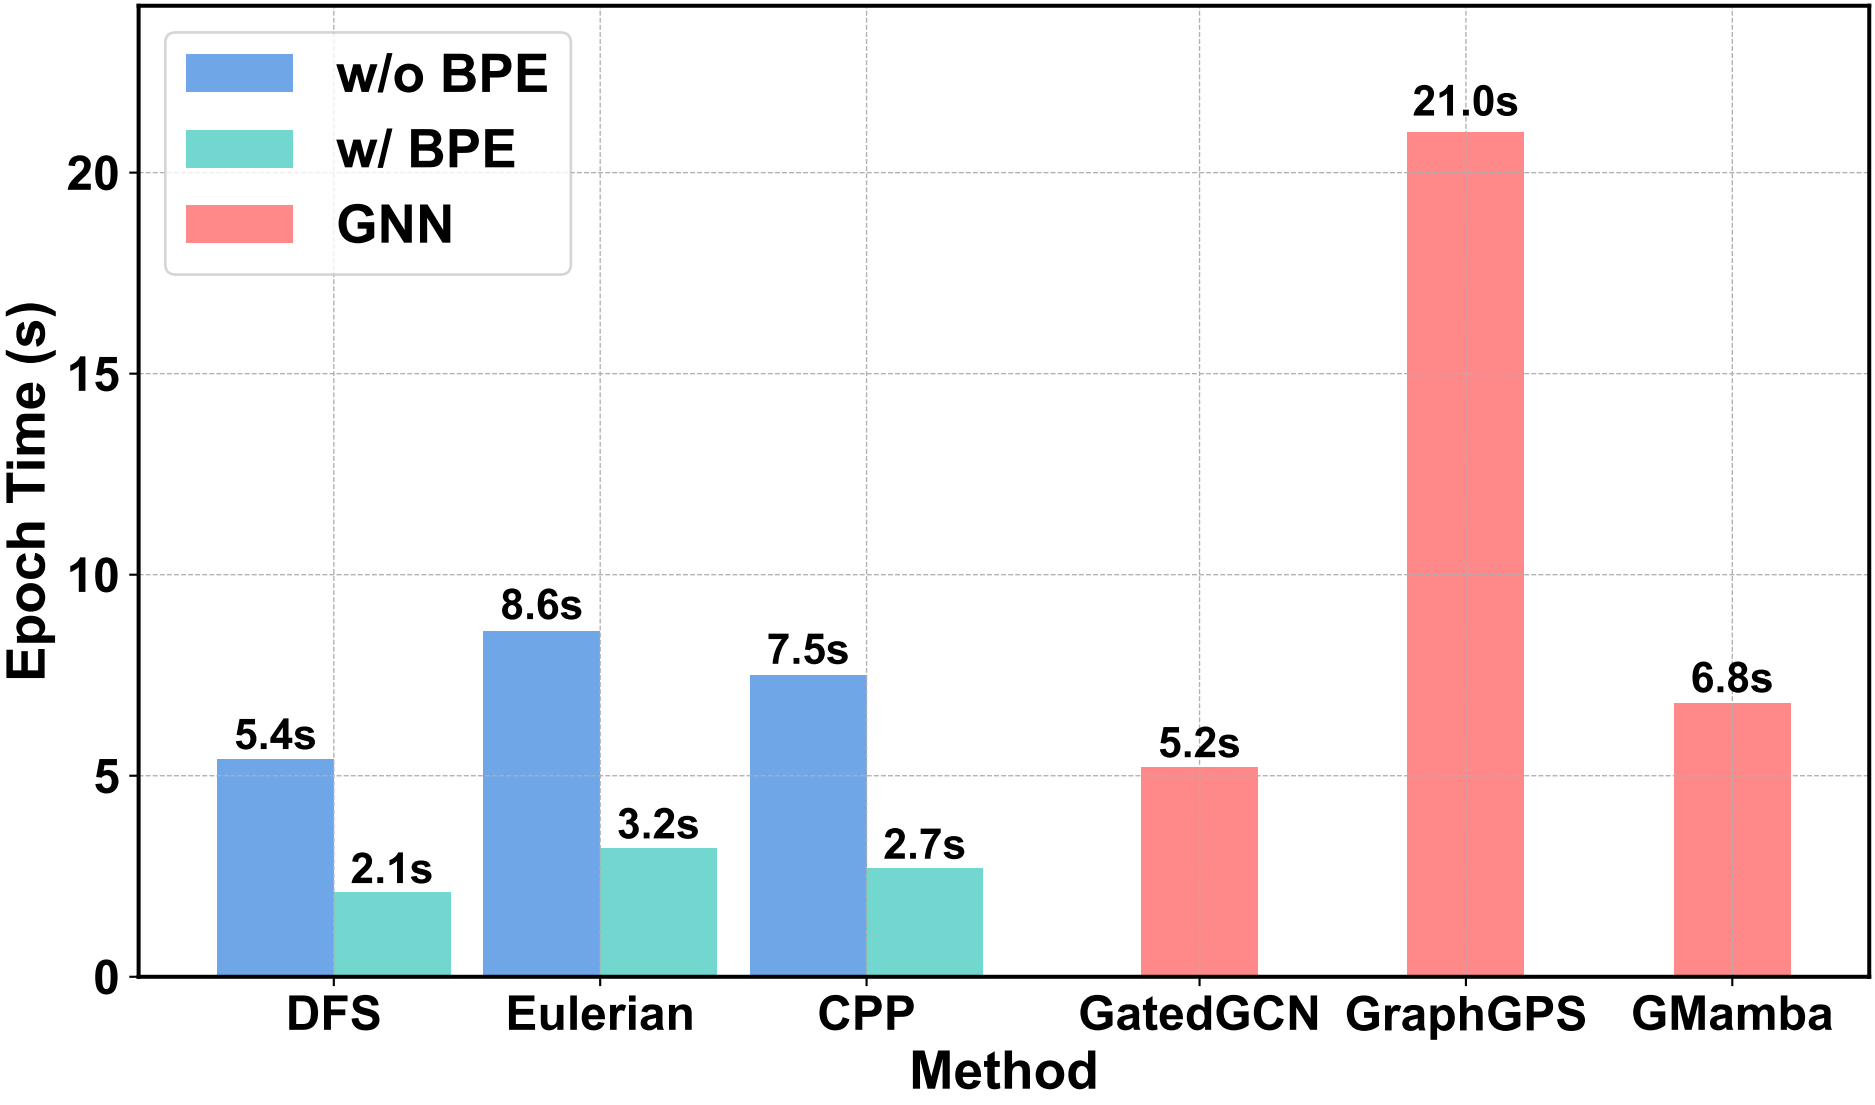

Supplement: supplementary_material [file ZINC_training_efficiency.pdf › submit_GraphTokenizer/submit_GraphTokenizer/final/exp1_speed/train_time/ZINC_training_efficiency.pdf]
